# Supplementary material for: Gene Loss, Pseudogenization in Plastomes of Genus Allium (Amaryllidaceae), and Putative Selection for Adaptation to Environmental Conditions
Source: Front Genet. 2021 Jul 8;12:674783. doi: 10.3389/fgene.2021.674783 (PMC8296844; doi:10.3389/fgene.2021.674783)
Supplement: Supplementary file 3 [file Data_Sheet_3.FASTA]

>Allium_semenovii_concensus_v2
GTGGAGCTATACCCAATAGATATTAGGTATAGCCCCTTCGTTCGACGATTCTTAATACATTAAGACGAAAGT
CTTATCCATTTGTAGATGGAACTTCTACAGCAGCCAGGTCTAGAGGGAAGTTATGAGCATTACGTTCATGCA
TTACTTCCATACCAAGGTTAGCACGATTGATGATATCAGCCCAAGTGTTAATAACACGACCTTGACTATCAA
CTACAGATTGGTTGAAATTGAAACCATTTAGGTTGAAAGCCATAGTACTAATACCTAAAGCAGTGAACCAGA
TACCTACTACAGGCCAAGCAGCCAAGAAGAAATGTAGGGAACGGGAATTGTTGAAACTAGCATATTGGAAGA
TCAATCGGCCAAAATAACCATGAGCAGCAACGATATTATAAGTTTCTTCCTCTTGACCGAATCTGTAACCTT
CATTAGCAGATTCATTTTCAGTAGTTTCCCTGATTAAACTAGAGGTTACCAAGGAACCATGCATAGCACTAA
ATAGGGAGCCGCCGAATACACCAGCTACGCCTAACATGTGAAATGGATGCATAAGGATGTTGTGCTCTGCCT
GGAATACAATCATAAAATTGAAAGTACCAGAAATTCCTAAAGGCATACCATCAGAGAAACTTCCTTGACCAA
TAGGATAGATCAAGAAAACAGCAGTAGCAGCTGCAACAGGAGCTGAATATGCAACAGCAATCCAAGGACGCA
TACCCAGACGAAAACTAAGTTCCCATTCACGACCCATGTAACAAGCTACGCCAAGTAAGAAGTGTAAAACAA
TTAGCTCATAAGGACCGCCATTGTATAACCACTCATCAACAGATGCTGCTTCCCATATCGGGTAAAAATGCA
AACCTATAGCTGCAGAAGTAGGAATAATGGCACCAGAGATAATATTGTTTCCATAAAGTAAAGACCCAGAAA
CAGGTTCACGAATACCATCAATATCCACTGGAGGGGCAGCAATGAAGGCGATAATAAATACAGAAGTTGCGG
TCAATAAGGTAGGGATCATCAAAACACCGAACCATCCGATGTAAAGACGGTTTTCAGTGCTGGTTATCCAGT
TACAGAAGCGACCCCACAGGCTTGTACTTTCGCGTCTCTCTAAAATTGCAGTCATGGTAAAATCTTGGTTTA
TTCAATTTTCAAGGACTCCCAAGCACACGTACTAACTATAAATAAGATAGATAATAGAAGGCTTGTTATTTA
ACAGTATAACATGCCTTATATGCCAATGTCAACCAATCCCAACTGACCAATCTCAACTGATATATATCCATT
TGACTAAATTAAAATACAACATAAAACTTTAAAATTGAAATGGATGAAAATCAACAAAGAAAGCTTTCTTTT
TTAATTTTCTGTATGGGTTGCCCGGGACTCGAACCCGGAACTAGTCGGATGAAGTAGATACTTTTTTTCTTG
TTGCAATAGAGGAAAAAGACCCCTCCCCAAATCGTGCTTGCATTTTTCATTGCACACGACTTTCCCTATGTA
TACAGATAAAAAACATATATATCAAGAAGAAAGTATAACAATTTTGAATATTCAGGGGACTACATGGGCATT
TCAGAAATTAATGAATTTTTTTTGTTAAAAAAAAAATTCATTAAAAGAATAATTAGTTCAAATTAAAGGGTA
TCATGATCAATCATGAGTGACTCACTAAATCATTAATATGGATAATATCCAAATACCAAATACGTTCTCTCT
GTGATCGATGTAAAGTAAAGGGAATTTGTTTTGGGAAGATCAAAGAAAGAATCTGTTCTTCTTCCGTAAAGA
ATTCTTCTAATAACCCCGAACCTAATCTACGCAAAAAAATGCGTACTGTACTTTTATGTTTACGAGCCAAAG
TTCTAGCACACGAAAGCCGAAGTATATACTTTATTCGATACAAACCCTGTTTTTTTGAGGATCCACAGTAAT
AATGAGAAAGATTTCTACATATTCGACCAAATCTATCGAGAATATCAGAATCTGATAAATCGGCCCAGATTG
GCTTACTAATAGGATGGCCCGATACGGTACAAATTTTAGCTTTAGATAAGGATCCAATAAGAAGAATAACTG
GGATTATGGTATCAAATTTCTTAGTAATGGTATCTATTAGATACGAATTCTTTAACATTTTATTCCTTATAG
CCAAAGAATTTTTTAGTAAACTTGCAAAATAACCCAAAAAATGGAAGGAATAGTTTGATAATTTATTTATAT
AGATCCTATATGGTTGAGACCAAAAGTTAAAATAATATTGCCAAAAATTGACAAAATGATATTTCCATTTCT
TCATCAGAAAATGAGTCCCCTTTGAAGCAAGAATTGCTTTTCCTTGATATCGAACATAATGCACGAAAGGAT
CTTTGAAGAACCACAGAGTTCTATGAAAATAGTTACGACATACTACTAAAAAATATTCGATTTGAAGATGTT
CTATTTTTCCATAGAAATGTATTCGCTCAATAAAAGTTCTAAAAGAAGTTAATCGTAAATAAGAGGATTGTT
TACGAATAAGCACTAATAAAATTTCGCACTCAAATACATAAGAATTATATAGGAACCAAAAGAATCTTTTAT
TTTCTTTCGAAAAAACATAAATAGATTTCTTCTTAGTAATGGAGAGATTATTCCAATTATGGTATTCGTGAA
GAAAGAATTGCAATAAGTGTAAAAAGGGAACATCTTGAATCCCGCACTGAAGGATTTGAACCAAGATTTCCA
TATGGATAGGATGAGGTATTAGTATATCTAAAACATAATTTAAATGCAATAATTTGTCCTCTAAAAAAGGAA
AAATTGAATGAATTGATCGTAAATTATGATATTTTGGTATTTCTTTTTTTTCTAAATAAGATACTAATCGCA
AGGAAAATGGAATTTCCACAATAATTGAAAAACTTTCTGATATAATTTGAGAATAAAAATGAGAATAAAAAA
AAATGTTGTGAGTGTGACCAATAAATAAATTTTGGTTGGAATAATTAACCGAAGAAATCAAAGAATTCTTTT
GATAGATTCGAATAATTAAACGTTTTACAAGTGATAAACTAGATTTATTATCATAACCAAAGACTTTTACGG
GTTCATAAAAAATCAAACCATTTAAACCATGATCATGAGCAAGTGCATAAATATACTCCTGAAAGAGTAACG
GATATAGGAAATATTGTTGCCAAGATCTACTTTTTTCTAAATATCCTTGTAATTCTTCCATTGACTTCAATT
TCTACTTGAACCAGAAACAATAGGCATTTCTTGTATTATCAAATTATACATAGTGCAATACGGTCAGAACAG
AGTATGTATCATGTATGAAAAAAATATATACCCCGGAAATACAGAGTCCAATCAACAGATCTTTTTCCTCTC
CCCTTCTACTATCCAATAGGTTTATCTTCGTTCTATTAAAAAAATTATCAGAGGATAAAAAATCTTTTATTT
TTGCAACCCGATCGCTCTTTTGACTTTGGAAATTTTTTTTGTCAATATACTGTTTCTTCTACACATTAGTTT
CCAATCCATAATAGAAAATAGGTAGGATTTTTTTTCTTAAAAAAAAGAATCAAAGGTCCATTTACAGGAGAC
CCCTTCCCCACATCAGGCACTAAGTTATTTTTAACGTTTAATTAGATCGGGAAATTATTCAAATTAAGAATA
AAAGCTCGTTGCTTTTTTTTTTTTACCAGAATTAGAGCCATAGAGCTCTATCCATTTATTCACTAGACCAAA
CTCTAACTGTGAATTTCTTAAAATAAAATAAAAATAAGAAAGAATATAATAAGAAATTTAAAAATGAGAATT
CAATTCCATTTTTTCTTATTATTTTATTACGACATGCGGTTTTTTCCATCCATTACCTTTCAGGATCAGTCG
TGGTCTTATAGACTCTACCAAAAGTCTGGACGAATTCGTTACTTCATTCAAATGTGTAAAAAACCATAATCG
CACTTAAAAGCCGAGTACTCTACCATTGAGTTAGCAACCCAGATAAATATGTATATACAAGTGGAAAAAATG
GAATTGAACTATACAACTACGTAAAAACATTGAATTTTGAATTCAAAAGAAATATAAAGGAAAGATTAGATG
ATCAATTAAACAAAATAGCAAAGTAGATTGGATTAAATTAAAGACAGATAAAAAAAATGTAAAAATTTACAT
TTAAAGACCGCCCCACTTTTTTATAAAATAGAAAAAATTTTTGATTTTCGTTAAAAAAAATATATCTTATAT
AACAAATAGTAAATTTGGCAAACCCATAATTTGAATGAAGTAAAGGAAAAACCCATAAATAAATAAGGATCG
AAATAAACAGATCTATTTATCTACGATCAAATTATATTTGTTCGACACACCATTGTCAATATGAATAAATTG
TTGAGAAAAAATGAAATAAAAAAAAAATTCAATAAAATAAGGATTTGTGTTGGAGTGGCACAACAATAAATA
TGGTAAATATAAAACATAATATAGAACAAGAAAAAAGCAATTGTGAGTAAATAATTACCACATAAATTTATA
CTAGTTACCTTTCTTTTTTCTAATTTTTTTATTTATTTTATGAATTCTTTTAAAAATTCTGCTTTTCTTAAA
ATATCACGAACAGTTCCTGTAGGTTGAGCACCTTTTTCAAGGAAATAACGAATAGCAGGAACGTTTAAATAA
GTTTGATTTTTCATTGGATCATAAAAACAAAACCCACCTTTCGAAGATCTCTTCCTTCTCGTCGGGATCGAA
CATCAATTGCAACAATTTGATAGATCGCTCATTGGGATAGATATAGATAAATAACCCCCCCTAGAAACGTAT
AAGAGGTTTTCTCCTCATACGGCTCAAGAAAAAATGATTCTAATATTTCTGTATATAATGTAAAATATATAA
AAAAATTAATGACTTAGACTATGATTTAAGTTTTTCTGTTCTTACTTACATAAAAAACTTACTTACATAAAA
AACTTACATAAAAAAAGAAAAAAAAAGAAATATCATTCGTACTCATAACTCAAGTTGGGTAATTCTGAAAAA
GTCTGAAGGTAAATCCTTAGGCATTTCTTGAGTCGTCTCTAACCTCTTTTGTTTGTTTCGTCTCGAATCTTT
TTTTAGTCTCCATCATTATACTAAAAAAAAAATATTGAGACAATTGAAAATAGTGTTTCCTTGTTCCGGAAT
TCTTTCTCTTTACTTTTTTAAATCATTAGGTTTAGACATTACTTCGGTGATCCTTATCCCCTTTTTCAAAAC
GGCAGCAACATACCTTTTGTTTTTTGTTATTTCCTTCTATGGAAAGATAATATGAACGATTTTTCCCTTGTA
ATATAAAAAATGTTATTTATTTTATTTCAAACTTGTTGGGATTTGAATCCTGTAATTTAAAATTTTAATTTC
TATATTGAGGATATACTTAACAAAGTAGTCTAATTTATTAATTGTTACTAACCCTAGATTCGCCCCCCCGAT
AAATGAATCAATACGTTTTGCTCGAGCTCCATCATGTACTATTCCTATTTACCAACCCAATACAAATTGGGT
TCCTAATAGGAACAGAACAAACTATGTCGATTCAAGAGCATCTTCATTCCTATAGAAAATGGTGGATGTAAG
AATCCACAGTGAATTATGTCCTTCAAGTCGCACGTTGCTTTCTACCACATCGTTTTAAACGAAGTTTCACCA
TAACACTCCTCCCGTTTTAAATTTTATTTTGAAACGGTATGCAATTGATTCAATATGGAATCATGAATAGTC
ATTGGCTCAATGATAGAAAATATTTTTTATGTATGTATCTAGGGAAAGGTAAATAATTATCTGGAAAAAAGT
CTTATATTATAAAGGATTTAAGTTATTTCGCCCCTCTATCCTATGGGATGAAAGAAATTTCTAAAAAAGAAA
AAAGAAAAGTGAATCCATTTCCTTAAATCTAATTAAAATCTTCAACAGATCATTCGGGATGTTATGTTAAAT
TATGGAAAAAATTCTTCTCGAACAAATAAACTCTAAATCTAAAAAGAACGGCCCTATGGATTTTCCAATTCC
GGAATAAAATCAGTTATTAACAAAATATAAGCTATTCCAATAACTCGAAAAAGTCATAAGTTTCTCTATATT
TATAATATAGATTTTTCAAATTTCTTCGAGTACCCAGGTTCATAACAAAAAGAATTTTTGTTTTCATGAGTA
TGAAATAGAAAAGGATCTCTTTTTCTCTTTCAATTCATAATTCCATAATGAATTACATAATACGAGAATTCA
GATTTCATGGAAAAAAGAGTTTTCCTAAGTAACTTACTTCAATATGACTATTAAAATAGTAGTCTCTTAATG
ATATACCAAAAAATTGTTTTATATTTAGAATTCAATGAAATATCTTTATTTCTACCCGTACACTCAATTGCA
TTTGTGAAAAACTAAATGAAAAAAGTTTTATTTTTATAGAAAAATCAGAACAAAAGGTGACACTATATCCAA
GATTAAAGAAAAAAATTTCCAAACTTAAAGAGAAATTTGTTAAAGAGAAGAATCTTTCCTTTCTCATGTAGA
CGCTCTGGGACGGAAGGATTCGAACCTCCGAATAACGGGACCAAAACCCGTTGCCTTACCACTTGGCCACGC
CCCATTTCGATTTCGAATTTCTCTTTGATACTAATAAAGACTAATATTGGTATTAGTCGTTCGTCAATCCCA
ATTCAAATATATATGAAATATATTACTGCTAGGATTCAACACATGAAAATATAGAAAAAAATGATTGATCAT
TCCATAAAATTAAATTAAGATATTGTATGAAACTAAAATTCCTTGTATTCTCATTTGAGAATGAAAGGGAAG
ATTTTTGATTTGAGAGCGTTCAAAGAACAAGAAGGTTTTTTGACCTACCTTTTAATTTTTCCCTCATAAAAA
GAACTCAATCAAAATCTAATTTTCTAATCTACAAGAATGAAATGTTTGTTATGCTTAATATCTTTAGTTTAA
TCTGTATCTGTCTTAATTCTACCCTTTCTTCGAGTAGTTTTTTCTTCGGCAAATTGCCCGAGGCTTATGCCT
TTTTCAATCCTATCATAGATGTTATGCCTGTCATACCTGTACTATTTTTGCTCTTAGCCTTTGTTTGGCAAG
CTGCTGTAAGTTTTCGATAAAATCTTTAATGCTCCGAAAAATTCATGATTTTTACGAAACAAATTTTCTAAA
AATTTATAAGATCTTATAAATTTTACATTATGAACCCTCCATTTGAAAATAGAAATTCTTGTTCTTGTATTA
TATTGAATAATTGCACGGTGATAAATTTTGATCAACTTATTTCCTCGTTCTGACCTTCCAGTAAATAAGGAC
TTTCTAAAGACCCCACAATACCAAATAATGGATATGACCAAAAATACCAAAAATTTTTGGTAATGAAGGAAT
CAGAATCTTGTTTTTCTTATTATTATTACATTACAAAAACAAAAAATTAGTAAAAATTACCTTTTTCAAGAA
AAGACTTCATTTTCTTTTTGGTTTCTTTTTGGAGCACTATGTCAACATAGTGTATGTGATAAAAAATAGGCA
ATCTATTTCCCTTTTCAAAAAAAATCTTGGAGATTGTGTAATGCTTACTCTCAAACTCTTTGTTTACACAGT
AGTCATATTTTTTGTTTCTCTCTTCATCTTTGGATTCTTATCTAATGATCCGGGCCGTAATCCTGGACGTGA
GGAATAAAAAAAAAAGATTTTGAAAGTCTGAAGTGATCGAGGGGAGCGGAGAGAGAGGGATTCGAACCCTCG
GTACAAATAACTCGTACAACGGATTAGCAATCTGTCGCTTTAGTCCACTCAGCCATCTCTCCCAATTCAAAT
TGAAAATTTTTTATGTGGTGTGACGGGCGAAGTAAAAAAGATTTAAATTGAAAAACATTACTTCCTTGATTT
TCATTTTGTAAGAAAAGTCCATTCCCCCGGCCAGTACTTAACCAGGCCGGGTTATTACATTACTTCTGATGA
ATCAATCATTTCATAGATCAAATGATTTCATTTTTTGTTTTTACTATATCAAATAAAAGATACTTGTTATTG
AAGTTATTGAAGTAACAATAAAGACAATTTTTATCTCCATTCCAAGTGTAATTTCTTAGTATTAGTAATATA
ATACTATAGAAAATACTATAAAATATATATAAAATACTATAAAAATACTATAAAATATGTCAAATATTAAAA
TTAATAATTCTTTTTTTATTAGTATTTATTAATTAGTATTAAGTAGTATTTTGAATTAAGTAGTATTTTGAA
TTTTGAGTCTTTTTTATCAATTTAGTTAATTATTTAATTGGAAAAAAGCACATACAGATATTAAATTTAATA
ATATAATAGAAAAAATGAAACGCACATATGTTATAACATATATAACATAACTCTTTTATTTGTTCAAGGGAC
ATTGAACATTTAAGATCCAATTAATCCGAGTTCAAATTCAAAAATGGGTCAGTTGAAGGGAAAGTAAAAAAA
AAAAATGAGGAATTCGTCGTGGTTATAGCCCAGCTTCAATAATTCCTTCAATTTTGGACTGTCAGTAATGAC
TTATAACAAGTGAAAAATGAGACTTTTTGCTTTATTCTAACTTTATTAGAATTTGGTTATTTAAAAAAACTT
TCTGTACTTCGACTTCAAGTACCCCTGGTCGGGGAGGATGAAGTGTCAACGCTCAAGTTTTAATGAGTCTGA
TGCTATTAAGATAGCATCTCATTCCTTTGTTCGACAAAAGGTATATTCATATATAATAATGAATATGAAGCG
GGTATAGTTTAGTGGTAAAAGTGTGATTCGTTCAATTAATAACTTAAAAAGTTAAGGGGTCTTTCGGGTTTT
TCATATTCCGATCAAAAAAAAACTTTATTTCCTAAAAAGAGTTTAATCCTTTTCCCCTCAATAGCATATTTG
AGGAAAAATAGAAATTCTCATGATTTGTATCCAAAGTTCAATTGAAATTGAATAAAAGGGTTATAGAGTCAC
GAAGCATAATAAAAAAAAATTTGGATCAAATCTTCCAATTAATAAATATAAGTAAAGGATCTATGGATGAAG
ATAAAAAACAAAAGTGCATTTCCAATCGTAACTAGATCTTAAATTTTTGTCTTGTATAAGCTAAGATTAAAG
CCAAATAGCTAGAAAATGGTAGTTTTGGTTTACTAGAACCATCAGCATATTATTTTAGCTCGGTGGAAACTA
AATAAAATTCTTTTCCTCAGGATCCCTCGAGTGGAAATAGGGAACGAAGTAACTAGATTAGACGGATTTGGG
ATAATAGAATCCCCCTTCTCTAGAGGGATCATCTAGAAAGCGAGTGGCTTTGGGTGTCTTTAATAAGAAAAG
CTGACATAGATGTTATGGATCTAATTTTTGTTTCTGGGAATACATCAATTTTCCATAAAGGAGCCGAATGAA
ACAAAATTTTCATGTTCGGTTTTGAATTAGAGACGTTAAGAATGATAAATTAACGTCGACTATAACCCCTAG
CCTTCCAAGCTAACGATGCGGGTTCGATTCCCGCTACCCGCCCCATATTCCCTATTCTATATGCATCATCCA
TTCGAATATGCATTCTTTTTTTTTTTTACCTAAAAAAAATTTCATTTATTTTTCTCAAAAAAAAAAGATAAA
GGGAGAATGCGAAAGAATGAAATAGGAATGAAAAGCGTCCATTGTCTAATGGATAGGACAGAGGTCTTCTAA
ACCTTTGGTATAGGTTCAAATCCTATTGGACGCAATTTTTTTCCATCTATTTTAAAAGTGGCGATACCAAGA
AACCCCTTTTTTGAATGATTTGAATCAGAAATAATTCGCAAGAATAACTCTTGTTCTAACAATAGAATTAGA
GTTATAAATTTATGCTTGTTCCTCAAGTAGAAACAGTTCGGTGTGCTCCTGAATAGCTTCCTTCAAAAAGGT
TTCCGCTTCCTCGGTGAATGTCTTGGTAGAAGATACAATTTCTTGAAATTGAGGTTTATTCTTTTTTAAGTA
GGTACGTAACTTAATGAGAAATTTCTTTATCTGTCCAATTTCTAACGAATCAAGATATCCATTTGCTCCAAT
ATAAATTGTAGCTATCTGTTCTTCCACAGTAAGAGGGTCTGATTGGGATTGTTTAAGCAACTCGCGTAATCG
TTGACCTCTTGCCAATTGATTCTGAGTAGCTTTATCGAGATCAGAAGCGAATTGTGCAAAGGCTTCTAACTC
TGCGAATTGAGCTAATTCCAATTTTAATTTGCCAGCTACTTGTTTCATGGCTTTAATTTGAGCTGCGGATCC
CACTCTGGAAACAGAAATGCCTACATTAATAGCAGGTCGGATTCCCGCATTGAATAAATCGGCAGATAAGAA
TATTTGTCCATCTGTAATGGAAATTACATTAGTAGGGATATAAGCCGAAACATCTCCAGCTTGAGTCTCAAC
TATTGGTAAAGCAGTCATACTCCCTTCACCTAAACTGGAACTTGATTTAGCAGCTCTTTCCAAAAGGCGTGA
ATGCAAATAAAAAACATCTCCTGGATAAGCTTCACGACCAGGCGGTCTTCTTAAAAGAAGAGACATTTGGCG
ATAAGCTTGTGCTTGTTTGGAGAGATCATCATAAATTATTAAGGTATGGCGTTCACGATACATAAAATATTC
AGCTAAAGCCGCACCTGTATAAGGAGCAAGGTATTGTAATGTAGCAGGTGAGTCCGCGGTTTCGGCTACCAC
AATAGTATATTCCATTGCCCCTCGTTCCTGGAAATTAGTCACTACCTGAGCCACAGAAGATGCTTTTTGACC
AATAGCTACATAAACACAAATTACATTTTTCCCTTTTTGATTGAGAATCGTATCTGTGGCTACTGCTGTTTT
GCCGGTCTGTCTGTCCCCAATAATTAATTCTCGCTGGCCACGTCCTATAGGGATCATCGCATCAATAGCAAT
AAGTCCTGTTTGAAGAGGCTCATATACGGAGCGTCTTGAAATAATACCCGGAGCAGGAGATTCAATTAATCG
AGATTCAGAAGCAGAAATTTCACCTCTTCCATCAATAGGTTTAGCCAGAGCATTTATAACACGACCCAAATA
AGCCTCGCTTACAGGTATTTGAGCAATCCTTCCTGTTGCTTTTACAGAACTTCCCTCTTGTATCATCAAACC
ATCACCCATTAATACAACACCAACATTATTTGATTCCAAATTGAGAGCAATGCCTATCGTACCCTCTTCAAA
TTCTACTAATTCACCTGACATTACTTCATCAAGACCATGAATACGAGCAATGCCGTCCCCCACTTGAAGTAC
GGTACCAGTATTCACAACTTTTACTTCTCTATTATATTGTTCAATACGTTCACGGATAATATTACTAATTTC
ATCAGCTCGAAGAGTTACCATTAGTGTCTCTTTTTTCTTTTTCGGAAACAAAGGGAAAAAATAATGCCTAAA
CTCTAAACTAAAGTAAAAAAATAGAAGGGCTAATCAGTTATTTCTTCCATTGCCCCAAGGATTCCAATATTA
GCACTGATGGTATGGAAATGTAACTCGCTATTCAAACAACTATTCAGGGCTCCTATAGCCCCCTGTAAGGCT
TGTTGGAAAACTTGTTGTCGGACCTGATTAATTGCTCTTTGTTGTTCAAAATGAAGGGTTTCATTTTTGTAA
TTTTCTAATTGTTCCAAACTCTCAGAAGTCGCATTAATCAAATTTACTTTTTCTCGTTCTATCTCAGAGTAT
CCATTTATTCGATATTCCTCTGCTTCCATTTCCACTTTCCGTAAACGAGCCCGAGCTCGTTCGAGCTGCTCA
ATGGCCCCTTTACGCAATTCTTCCGAATTTCGAATAGTACTCAAAATCCTCTGTTTTCGATTATCTAATAAA
TCATTTAATGAAAGTAGATTATCTTACCATTAATTTTACAACTTCCATGATCTCTTCCCGAACCAAACATGA
ATCTTTCGATTCATTTGGCTCTCACGCTCAATTTTTTATTTTATGGGCACTTTCATATCTTTTTTTTAATGT
AATGAGCCTATCCTCTCTAGTTCTGTTTGTATGCAAACATATCAAAACCGATACAAGACCAGAATATTATAA
GGACTCTTCCGACCAGACAAAAATCTCTAATTGTCAGCAAAGTTGTTTCTTTATTTGTTCTTTATTTAAATT
TCAATGAAATTTTTATTCAAATCCAAAAATTTATCTTTTTTATACATAGGTCGTCGATTCGGCATTGGATAT
TGGATAATAAAACGCAGGGCGCCCTTTTATTTATTCTAGTAAACGGTTCAAATGATTTTATTGATATGAGTG
TTATATATCATAAAAATTACCAACTATTCTTTTTTTAACCATTTCGATATTAACGTAATGGTAGAAAGAGTA
CCATGTTGTGCCCGGACTTCAAACAGTTTAGCTTTAACCATGTTAATGGTCTCACTTTATTGGTTGATAGAG
AATCAAAGTTGACTTACCAATAAAGAACGAAATGCTATGATTCTTACATATGATTTATTAATTTATTCAGAA
GGAATTCGTCGAGATTGTACACTTTTTTCCTATTTATCTTATTCTAAAAAAAAAATATGTATATAAATAACA
CAAATAAATAAAGTGCAGCCGGTTGGGTCCAACCTATTCTTGAAATATACAACTCGCACACACTCCCTTTCC
AAAAAAAATCAATACACCAAGCACTACACTTAGATTTATTAGATTTGTTGCTAAAATATCGGTATTAAACCC
GAAACTCCCGGCAGATGGCCAGTGGCCTAAGGAAACGAAAGAATCGGTTACATTTTTCATATGCTCTCCTCT
TATAGATAGGACTAACAAAGAACAGAGTTCTTTTTGTATCACTTGACTTGCCCTTTTTTGATCGATTTCTTT
TTCTTAATTTTTTTCTTTGTTTTAAGTTTCCGATAAGATACTTATTAAGTTGGGTCCTAGGTCTTGTAGAAA
TTGCAAAATATTTCCCCTGTTCAAACACTTCCTAAAAAGAAAGAAAAAATTCCATCGTACTAACCGAAGGAC
GGGAAGGAATAAAGCGAGCAAATCCACTAATTCGTCATCCTCAAATCAGTCTTTCCCGGGGTATTGTTCCAA
CAAATACATAATTGTAGGAGTAAAGTAGTGATATAATTCACAGAAGCAAACCGTAACGAATTAATAAAATAA
GAAAAAGTGTGTAATGCACTTTTTTACATTTTCGTTCTAGGATGAAATTAAACAAAAGGATTTGCAAATAAA
AGTGCTAATGCCACAACGAGCCCATAAATGGTTAAAGCTTCCATAAAAGCTAGACTAAGCAATAAGGTGCCT
CTTATTTTTCCTTCTGCTTCTGGTTGTCTCGCAATACCTTCTACGGCTTGGCCTGCAGCAGTACCTTGACCA
ACTCCAGGTCCAATAGAAGCAAGCCCTACGGCCAATCCAGCAGCAATAACGGAAGCGGCAGAAATCAGTGGA
TTCATGATGATAGGTTCCTCGCACCAAAAAAAAATGGTTAATGATACAATCAACCAAGGAATTCTTACTTAT
TTGATCACTAAAAAATATCGAATCGAAGTAACTAAAACTTCGAAAAAAAAATATATAGATAGGGATAAACCC
TATATATAACTAATATATATCTACTATCACATATACATTTGTTTCTTTCATAACGGAAACCGCCCGCGTTTT
TTATTGAATCAGATTCTAGAATAATTCGTCGAAAAATATACAGGAACTGTAGCTGGACTTATAGACATTACA
TATAGACATATATCTAGTGTGATCTCCCCTAACCCATCCTTCGTAATATCGTCTATCTTTCCTCTTAGAACT
CTAGTCATATATACATATGGATTTCTTATTTCTATCTATATATGTATATGTTACCGAACCAAGTATATTTTC
TTGAACCATGCATTGCCTCAGTCGGGGTAAGCTTAAAAAAAGAAGACTCTTTTGAAAACTAATCAATGATGA
CCCTCCATGGATTCCCCTATATAAGCCGCGGCTAAAGTTGCAAAAATGAGAGCTTGAATACCACTTGTAAAT
AATCCAAGAAACATGACAGGGATAGGAACTACTGAAGGTACTAAAGAAACAAGAACAACAACTACTAATTCA
TCCGCCAATATATTTCCGAAAAGTCGAAAACTCAGAGATAAAGGTTTTGTGAAATCTTCTAGGATGTTAATT
GGTAAAAGGATTGGAGTTGGTTGAATGTATTTTCCAAAATAAGCCAATCCTTTTTTGGTAAGACCCGCATAA
AAATATGCCACGGACGTGAGTAAAGCTAAAGCAACAGTAGTATTTATATCATTCGTGGGGGCAGCCAACTCT
CCATGAGGTAACTGTATGATTTTCCAAGGTAAAAGAGCTCCAGACCAATTAGAAACAAAAATAAATAAGAAC
ATGGTTCCAATAAAGGGAACCCAAGGCCCATATTCTTCTCCAATCTGAGTTTTACTCAAGTCTCGAATAAAT
TCAAGAACATATTCAAAGAAATTCTGCCCGTCGGTAGGAATAGTTTGTGGATTCCGAACAGTTATGATAACT
GACCCTAATAAGATAGCAATTACTACCCAAGAAGTGATAAGTACTTGAGCATGAATTTGTAAACCTCCTATT
TGCCAATATAAATGTTGGCCTACTTCTACACCTGATATATCGTAGAATCCTTTGAGTGTTTTAATGGAACAT
GGTATAACATTCATATTGCCCTCTGACAGAAATCAAACTAAAAAAAAATTATTTTGATTCAACCATCTCTTT
TTCAACTTATCTACTTTCATCATTAATCATATATTTAAAATACCAAGAAATCACATAACATAATATCCCATT
TTATCTCTTTTTAAAAATGCAAGACAAGATATAGTAACCAATCTAAGAAATCAAAATAATTAACTAATCTTA
TTATTCTTAATCATAACATAATCATAATCAATGACTTCTTATATAGCTAGAACGACCCTCACAAATTGCGGA
TACTAATTTGTTAAGAATCAATCGGATTAAAGCTATAACGTCATCGTTGATTGGAATCGAAATATCTGCAAG
ACCCGGGTCACAATTTGTATCGATTAAACAAATTGTTGGAATTCCCAAAATGGCACATTCTCGAAGAGCTGT
ATATTCTTTTTGCTGATCAACGATGATTACAATATCGGACAACCCAGTCAGATATTTGATCCCACCCAGATA
TGTTTGCAAAGTCGATAATTTGCTCTTCAACATTGCTGCATCTCTTTTAGGGAGACGGTTGAGTTTCCCCAT
CTTTTGTTCTCCTCTTAAGTCTCTGAACTTATGAAGTCTCGTTTCTGTAGTGGACCAACTCGTTAACATACC
ACCGAGCCATTTTTTATTAACATAATGACATCGAGCCCTTATTGCAGCCGAGACTCCTAAATCCGCTGCTTT
ATTTTTGGTACCAACCATTAAAAAGGTTTTCCTCGACTTGCTGCATCAAAAACCAAATCACAGGCTTCTGAT
AAAAAACAAGCAGTTCTAGTAAGATTTGTAATATGAATACCTTTACGCTTTGCAGAAATGTAAGGGACCATT
CTAGGATTCCATTTCTTAGTACCATGATCAAAATGAACTCCCGACTCCATCATCTCTTCCAAATGGATGTTC
CAATACCTTCTTGTCATTTTTCCCGCGCTTTCTCTTTTTTTTTAGAAATAACTAATTGTTCCTACGGAACCT
TATAATGAGGTTGACCATTGATACATAGTCCGAACTATTAATTTTTTTTTATTACTTACTTCATTTTTTTAC
TTAACAAAACTAGAAAGGAAAAAGAAAAAATATCTGCTTAGGAATTATGAAATCGCGAAAATACATTTTCTA
ATGTGTCATGGAAATTCTTTGGGCTACAAGAACAAAAAAATTCTCGATGGTGTAACAAAATATCTCTCATTT
CCAACTTGAATACATTTTTCTTTTTTATTTCAAAATGAATGTTTTTGTCTTGCCTTGAACGGTGCACTAATT
TTTTAAATCCGGTACCGATAGGGATAATTCCCCCCAGAACTACATTTTCTTTCAGACCCTTCAACCAATCAA
TACGCCCCCGTAGAGCAGCTTTTGCTAAAACTCTAGCAGTTTCTTGAAAACTTGCTTCAGATATGAAGCTTT
GAGTATTCAGAGATGCCCTCGTTATTCCTAATAAAATTGCCCGATAACAGATCGCTTCGTCTAAAGCGCGCC
CTGCTCGTTCTGCTCGCAGCAATCCGATTAATTCTCCAGGCGAAAAAACATTAGACATTCCGTCTTCTGAAA
CCAACACTTTTGATGTTACTTGTCGTACAATAATCTCTAGATGTCTATTATGAATCTGCACCCCTTGAGATC
GATAAACCTTTTGGATCTTATTAACCAAAGAGATATGGCTTTGGGCTATAGTTAGCTCAGCTCCAATTAAGA
ATCCCCAAGGAATTCCAAGAATTCTTGGTATACGTTCATTCCAACCTTCGACTCTCCTTTCAAGGTTCATCG
ATATTGAACCAATCGAACGCACTTCTAAGATTTGTTCCACTTTTGGAAGTCCCTGCGTTATGTCACCAGATC
GGGATTTTTCATATATAAATGTAACTAATGTATCTCCTTCAGAAAGGGTTTCTCCGTAATGTCCGTGAACAG
TCGCTCCTGGAGTAGCCAAATACGGCTTAGCTGATCTTATAACTAAGGAATCAACATGAACAATTAAAATTT
GACCAGATTTTTTTATATGTGTCCCATATTTAACTAGACATAGATTTTCACAAATAAATTGTCCAATGCTAA
TTATTGTGGATGTTTCTTCACAATAATTGTGATGTAAAAAGCACCAATTCAAATGGGATGGATTCAAAATGA
TGGTATTGCATGGGTTGGGATTATAAATCCTTCTATTTTCATCTATTAAACAGTATTTAAGTACTTCAAGTA
CTTGGAAAGTTGCTTTCAAATTATCAAGTATCCAATATTTGTTTACCAAGATCTGATTATGAGTTATTAAAT
AGTAAGCTGAATAAAAGTTCACTATTTTAGATACAATAGTACCTAGGGGACCCAACAAATCCCTAATTAGAA
TTATGGGATTCAATTCTTTTGCCGTGATGTTATATTTCGAACCATTGAATGGACATGGGCCAACTCGAGAAC
AATTGAATGATGACAAAATTATCAAAGCCTTATTTTGATTCAACAATGTACCAATAGTTGCTTGATGCTGAG
TAACTACTGAAATCTGCACTTTCGAAAAAAAGGGGTTGATATTGGTGCAATCTAATCCATTATCGGGGAGCA
ATCCCGAACCCGCCGTATCATACCTTTTTTCGGCATATGAAAGACTAGACTTTACTAACTCAATTTTTATGA
AATTTTGAATCAGATAATTTGCCCTTACCTCAACAAGAGAAGCATAAACTTCTTCTATAGAACCATTTTTTT
CTTGGTCCCAATTCAATACTAAGCAAGTCCGAACTAATTGAATACTTGTGTGAAAAATTCCACGAATTGACT
TTCCGTTTCCATAAAGGATATAATTGACAATTTTAAGTTGGACATTATCTTTTTCCTGCAAGAGATCTTGAG
TGAAAAGTTTTGCTAAATTTATCCCATCAGCTATTTCATATGTGATTACGGGCCGAACCAAAACAAAATACT
TTTTTTTTATGGGTGTGATTCGTTGGACATAAATCCAATTTTTCAAAATTTTTGATTCCTTAGAATTTTTTT
TTTTCATTCCCGGTGGTATTAAAATGCCGCTGTGTCTAGATATCTTATCTGTCTCTCCGGGAAAATGAATAT
CCCCAGAAAAAATTTTCAGTTCAATACTTTTTTTTTTTATCTCCACTCGGACTAATCCACCTACTTGGCTTC
TTGTATTTGTATTTAAAGCGAGTTGTGTATCTACTTCAATGATACTATTGTTCCGGACCATTAGGTACGAAG
ATCCGGGTAAGATATGCACCTCTTCAGGAATAAAAAAAAACCGATCCACTTTCATTTTGTATTTTGGACTAA
ATTCTTTTACTCCTCGATACTCAATCAAATCTTCTTTTTTTACGATTGAATCCACCTCTACGGTCCCATATT
TAGTAATTCCCGAACTGTTTCTTCTATATTGTGGATCGTCAAAATAAGCAAGAATACTATTTCTATGTAAAA
TACCATTTGTGGGTATTTCAATCGAAATACCAAAAGAGGGTATTAGTTCTTTCTCTCCTTCTGGATTATATT
GTAATGGAATGCTAAATCTATTTCTTCGCCTTTTCGCCAATAAATCAGAATTCTCTTGGAGAATCGAAGGAT
ATATAAAATCCAAATGCTTATTGGAGATGATTTGATCAAGTCTTGAATAGTCAAAAATTTCCCTATCTTTTT
TAACAGAAGGATCCAACAATTTATGCCTTACTTGATCATTAGTAATTGAGAAGTCAGAGATATATCTTTCGT
CGACAGAAAAAGAATAAAAATGAATTTGATCTTGATCTTTGTGGAGTGAAAAAGACACTATACTGGATCCGC
GCGGACTTCCTGCTAATAGCCATAAATGACTTGTTTTTGGTAATAGATGAACGTTACTATATGTATATTCGG
GTGCATGGTAGACATTGGTACTCCAGTGCATTTCTCCCTCTGATTCAGAATAAATATGTTTTCGGACCTTCT
CTTTAAAATGAAAAATAGACGTTCCAGTACGAATCTCAGCAATAACTTGTTCAGATTCTACATATTGATTAT
TTTGAACTAAAATCAAACTTTTGGGAGGAATATTCACACTATGTAGAATATCCCGACTCTCAATAGTTACAT
ACAAGTCTATAGAACATAGAAAAGCAGGATGCCCGTGACGGGTACGTGTGGGATGAACCAAATACTCGTTGA
ACTTTATTTTTCCGTTAGAAGGAGCTCGTACATGTTCGGCAGTACCGCCCGTGAATACTCCACCCGTATGAA
AAGTTCTTAATGTTAGTTGAGTCCCTGGTTCCCCAATTGATTGCCCCGCAATAATACCTACAGCTTCCCCCA
ATTCAACCAGATCGCCGTGAGTGGAACTTCTACCATAACATAATTGACAGATCCAAGATGTATTCCTGCAAG
TAAAGGGGGTTCGAATATATATTGGTTGTGCTCGAAAAGTTATGAATTGATTGACAAGTCCAATCCCAATAT
CTTGATTTCGAGTGGCAATGCAGCGTATCCCCATATATATATCGTCCGCTAATACACGACCAATTAGGGTTT
GGACAAAAATTTTTTCTGTCACCCCATTTCGAGGACTCACGGAAATACCTCGGATAGTACCACAATCTGTTC
TACGTACAATAATGTGTTGAACTACTTCAACAAGTCTACGCGTGAGGTATCCAGCATCTGATGTTCGTACAG
CAGTATCCACGACTCCTTTTCGAGCTCCGTAGCAGGAAATTATATATTCTGTCAAAGAAAGTCCTTCACGTA
AATTGCTTTGAATGGGTAAATCAATCATTTGTCCTTGGGGATCCGACATTAATCCTCTCATACCTACTAATT
GATGTATCTGAGATGCATTTCCTCGAGCTCCCGAAAAGGACATTAGATGGACTGGATTAGATGGATCAGTCA
TCCGAAAATTAGGATTCATTTCTTGTCTCAAATATTCACTTGTAGCATACCATATCTCAATGGATTGACGTA
ATTTTTCTACCGCATGTACATTCCCATAATGATGGTGTTTCTCCAAAATAAAACTTTGTTGTTCAGCATCTT
GGACTAACCATCCCTTAGAAGGTATTGTTAAAAGATCATCAATCCCTAATGAAATAGATGTAGCAGTGGCTT
GTTGGAAACCCAGAGTCTTCACTTGATCCAGGATATGTGATGTATATGCCATTCCGAAATGATCTATTAATC
TGCTAATAAGTCGTTTCATAGCAGTTCCATCTATCACTTTATTGTGAAAGACCAGATCGGCTCGTTCTGCCA
TAAGTACCTCCATATTCCGCTGAGTAGGATTCGACAATGGACTTGAGTCAGTGATTCGAAAACTTCCTTTCC
TCAATCTTGATTCACATAGAAATTAAGAAATTCTTATAATACCGATGAAATTGGATAAACCCGACTTCCCAA
GGAAGGACGTCTAATCGAATTTATTTATTTAGATAGCTTAGATAGCGTATAAATATTAGATAGCGTATAAAT
AGGCTCGACAAAACCCCTGTATGGCTTCTTCTATTTCTCGATAAAAAGAAACATGACCAACAGTAGTTCGAA
TGTATATACAATGGATTTCCTTTTTAATACTTCCTACTATTAGATAGTGTCCATAAATCTCATGATAAGTAC
CAAAAGATTCATATTGAACTTCGACGGGAACCTCTTTTGAGCCAATGACACGTTGATCTAGTCGCCACCGGA
GCCAAAAGGGACTGTCTAATTTGATTCGTTTCTGCCGATAAGCCCCAAGTGCATCGTAGGAACTGCCAAAAT
ATGATTCTTTTTCTTTCGTATACTTATAGTTATTATTATCAACTGTTTTATTTTTGTAGTTCGCACAATTAT
ATGGATTATACCTATTTTCACAAATACCCCGCCGATTTCCCATCGTTAATACATAGAGTCCGATAAGCATAT
CTTGACTTGGTACAGAAATGGGATCCCCAATAGCTGGAGACAAAAGATTCATATGAGAAAACATAAGTAAGC
GGGCCTCTGCTTGAGCTTCCAAAGATAAAGGTACATGAACAGCCATTTGGTCCCCATCAAAGTCTGCATTGA
AGCCCTTACAAACTAATGGGTGTAAACAAATAGCGCGCCCCTCCACTAAAATGGGTTGGAACGCTTGTATAC
CCAATCTATGCAGGGTAGGTGCTCTATTCAACAATACAGGATGCCCCTGCATAACTTCTTGAAGTATTTCCC
ATATAATCGGTTCTTTTTCCCGAATTTTACTTTTCGCAATCCCGATGTTAGAAACAATATGTTGTCTAATTA
GACCACGAATTACAAATGTTTGGAAAAGCTCTATTGCTATTTCTCGAGGTAATCCACATTGATGTAATGAAA
GCGAAGGACCGACGACAATGACGGAACGTCCCGAATAATCGACCCGTTTACCAAGCAGAGTCTCACGAAATC
TTCCTTCTTTGCCTTCAATTACATCTGAAAATGATTTGTAAACTTTATTATGACCATCCCTCATTGGTTGTC
CGCGTATCCCATTATCAAGAAGTGTATCCACAGCCTCTTGTACTAATTTTTCCTGACACATTACTAATTCCC
CTGGCGTAGACCTACTTGTTGCTAATAGATCAGTAAGAGTATTGTTCCGATAGATAACTCTTCTATAGAGTT
CATTAATATCTGAACTCATTAGTTTACCCCCATCTATCTGAATGATTGGTCTCAACTCAGGAGGAAGGACTG
GTAATAGACATAAAACCATCCATTCTGGTTCTACATTTGTTCGGATAAAATGTTTAGCTAATTCCATGCGTC
TAACCAAAAAATCCTTTCTTCTTCTAATTTTTCTATCTTCCCATTCGTTTCCAGCGGATTCTTCGTCTCCTA
ATTCCTTCCATTCTACCAATGAATTTTCTATAATAATTCGCAAATCTAAATCGGCTAATTGTTCTCTGATAG
CACCTGCTCCTGTAGAGATTTCTCGGTTTCGAAATATCTCAAAGCCTTGGGTAGTAAAAAAAAGCGGGATGC
TGTATTTCCAGGATTGGATTTCATACTCGAATAAGCCCCGTAATCGTAGGAAAGTAGGTTTTTTAGCTATGG
GCCTAGCAAAAGAAAAATTTAGATAGGTTCCTATAAGATTGGATCCCCCCTTTAAAAATCGGACGTGAAGGT
TTCCTCTCATCCGGCTCAAGTAGTTATACCAAATAAAGAAGGGAGTTTTTTTTTACTTTGTTCGATAAAAAG
AAAAGCCTACAAAGAACTACTCTTTACTCAAGTTCTCCATCCAGTAAGGACTTTATTAATTCATTTTTTTTT
TTTTACTTGCACTTTTGAACTTTCTGAATTTATTATTTACGACAAAATACAATTTTAATGTGAAATTATTGA
GTAGTCTACTTCCCTTCAAATGATGAACCCCCCTTAAATTAAAGGAATACTTTGGGACTCGTAAGGGATTTA
CTTGTCTATATATCGTTTCATTCCATTCGATCTTTTAGGTCCCTACTTACCTCGACGGCTATGTCATTATGC
CCCTTGAAGCATATATGCGATAAATAGACTTCTGTAACCATGTCATATTTACTTGCTTTAACGGAACCTCTC
TCTAAAAGAAATGGAATGGCGCATTCCACTAAAAAATCTTTTTTTTTTCACGAGGTATAACTAGCAATTCCT
ATTTAGCTGTTACGGAATCGACCATGGATCAATTCCCCCTTCATTTGGGGATATTGAATACACCCAGAATTC
TGAGCTTCATGTTACTCCTTCCAAGAACCATGTCAGAGTCGGGGGCATCCCAATCAGATTGAATGGGATGAC
AGTTTAGTAGTGAAAATCTGTAAAATGCGAATTTCGATCAAATCACACATCGCAATATACTAGGCCTTCTAA
TTCCTTAAGGGGTTTATCTAAAAGATTCGCGATATAACTAGGAAGGCGTTTCAAATACCACACATGAGTTAC
TGGACATGCGAGTTTGATGTATCCCATTTGATATCTTCGTATCCGAGAATCAACAAATTCCACCCCACATTC
TTCACAAAATTTCGGGTCCTCTTTTTCCGCTCCGATCACTCGATAATTTCCACAAGCACAAATTCCACTTTT
TATGGGTCCAGAGATTCTTTCACAAAACAATCCATCTTTTTCCGGTTTATTGGTTTTATAATGAAAAGTATA
GGGCTTTGTCACCTCTCCAACTATCTCCCCATTTGGTAGGATTTTGTTGGCCCAAGCCCTTATTTGTTGAGG
AGACACTAATCCAATTCGAAGTTGTTGATGTTTATACCGGTCGATCATAGAATAGAAATTCTGATTCATTCG
GATCAAACTTCCTTCCGATTAATCTGAAAATTCTTTTCAGATACAAGGAAATGGTTCAGTTCCAGAGCCAAA
GATCGTAGTTCTCGAACGAGTAATCGAAAAGATTCTGGGGCATCCTCAGGATTAGGTACTGTTCCTCCAATG
ATCGTAGCACCAAGTAATTCTTGACGAGCTCTAATATGATCAGATTTATAAGTAAGCATCTCTTGTAAAATA
TGAGCAACACCAAATCCTTCTAGAGCCCAAACTTCCATTTCCCCTACTCGTTGCCCCCCTTGCTTAGCCCTT
CCTCTAAGGGGTTGTTGTGTAACAAGTGCGTAATGCCCACTCGAACGTCCATGGATTTTATCATCAACTTGA
TGAATTAATTTTAGGATATAGGACTTGCCTATTAGAACAGGTTGTTCAAAAGGATCTCCCGTTCTTCCATCA
AATATTCTGCTTTTTCCCGGAAACTCGGGTTCAAATACCCATGGGTTTTTTGTTTGCTTACTGGCTTCATAT
AATTCGGAAAACACTAGTTTTCTCGAAGCCTCTTGCTCATATCTCTCATCAAAAGGTGCTATTCTATAATGT
CTCTTTAGTATATCCCCTGCTAACCCGAGCGAACATTCAAATATCTGTCCTACATTCATTCGTGAGGGTACT
CCTAATGGATTGAAGACCATATCAACAGGTGTTCCATCTTGCAAGTAGGGCATATCTTGTCTAGACAAAATT
TTAGAAATGATACCTTTATTCCCATGTCTTCCAGCTACTTTATCACCCACTTTGATTTCACGTTTCTGTAAA
ATATATACACGAATCCTTTCTGGATTATAGCTGGAACCCGTCTTTTTCTGGATCCATCTCACATCAATAACT
CGACCTCTTCCGCCTATAGGTAGTTTTAGAGAAGTTTCTTTTGAAGTGGATACCTGAATGCCAAGTATGGCT
CGTAATAATCTATCCTCGGGGGCATACGAGGATTCGTTCGCTGTCTGAGGTGTTAATTTACCTATTAAAATA
TCGCCGGTTTCTATCCAAGATCCCAGCATTACAATTCCATTTCTGTCTAAATTTCGGAGTAAATGAGCCTCT
AAATGGGGTATTTCCTTAGTAATTCTTTCGGGACCTTGACTTGTCACATGAGTCTGAATTTCATATTTCCGT
ATGTGAAAAGAAGTATAAATATCTTCACACACTAGCCGTTCGCTAATTAGTACTGCGTCTTCAAAATTGTAA
CCTTCCCATGGCATATAAGTGACTAATACGTTTTTTCCTAAAGCGAGTTCCCCACCAACTGTAGCCGCCCCG
TCTGCTAAAATTTGTCCCTTTTTTATACATTTACCCTGCTGAACCTGAGGTTTTTGATGCATACAAGTATTT
TTGTTGGAACGTTGATACATAACTAATGGAATGCTTATAGTGTCCCCATTACTTGATAAAATGATCTTGTGA
GTATCAGTATAAATGATCTTTCCTTCGCGTTCAGCTATAACAGACACCCCCGAATCTAGAGCCGTTTGGCGT
TCCAGCCCAGTTCCAACAATGCACTTCTCGGATCGAGAAAGAGGAACTGCTTGGCGCTGCATATTAGAACTC
ATTAAAGCCCGATTCGCATCATTATGTTCAATAAACGGAATGAGGGAAGCTCCAATAGAAAAATATTGGAAA
GGAAAAATACTTCTAAAACGAATCTGTTCCCATGCAATAGTCAAAAATTCTTGACGGTATCGAGCCGGAACA
ACTTGTTCCTCTTGAACACCCCGATTCAGGGCCAAAGAATTTCCTGCAGCTACCATATAATATTCATCTCTA
TTTGGTGATAAATAAATTATCTGTGCCTCTTTTGATCTCTCAGACATTTCATAAAGCGGACTCTCTATAGAT
CCCCAAGGACCAATTCTCACATGAATAGCTAAAGATCCAATAAGTCCAACATTGATTCCTTCAGACGTGTCA
ATTGGGCAAATACGCCCATAGTGGCTCGGGTGGATATCTCGTATCCGAAAGCTAGCAGTTCGTCCCGTCAAT
CCTCCAGGACCCAAATAACTCAATTTTCGCCCATGAACAATTTGTGTCAATGGATTAGTTCGATCCAAAACT
TGAGATAAAGGGTGTAGGCCAAAAAAGGATTCATAAGTGGTTGTTAATGAAGTTGAAGTTACCAAATTTTGA
GGAGTCGGTATCAATTTATGTCGGATTGCTCCACATATAGTTCCTCGAATCGAATTTTCTAAACGAACAAGA
GCCAATCCGAATTGATCTTGTAACAGATCTGCTACAGAACGAATACGTTTATTTTTCAAGTGATTCATATCG
TCAAATGTACCCATTCCAAATTTAATTCCGATCAAATGATCCGCAGCAGCCAATAGATCTCGTGGTAACAAA
AATGTATTGTTCTGAGGTATATCAAGATTCAGTCTCCGGTTCATATTTCGTCGACCAATCCTTCCTAATTCA
CATTTTTGTTGAAAAAATTTCTTTTGTAATTCCTTACATAAGGACTCAGAAAATACCGGATCCCCACCGACA
CAAGCAAATTGTTGATAAAACTCCAAAATGGCATTTTCTTTGGATCCAATCTTTTTTTTCTCCCTATCATTC
GAGAAAGACAAGAAAATTTCAGGGTAACAAACATTATCTAGAATTTCTCTTAGATTTGAACCCATAGCTGAT
GATAAAACTAGAATAGATATTTTTTGTTTCCTACTTACACGTGCCCATATCCTTGTTCTTCTATCAATTTCT
AATTCCGATCTTCCTCCCCAATCTGATATTATAGTGCTGGTATAAACAGCATTTCCGTTATGATCCAATTCT
GAACGATAGTAAATACCGGGACTTTGCAATATTTGATTGATCACAATTCTGTATATTCCATTTACTATAGAG
GTTCCCAGGGAATTCATTAGAGGAATGTTTCCAATAAAAACAGTTTGTTGTTGCATATCCCTACCGGTTTTC
CAAATTACTCCCGCAGGGACATATAATTCAGAAGAATATGTGAGTGATTCATACACAGCATCTCTTTCCTTT
ATCAGGGGCTCCACCAATTGATACCTTTCCACAAATAATTGAAATTCCATTTCTTGATCTCTATCTTCAATT
TTTGGAAACTTATGAAATTCTTCCGTTAAACCCTGATTAATGAACCTACAAAATCCCTCAAATTGTATCTGA
CTAAATCCAGGTATTGTGGACATTCCCTCATTTCCATTCCGAAGCATCTTAATCTTAAGTTTCCTATTTATT
TTTATTGAAAAAATTCTATTATTGATTCACTATTCATCGACCCATATGGATCGACTTAGCAATAATAGAATG
TATATTCTGTTTACTGAATCACATAAAATTTTAGTCAACTCCATATATCTATTTCAAACGTATGAACGGAGA
TGGAACGGCGGAATAAAGAACATTTTGGGCGCAGGTTCAAATTTTCGACGGGTTAAATTGAGAAAATATTTC
TGTAAAAAAATTCTGTTGCTTACACTTATGGAGCCTTGTTCAAAATAGGTCCAACTTCTACCTAACGTATTA
GTATAATATTACGATCCGCCGGGATACCACAAAAAGGAATGATTGAGATTGAATCTCCTCTTTATATCTATA
AAAATGAAATAAAGACAGAATAATCAGAAGTAGTATAGAGTTTTCCCTTTTTTAACATAAAAAATGGAATTT
CATGTTCCAAAAAGAATTGGCGGATTTTTTTTGGTAGGGAGGGAAATTTATAGAATACACTTGAATTGTGTA
ACTTAATATAAATATACTAAAAAAAAATATATTGTATTTATTAAGTACATGTTGATACGGCTATCTATCCAT
ATATCACATCCTTTCTTGCAATTTCTGGAGCAACATTAACATGGATCACACTCCACCAAAATTCGTATTTTA
TATTCAATATTTCAATCTATTTATTCAATGAAAAATTGAAACATGAGAATTCTCTCTAGGGATATGTACATA
AGAGAGAGACCCGTCTCGGTATCTGGGTAACAATTTGTGTTTTGGGGTTTACATATACACATATATGTTGTT
ATAATTGAAATAGAAAAGTATTTTTTATTGAAAAAAAATGAGATTAGTCATAAATCGGTCATAAATCAATTT
TCTTTTTCCATTCAAGGAAATAAAATTTTATCTCCGATAAAAATTGAGGAACCATTCACAAATTTCAATTTA
AAGACTAATTTAAAGTAAATTATTAATGGTTCCAATTTGCCCTGAATTTTTCAGTCTGTCGCCAGAATTTGA
CTCTATAATAGAAAAGAAACGAGAAGGGAAATTATTAACTGATGTATATTTTGAGATATAATAAATCGAAGA
AAATAATAGAAACCAGATAAAAAAAAAGAATGTGTTTTTGAGGATTAAGTACAACGGGATTCAAGATAAAAA
AAGAGTTAGTAGTAGAAATAGAATATGGCTAATATTTTTATCCATTTTATTTTGGATCGAATTTGGCGGCAT
GGCCAAGTGGTAAGGCGGGGGACTGCAAATCCTTTATCCCCAGTTCAAATCCGGGTGTCGCCTGATCAACCA
AAGATTTTTTATTTCTTATTCTGCCGATCTAATTCGATGAATTATTGTTCCGCAAGAAGTGGAGGCGTGGAC
GTGTCAATACTTGATTTTTATAAACTATAGCATAGGTTTTAGAAAAGACTGTAACTTTTTTTCTTAAAATCT
AAGTCTAGCCCAAATCAAATCGGCAGTAATAGGGATGAAGCAAAAACCTCAATTATTAATTTAATCATTGGT
AATGATTGATTCTCACCATTTATTTCAAAAAATTTTGAAATAAATGGTGAGAATCAATTCCAGAATGGAATT
AAGAACTAAGATCGGAAATCTCGATATACAAAGATTCCTAAGAGGCACCCCATTTTTACTACTAGAATAAAA
GATTATATAAAAGACTAGCATATCAAAATCTCTTAAACAATTTTTAATTTTAAGTAGCGTCTCGTGATTCTG
TTGGGTATTAAATTAGATTGGATACAATGATGGGAAAAAAATTTAGGGCTTGTAGAAAGGCACGAAGATACT
TTGTATTTAAACTCACGAAAGGCTATGAGTGTTCAGACATAGAATCAGAATAGTTGGTCGACTCTTTAGTAA
AGGTAAAAATTGAAAAAAAAAAGAATATATGTATGTAGTAATAGTGGCAGTGGGTTCTACCGATTCTTTCAT
AGAAAGACAGTAAGCTTAGATCAAATAGAAAATAGAGGTATCTGATATATAGTTGTGTATAGAAAAGGCGCG
TGTATCATCTTGTACTTAATACTTCCTGATTCTACCGGAAATCTAAAAATATTGAAACTTGTTGCAAATGTA
TTCATTGAATTGATTTGGTTCATCAATAGTCTTAAGTCAGAATCCTATTTTGACTCTGTGCCATTGATTCCA
CTATGATTATTAAATAATAATTGAATAATTCTTTCATAGAAATAAGGGACATAATTCACATGGATATAGTAA
GTCTTGCTTGGGCTGCTTTAATGGTCGTCTTTACATTTTCTCTTTCACTTGTAGTATGGGGAAGGAGTGGAC
TCTAGTGCTGTGGACACTACAAATACTAAATTGAGTAATCGATTGCTCAATCGAACTGTATCAATTCTTTAT
TAATCGTTTTGCGAAGCCTTGCCTTAAAAAAAAGTATTCGAAATTGTACTGGAATAGAGTAATAAATCATTA
TCATAATTGTATTTTGCAACTCAAATCTACGCATAATAGAAGATTCTTTCCAACCGAATTTTGACTAATTTG
ACTAAATAGTCTATATTTTTTTTCTTTTAGAAAAAAAAATTCTGTTATTATGACACTATATATTTTCTTTCC
ACTGTAAGCGAAACGATTAGTGATTGTCCAAAGAGGTCCTACACATAATAAAATTAGATCTTTCTTCCGTTA
GGCTATTTACATATCACACATTTCACATTTGTTTTAAACTTCTAGAAATTATACTTTTTTGACTCATCTCAT
GTTTTGTTTAAACATGAAAAACGGCCAGGTTTACTCTAACCCCTTTTCCAAATCCGAAGAAGTTATCATATA
ACTACGCGGATCATACATTAATTGTTCAATCAATGACTTCTTGAGATGAAAAAAAAGAAATAGAATTAAAGT
TTTATCTTATCTATATGTACATCAACTATATACATATTGTAATTTTATCTATGAAGCCTATATTAATATTAG
TATACAATACTAGCTAGTGTGGTAGAAAGAACTATATATTATAGTTCTTTCTATCACACTAGCTTAGATACT
TAATAAGCTACTTCTGTTCTGATTCCAGCTCAGCGCAATCATTTCATTTAAGACTTAGAGTTTGAATTCTTT
TCTTTCATTTCTTGAATCATTGAATTGAATTGAACTGCTAAGAACTGATAATTCAAGTTTCATTCAAATTAA
TCATTTTGGCTAACTGTTTTTACATAGATGATAAGTAAAAAAGCAGTAGGAATTAGAATGAACAGTGCAGTA
GCAATAAGTGCGAGAATATTGACTTCCATAATCTAATCTTTTTTTTTTCGCAATAACTTAACTCGGGATCTA
ATCCCATAGAGATGATAAATTTGATTCCTGTAAATTCAATGGGATGAATTGTATCTTGATGATACTGAATCA
GATCAATATTATGAATAAAAATTTCTGATCTATCAAATAAATTTCTCGTTGAGAATTGAATAGTATAACATA
GGGAGATCTTTTATCCATACAAAAAACCATTTTTGATTAGATCATAAATACCTATTATTAGGTTTTCATCCT
TTTTCCACTTGTTCTTTTCTATAACCTAGCATCTTATCTTTCTTATACAATTCTTCTACTTATACATATACA
TAGTATTTTGTATATAGAATTATAAGGTATTATATAACCGGTATTCTCTAGAACATACAGAGAGACGAACAG
TATAAGTATAAGTGAGATCTAAAAAAGGTAAGGTTAAGTCTAAAAAATCGACTATTCAAGCTTTACCTTTAC
TAAGAATAAGAAAAGAAAGGAGCCCTACTTGGTTTTGTTGGTCTTTTATTTTATGTTATTTTATTAGTATAC
TCTTTGTTTTGTTGGATTGGAGTTGGAACGTATACATCAAAAATTCAATATAAAATTGGAATGAGAATGAAA
TAAATTGTTTCAAATCAGTAGTCATAATTGAGGCTAAAAAAAATTTAGATTTAGAAAAGATGTGCTTTAACC
TAAAAAGTACTTTGCCGGAGAATTAAATTCTATGAAGATTAAGTTCATTGTATATCATATAATAAACAAAGC
TATTTTGTGTCTGTACCCCCCCAAAAATCTGAGCACTCTATTCCATTTCATTGATCAAGAGCAGAATGATTG
AAAAAAAAAAGAGTATTGGTATCTCTTAAACTTTAAATACTGAATATAGCAATAGTACCGATTGTACTAAAT
CTACATATATTTTTCCTTATCAATTAGTACTGGGGAAGAAAAGGAACTTTCCATATTTATCTGATGAGACAT
GCGAAACAAAAGAAATAATCTCCACGGTGCGAATTTGTTTGATTCCATTTTGCTCTTCGTCTTCCCTTTCGA
AAAAATAGAGAAATGACTTTCTCAATTCATGAGATCCTAGTTCGGGACTGACGGGGCTCGAACCCGCAGCTT
CCGCCTTGACAGGGCGGTGCTCTGACCAATTGAACTACAATCCCGGCGAGGTGTATAGCATACATATACTTA
GGATTTCATAAGAATATTCTACTCGTCATGTTGGAACGTAACAGATATGCGAATGCTATATTGATATTATAT
CCACATAAACACGGGCTTTAGTGAGAGTGAGACAGATTATTAGTAACTAGTGATTTTTGATTTTATTGTTAA
ATAAAAATAATCAATCTTTCAATGAGATGAAAAAAAAAAGATAGAGAAAAATTTTTCTTTATTTCTCTACGA
AGCAGGCATTACCCTTTCTTTTCTATAGGATAAATTAATTATATCTTACTCATGGGGCGGTGAATTCTTGGG
CCGAGCTGGATTTGAACCAGCGTAGACAGTCGTCAACGAATTTACAGTCCGTCCCCATTAACCGCTCGGGCA
TCGACCCAGGAAGAATTCTTTATATGCTTATTGATAATCCATGATCAACTTCCTTTCGTAGTACCCTACCCC
CAGGGGAAGTCGAATCCCCGCTGCCTCCTTGAAAGAGAGATGTCCTGAACCGCTAGACGATGGGGGCATATT
CGCCCGACCGTCATCATACTATAATGATATTATGAATAGTTTTTTGGAATTGTCAATATAATCTAATGGTAT
GGCTAGATTCAAACAGTCTTTTTATATTCTGATTCTATAGGATTTGAATTTGAATTGAACGTTTTTTTTTTC
TTCAATTTTAACTCATTGCTTCGTTTCTTGTTCAGATAAAATATGCCTATCACTATCTCACATTAAGTCATA
AAATTCAAAAACGAGAAAAATTTTACCCCTTTTCTAGGTAAATAGAATTTATTTTTCCATTATTTCCATTAT
AAGTCTACTGCATATATACATATATGCAGTAGACTCATAATGGAAAATGGCTAAGTCATGAATTGAGCAGGC
CCTTTTAACTCAGTGGTAGAGTAACGCCATGGTAAGGCGTAAGTCATCGGTTCAAATCCGATAAAGGGCTTT
TTTCATGAAACTCGAGTCTTTGTCTTCGTTTTTCATCGAAGAATACAGTACAGATATTTTTGATAATAAAAA
AAAGGCAAACACTATTGTATTATTTATAATATAATGAGTTCTTATAATTATTATTNNNNNNNNNNNNNNNNN
NNNNNNNNNNNNNNNNNNNTAATTATTATTATATTGACTAATTGAACTTAGTGGGTGGGGGCTTCTAGCCTG
TAGTGACATAGTAGTGACATAATAGTCCTCTTTATATCTTATTATTATTTATTTAAATATTCCAGGAAACAT
AACATAAATATTCTAGATATCCAACCCCTATTTATTAATCACAAACCAAAATATTCCTACTTCCCTATTGTT
CCCATCAAACCTACCATAAAAATGGTAACTAAAAAAAAATAAGTGGACCTGACCCATTGAATCATGACTATA
TTGGCTATTCTGATATTTAAATTCGATATATATTAAATTGTAGAAAGCGGGTTTTTTATTTCCTTTTTTAGT
TTCTTAGATCACAAAAGACAAGAATTTGTCGATATTTATGATTTGATTTTCTTGTTAATGGACGCTCTATAG
GAATAAATCACTATTCTTTTCCGATACATATAATATATATATATATAATATATTGAAAAATCCATTTTTCAA
TATCTTTCCTTAATTTCAAAATCTGATTCCCATATTGTTTTGTTGTTTTGTTTCAGCAATGCAAATAGAGAA
CGAACGCGAGAAAGGGACCTTCAGTTCCAGTTTATCATTATTTCATTTAATATTTCATTTAGGGGCAAGAAA
AAAAGAAATTTTCCTTTTTTTGTTGGACTCGTTAAAAGATATACTCTGGAATCTGAGTTACAGGACAATTTA
GGGTTCAAATGGTTATATAGTAAAGACTAGTAAAGACTAGTCGAATTGCACTCATGGATTTACCTAGGTCGG
TTTATCAACCAATAGAAAAAAAAATAATTCTTCTTTTTTTTTTCGAAACCCATTGTATTCTAAAGGGCATGG
AACAACGAATCGTCCATACATAATTGAACTATCGCATGCCCTGAAAATGAGATGACGTGTTCGGAAATGGTT
GAAGTAGTTGAATAGGAGGATCACTATGACTATAGCTCTTGGTAAAATTACCAAAGAAGAAAATGATTTATT
TGATATTATGGATGACTGGTTACGGAGGGACCGTTTTGTTTTTGTAGGCTGGTCCGGCCTATTGCTCTTTCC
TTGTGCTTATTTCGCTTTAGGGGGTTGGTTCACAGGTACAACTTTTGTAACTTCATGGTATACTCATGGATT
GGCCAGTTCCTATTTGGAAGGTTGTAATTTCTTAACTGCTGCGGTTTCTACCCCTGCAAATAGTTTAGCACA
TTCTTTATTACTACTATGGGGACCTGAAGCACAAGGGGATTTTACTCGTTGGTGTCAATTAGGAGGGCTGTG
GACTTTTGTTGCCCTCCATGGTGCTTTCGGACTAATAGGTTTTATGTTACGTCAATTTGAACTTGCTCGATC
TGTTCAACTGCGACCATATAATGCAATCGCATTCTCTGGTCCAATTGCTGTTTTTGTTTCTGTATTCCTTAT
TTATCCATTGGGTCAATCTGGTTGGTTCTTTGCACCCAGTTTTGGTGTAGCAGCTATATTTCGATTCATCCT
CTTCTTCCAAGGGTTTCATAATTGGACATTAAACCCATTTCATATGATGGGAGTTGCCGGAGTATTAGGCGC
TGCTTTGCTATGCGCTATTCATGGTGCTACCGTAGAAAATACTTTATTCGAAGATGGTGACGGCGCAAATAC
ATTCCGTGCTTTTAACCCAACTCAAGCTGAAGAGACTTATTCAATGGTCACTGCTAACCGCTTTTGGTCCCA
AATCTTTGGGGTTGCTTTTTCCAATAAACGTTGGTTACATTTCTTTATGTTATTTGTGCCAGTAACCGGTTT
ATGGATGAGTGCTCTTGGGGTAGTTGGTCTGGCTTTGAACCTACGTGCCTATGACTTTGTTTCCCAAGAAAT
CCGCGCAGCGGAGGATCCTGAATTTGAGACTTTCTACACCAAAAATATTTTATTAAACGAAGGTATTCGTGC
TTGGATGGCGGCTCAGGATCAGCCTCATGAAAACCTTATATTCCCTGAGGAGGTTCTACCCCGTGGAAACGC
TCTTTAATGGAACTTTAGCTTTAGCTGGTCGTGACCAAGAAACCACCGGTTTCGCTTGGTGGGCCGGGAATG
CCAGACTTATCAATTTATCTGGTAAACTACTTGGGGCTCACGTGGCCCATGCCGGATTAATCGTATTCTGGG
CCGGAGCAATGAACCTATTTGAAGTGGCTCATTTCGTACCAGAGAAACCCATGTATGAACAAGGATTGATTT
TACTTCCGCACCTAGCTACTCTAGGTTGGGGGATAGGTCCGGGGGGAGAAGTTATAGACACCTTTCCATACT
TTGTATCTGGAGTACTTCACTTAATTTCCTCTGCAGTCTTGGGCTTTGGGGGTATTTATCACGCGCTTCTTG
GACCTGAGACTCTTGAGGAATCCTTTCCATTCTTTGGTTATGTATGGAAAGATAGAAATAAAATGACGACAA
TTTTGGGTATTCATTTAATTTTATTAGGTATAGGTGCTTTTCTTTTAGTATTCAAGGCTCTTTATTTTGGAG
GCGTATATGATACCTGGGCACCGGGGGGGGGAGATGTAAGAAAAATTACCAATTTGACACTTAGCCCAAGTG
TTATATTTGGTTATTTACTAAAATCCCCTTTTGGAGGAGAAGGATGGATTGTTAGTGTGGACGATTTAGAAG
ATATAATTGGAGGACATGTATGGTTAGGTTCCATTTGTATACTTGGTGGAATTTGGCATATCTTAACCAAAC
CCTTTGCGTGGGCTCGCCGTGCACTTGTATGGTCTGGAGAGGCTTACTTGTCTTATAGTTTAGCTGCTTTAT
CTGTCTTTGGTTTCATCGCTTGTTGTTTCGTTTGGTTCAATAATACCGCTTATCCTAGTGAGTTTTACGGGC
CCACCGGACCAGAAGCTTCTCAAGCTCAAGCATTTACTTTTCTAGTTAGAGACCAACGTCTTGGGGCCAACG
TTGGATCTGCCCAAGGACCCACTGGTTTAGGTAAATATCTAATGCGTTCCCCTACGGGAGAGGTTATTTTTG
GAGGAGAAACTATGCGTTTTTGGGATCTCCGTGCTCCCTGGTTAGAACCTCTACGGGGTCCCAATGGTTTGG
ACTTGAGTAGGCTGAAAAAAGATATACAACCTTGGCAAGAACGACGTTCGGCAGAATATATGACTCATGCTC
CTTTAGGTTCTTTAAATTCTGTAGGTGGCGTAGCTACCGAGATAAATGCAGTTAATTATGTCTCTCCTAGAA
GTTGGTTAGCTACCTCTCATTTTGTTCTAGGATTTTTTCTATTTGTGGGTCATTTGTGGCATGCGGGAAGGG
CCCGTGCAGCTGCAGCAGGATTTGAAAAAGGAATCGATCGCGATTTGGAACCTGTTCTTTTTATGACCCCAC
TTAGTTAAGATTTTTTTCTTTATATCTATTGTTTTTTTCTGTTCTGGCTCGGCTAGGTGGGATAGCCGAGCC
ATGCTTCTTTATTTTATGAAAGATAACAAGTCAATCCAAACGAATAAATAAAAAATGGAATTCCACAATAAA
GAAAAAGGAGAGAGAGGGATTCGAACCCTCGATAGTATCAAAACTATACCGGTTTTCAAGACCGGAGCTATC
AACCACTCAGCCACCTCTCCCAGAGGTAATCTCCATTTTATTTCTACGAATAGAACATGACCATATGAGATG
ATACACTAACTACCTGTATGTAAAAACCTCCCGGATTGAATCTATGTTTCGATATATCTACCTATATACTAT
ATATATATAATATATATGCATGATATAGTATATTATATCCGTTTGTGAAGTAATTACGAAACTCCCTTCGAC
TCCATGTCCGAATAAAATAAAGTGGTAATAAGTTCTAAAAAATCAATTGATTAATTCATGGTAAAATCCCTC
CGCGATGCATTTTATTCCAATTTTAACGAAGCGGGGGATCAAATGGTATAGTTCATTTGTTGGTAACTTGGA
GGATTAAAAATATGACTATTGCTTTCCAATTAGCTGTTTTTGCATTAATTGTGACTTCATCAATCTTACTTA
TTAGTGTACCCGTTGTATTTGCTTCTTCTGATGGTTGGTCAAGTAACAAAAATGTTGTATTTTCCGGTACAT
CATTATGGATTGGATTAGTCTTTCTGGTAGCTATCCTTAATTCTCTCATCTCTTGAACTTCTTTGGCATTTT
CTCGACCCCAAAATGCCATTCTTTCTCCAAATTTTGGATTGTGAGACACATGTAAATTCAATCTGAGTAAAA
AAAATTCTATAAAATTTGTTATTAGTTATAAATTAGCTATTTGGAGACAATAAGAATCTTATCTTAATTGGA
ATCTTACTTTACTAGTATTTATCTATGGCCCTGCGCAAATATGATCCAGACGCATATATGATATATCATATA
TGTCATATATGTGTGGACATATGCATACGTTTCAGAAATGCAAAAATGCGGATATGGTCGAATGGTAAAATT
TCTCTTTGCCAAGGAGAAGATGCGGGTTCGATTCCCGCTATCCGCCCATGATGAAGTAATGTACTATAATTA
GAATAATAAAATAATAAAAAAAAAATGAAAAATTCAGTCAAAATTCAGTATAGTCTATTATGATACTATTAT
GATACTTACTATAATGATATTATAGTAGTCACTATAGCACTTCTATTTATATATTTTTTTTCTAGTAGTTTT
ATCTTTCCTTTTGTTCTTGTTTCCCTCTCATCCAAAAACAAAAATAGTAATTAATTACTAGTTAACAGAATA
ACACAAGACCTAAAAATAAAACTTTTTATTTTTTGTGACAAAAAAAATGTTGCGGAGACAGGATTTGAACCC
GTGACCTCAAGGTTATGAGCCTTGCGAGCTACCAAACTGCTCTACTCCGCGCTAAAGAACTAGGAACTAACG
GGTCAAGAAAGATTGGATATGCCCTCTACCATATCTATACAAATAGAATAGTCTATTTATACAAAATGGTAA
AGAGGGCCCCTCTATGATCTATGATCATAGAGATCCGTACAAACCAGAAACGAGATTTTTATCCTTACCAAC
TGGATCTTGTTGCGCCGGGTAACAAACACGCATGAACTATTTCTCGAAGTACGTGTCCGGATAGTCCAAAGT
CTCGATAGTTAGCTCTAGGTCTTCCAGTCAAAAAACAACGTCGATGAAGACGTATAGATGCACTATTACGTG
GTAAGGATTGCAATTTTCCATGAATTTCCCATTTTTCACTCAACGACGGAACCTTGCTTATTTCTTTTTTTA
AGGATCGACGAATCAAATGATATTTCTGTTCCAATTTCTGTCGTTTCTTCTCCCTCTGAATCAAACATTTTC
TTGCCATAATGTTCAGTTCCTATTATTATCAATAATACAGTTCGGATCCTAGATGTAAAAATAAAAGAAGGG
GGACCACCTCTTCATCGAAAGAAATGAGATTGTTGCTGACACAGTAAAAAAAAGAACTAAATTAACCAAATT
TTCCTGATGTAGAGGCAATCAAGAAAGCTGCATAAGTGAATATATAACCTACAGAAAAATGTGCTAATCCAA
CCAATCTTGCTTGCACGATGGAAAGAGCCACTGGCTTATCTCTCCATCGAATCAAATTGGCCAAAGGTGTGC
GTTCATGAGCCCATGCTAAAGTTTCGATTAATTCCTGCCAATATCCCCGCCAGGAAATTAAGAACATAAATC
CAGTAGCCCAAACAAGATGTCCAAATAAAAACATCCACGCCCATACCGATAAACTATTCATACCAAAAGGGT
TATATCCATTGATAAGTTGTGAAGAGTTTAACCATAGATAATCTCTTAACCACCCCATCAAATAAGTGGAAG
ATTCATTAAATTGTGAAACGTTACCCTGCCATAATGTAATATGTTTCCAATGCCAATAAAAAGTGACCCACC
CAATAGTATTTAACATCCAGAAAACTGCCAAATAAAACGCGTCCCAAGCAGAAATATCACAAGTACCCCCAC
GTCCCGGGCCGTCGCAAGGAAAACTATAACCGAAATCCTTTTTATCTGGCATTAATTTAGAACCACGTGCAT
CTAAAGCACCTTTTACTAAAATCAATGTAGTTGTATGCAAACCTAGAGCAATTGCATGATGAACCAAGAAAT
CTCCCGGACCTATTGTTAAGAAGAGTGAATTATTATTTTCATTAATCGCATTTAACCAACCGGGTAACCATA
TGCTTCGACCTGCATTGAATGCTGGTCCAGTTGTTGAAGATAAGAGTACATCAAACCCATAGGAAGTCTTAC
CATGAGCAGATTGTATCCATTGGGCAAATATAGGTTCGATCAAGATTTGTTTTTCCGGAGTACCAAAAGCGA
GCATGACGTCATTATGAACATAAAGACCTAAGGTATGGAACCCTAGAAAGAGACTGGCCCAACTTAAATGAG
ATATGATAGCTTCCTTATGGTCTAACATTCTTGCCAATACATTATCCTCATTCTGCTCCGGATTATAATCTC
TAATGAAGAATATAGCTCCATGAGCAAAGGCTCCTGTCATTATGAACCCTGCGATGTATTGGTGATGAGTAT
ATAATGCAGCTTGAGTAGTAAAGTCTTGTGCTATGAATGCATAAGCAGGTAAAGAGTACATGTGTTGAGCTA
CTAAAGAAGTAATAACCCCTAAAGAGGCTAGAGCAAGGCCTAATTGAAAATGAATCGAATTGTTGATTGTAT
CATAAAGACCCTTATGTCCACGTCCTAATCGACCCCCCGGAGGAGTATGTGCTTCTAAAAGATCTTTGATAC
TATGTCCAATTCCAAAGTTAGTTCTATACATATGACCAGCAACAAGAAAAATAAATGCAATAGCTAAATGGT
GATGAGCCATATCGGTCAACCATAAACTTTGCGTTTGTGGATGGAATCCCCCAAGAAGGGTTAGAATGGCAG
TTCCCGCTCCTTGGGAGGTACCAAATAAATGACTACTGGAATCAGGGTTTTGGGCATAAAGATTCCACTGAC
CCGTAAGAAGTGGTTCCAACCCTTGGGGATAGGGTAATACGTCTAAGAAATTATTCCATCTTACGTACTCTC
CCCTAGATCCGGGAATAGCGACATGAACTAAATGTCCTGTCCAAGCCAAGGAACTTACTCCAAAAAGTCCTG
ACAAATGATGATTGAGACGAGATTCGGCATTTTTGAACCAGGAAACACTCGGTTTCCATTTAGGTTGTAGGT
GTAACCAACTCGCTATTAAGGATATAGCAGAAAGAAATAATAAAAAAAGAGCTCCGGTATAAAGATCTTCGT
TAGTGCGTAATCCGATTGTATACCACCACTGATAAACACCGGAATAAGCGATATTTACTGGGCCGGTAGCAC
CTCCTCGAGTAAAGGCTTCTACGGCCGGTTGACCAAAATGAGGATCCCAAATTGCATGAGCAATAGGTCTCA
CATGTAAAGGGTCCTGTATCCATGACTCAAAATTTCCTTGCCAAGCTACATGAAACAGATTTCCGGACGTCC
ATAGAAAAATTATTGCTAACTGTCCAAAGTGAGAAGCAAAAATATTCTGATAAAGACGTTCCTCAGTAATAT
CATCATGACTCTCAAAGTCATGTGCGGTAGCAATACCAAACCAAATACGACGAGTAGTGGGATCCTGAGCTA
AACCTTGGCTAAACCTTGGAAATCTTAATGCCATAATGCCTTTCAAATCCTCCTAGCCATTATCCTACTGCA
ATAATTCTTGCTAAGAAGAATGCCCATGTTGTGGCAATTCCACCCAGAAGGTAATGCGTTACTCCTACAGCA
CGTCCTTGTACAATGCTCAAGGCTCTAGGCTGAGTAGCAGGAGCAACTTTTAATTTGTTATGAGCCCAAACA
ATGGATTCAATGAGTTCTTGCCAATAACCGCGGCCGCTGAATAGAAACATTAAACTAAAAGCCCAAACAAAA
TGAGCACCTAAGAAAAAAAGACCATATGCAGATAATGAAGAACCATAAGACTGAATTACCTGAGATGCCTGT
GCCCATAAAAAATCCCGAAGCCAACCATTAATAGTAATGGAACTCTGTGCAAAGTTTCCTCCTGTTATATGA
GTTACCACCCCCTGATCACTTATAGTACCCCAAACATCCGACTGCATTTTCCAACTAAAATGGAAAATGACT
ACTGAAATTGCATTGTACATCCAGAATAAACCTAAAAAGACATGATCCCAGGCGGATACTTGACATGTCCCC
CCTCTTCCAGGCCCATCGCAAGGGAAACGAAAACCGAGATTTGCTTTATCGGGTATCAAACGGGAACTACGA
GCAAATAGAACACCTTTCAGTAGTATCAATACAGTTACATGAATCGTAAATGCATGAATGTGATGGACCAAA
AAATCTGCAGTTCCTAACGGAATAGGTAACAAAGCTACTTTGCCACCTACTGCCACTAACTCACCACCCCCC
CAAGTTAAGCTGGTACTTGTTGTTGCACCGGGAGCTGTTACGCCAGGTGCTAAAGCATGGGTGTTTTGTATC
CATTGAGCAAAGATAGGCTGTAATTGTATAGCGGTATCTGAAAACATATCTTGGGGACGTCCTAAAGCGCTC
ATGGTATCATTATGAATATACAAACCAAAACTGTGAAAACCTAGAAATATACATGCCCAGTTTAGGTGTGAT
ATGATTGCATCGCGGTGCCTAAGGACACGATCTAATAGATCATTGTATCGAGTAGTTGGATCGTAGTCTCTT
ACCATAAAAATGGCTGCATGTGCAGCAGCACCAACTATAAGAAAACCACCGATCCACATGTGATGTGTAAAC
AACGAAAGTTGTGTACCATAGTCAGTAGCTAGATATGGATAGGGGGGCATGGAATACATATGGTGAGCTACA
ACAATAGTTAAAGAACCTAACATAGCTAGATTAAGAGATAATTGAGCATGCCATGACGTTGTTAGGATTTCA
TAGAGGCCTTTATGGCCCTGGCCTGTAAATGGACCTTTATGAGCCTCTAAAATGTCTTTAAGGCCATGACCA
ATACCCCAGTTGGTCCTATACATATGCCCCGCGATCAAGAAAAGAATTGCAATAGCTAAATGATGATGAGCA
ATATCGCTCAACCACAGACCTCCTGTTATTGGATCTAATCCTCCACGAAAACTCAAAAAATCCGCGTATTTT
GACCAATTTAAGGTGAAAAAGGGGGTTGCTCCCTCGGCAAAACTGGGAAAAAGTTGAGACAAAAGATCCCGA
TTCAAGATAAATTCATGAGGAAGTGGGATCTCTTTAGGATCAACTCCAGCGTCGAGAAATTGGTTAATTGGT
AAAGATACATGGATTTGGTGTCCCGCCCAAGAAAGAGACCCAAGTCCTAGTAACCCTGCTAAGTGGTGATTC
AACATCGATTCTACATCTTGGAACCAAGCTAATTTTGGGGCGGCTTTGTGATAATGGAACCAACCAGCAAAA
AGCATTAACAATGCAAAGACCAATGCACCAATTGCAGTACAATAGAGTTGTAATTCACTAGTTATTCCAGAT
GCTCGCCAAATCTGAAAAAAACCGGAGGTTATTTGTATTCCTCGGAAACCACCGCCCACATCGCCATTTAAT
ATTTCTTGACCCACTATTGGCCAAACTACTTGAGCACTGGGTCCAATGTGAGTAGGATCACTTAGCCATGCT
TCATAATTGGAAAAACGGGCGCCATGGAAGTACATACCACTCAGCCAAAGAAAGATAATGGAGAGTTGACCG
AAATGAGCACTAAATACTTTTCGAGAGATCTCCTCCAAATCGCTGGTATGACTATCGAAATCGTGAGCATCA
GCATGTAGGTTCCAGATCCAAGTGGTAGTATCGGGGCCTTTAGCTATTGTTCTTGAGAAATGACCAGGTCTG
GCCCATTCCTCGAAAGACGTTTTTACAGGATCCCTATCTACAACAATTTTCACTTCGGGTTCCGGCGAACGA
ATAATCATTAAGTCCTCCTCTTTCCGGACAACACATACAAAGAGACCCGCCAACAGTCAAGTTTTTAGTGAA
CCTATGAAAGATAGATGAAAGATAGATATTTTTTTTTATAATAATAATTAGTTTCCTTCTTTCCCTATCTCC
CATTCAGCTATTTATTTTAGTTATTCACTAGAGCAATTATGATATTGAAGTCGATCCGGGGCAAGTGTTCGG
ATCTATTATGACATAACGATTAGGTGCCTAACGGACTCTTTTGGCGGAAAATCTTTTCTCGGCGTAATGAAA
AAACTCTTTTTTTTCAACCTAGTCTAATTTATTTCTATCTAAATATAGAAGTGCCCATATAAATCGAATTTC
ATAGAGCATAATACTCTATTACTTACTTTTTTAGTACTTTATTACAAATTACAAGATCTCGTTCATTAAAAT
TAATAAGATACATCGAAGGTATCTTTTCTTAGTTCTACTTCTACTATTATTCTGTACGGTATCCATATCATT
TATACCTATAAGATACCATACAAAATAGAATGATTTTACAAGGAAGGGATATAATGAAATTCTAAATTGGAT
CTTATCATGTCATGGTAATGATCTATTTTATTGGATTGATGGATCCAAGAATAAATTCTACTTAATTAACGA
ATGGTTTTATTCGAAACGTCTCGTGATTTTTAACCAATTATGTGCTTCAATATAATTACCTGGAGTAAGCGC
TATAGCCTGTTTCCAATACTCAGCAGCTTGATCGAACCACGCCTCCGCAATTTCAGAATCACCCTGTAGAAT
GGCCTGTTCTCCGCGGTTGGAATAGGTGGTTCAATTCCTTCCCTTAGAACCGTACTTGAGAGTTTCCTACCT
CATACGGCTCAGCAATCAATTCTTTTTTCGGTATCATCTTATATTTACCCTATTCCCCTAGACTAACTGAAT
TCTATTTATGAGAAATAAATCCCATTTTTCTTGGGTTAACCAGAAAAAATTAATTACATAAGTTTAAAATTC
TAATTGTGATCAATAATTAGTTTTATCTTTTTTCCCACCTTAAGAAAAATGAAACATAGATATCCCCTATAT
CGTTATAATTTTCTGAAAGGTAACTATCTCGGTTTCATATATGAAATTTATATAGAATCTTTGAAAAAGACT
TTCTTCCATAAGAAAAAAGAACTTACTATCTTTGGGATCTGATGCTACACCGCTGCTCAATACTTTAGTGGA
TCGACTCTATTACATAAGTTGATTCCTAACTTTATATATCATTTCATGACATAAGTAAGCAGTTTTTAACTG
TATCGACCCAAAAGCGCGCTAATTGATCTTTACGATGCTTTTTTTATCAATTTGATTCTTTATCCATAGAAT
ATAGTATGTAGGCTTTATCTATTTATTTCCTTTTTTGTTATCATGAGGTTTCTTTCCTTGCTACAGCTGGTA
AAAATCGTTGCTTTGAACGATGCATATGTAGAAAGCCTTTTTTTCTAGTATTGACTAGTTAATTTTATCTTT
TTTCTTTCTTTCTATAGTGGAGATAGTCGCACGTAATGACAGATCACGGCCATATTATTAAAAGCTTGTGGT
AAGAATGGGTTTCGTTCTAATGCCCGGAAATAGTATTCCAAAGCCTTTGTATGTTCCCCGTTGCTTGTGTGT
ATAAGGCCTATATTATAAAGTATATAACTTCGATCATAGGGATCAATTTCTGATCGCGTAGCTTCATAATAA
TTCTGTAAAGCTTCCGCATAATTTCCTTCGGATTGAGCTGACATCCGTTACGGTCGTTCATTTATTTTATTC
AAAAAATCTCCGCTCCAGAACCGTACGTGAGATTTTCATCTCATACGGCTCCTCCCTTCTGTGCATAGTAGT
AAGGGGAATAAGTCATGGAATCTAAATTTCACTATTCTCATTATGAACTGACAGGAGCTGGTATTTTTACAA
GAAATCTCTAGCTAGCCTTCCCGCAAGAGGTTTTTTTAAGACCTATCATATTAGTACTAGATAGAAATGGTA
ACTCCAACGATTTCTTTGTCCTCAACGCTTACTATTTCCAGGAATTAGTCACTTCAACAATCTTTGATGGTT
ATACGAGTATCCAAAGTACGAACGAGATGGATGTTTGTTGTCCCAACCATTCTTGTTAGCCCCGATACCGAT
AAGGAAAAGGGTAATTTTTACCAAAGTTTTTGTGTTGTTGATTCCTAGTGTAGTGCTTCTTCCCCTATGCCG
CCTATTGGTACTAGTGGAGTAGGATTGACCTGCAATACAGAACCTATAGGTATAACCTTTCGTTTAATACTA
AAATCGACAATAAAGGTATTTGAGGCTGGATCAATCGAGGATACACGACAGAAGGAATTGTTCTATCTCCAA
ACTTTACCTTCACTAAGCGTAACTTTATTTCAATAATTTGGTTCTTTATATTCCGAACTGCGTCTTTTTCTC
GTAAGAATTCGTTGAGGGCTAAAAAAATAAGAACAAAAAATCAAATCACACCATCTCTATAATAGGTAAATG
CTTTTTTTTCTCCTGAAGTTGTCGGAATTATTCGTAATAAAATATTAGCTATAATTGAGGAGGTCTTATCAA
TAAAATTTCCATTTATCCGAGATCTAGGCATAATTAGTAATCCATTCTATAATTCTTCTCATTACCCTCTCG
GGGAAAATGATCCCACAAAAAGGAATTGTAGAGTACAAAATAACATAAAAACAGAAAAATTCTTGTGTACCT
TCTGTTCAAATTTTACTTTTTTTTGACAAAGAAAGATGGGAGACTTTTGAATCAGATTGAATTTTATAAAAT
ATCAATTTTGTAGTATACAAATACACGGAACTATTACTATTTCATCTAAGTTAGATAACCAAGGACTTTATT
TTACTATGGATTCTTATAACTCGAATCTAATAACTCAATAAATTTAGATTTGGTTATGACCCCAAAAGGAAA
AGGATGACTAATGATTATACAATTGAATGAAATGTCATAGAAAAATTCATGGTATGATTCATAAATTTATAA
TAGGGTAGATGGATGATAAGAGAGGTTGTTTATAAATATGGAATTGGAAAAGAAACTTTTTTTCCTATGGAC
TCACTATTCACTCGGTTTCTGGTCAATAATAGGATTATATAGGAAAGATGGCCGAGTGGTTGAAGGCGTAGC
ACTGGAACTGCTATGTAGGCTTTTTGTTTACCGAGGGTTCGAATCCCTCTCTTTCCGTTTCTGTTAATTCAC
CATCGTTACCAACTACAATATATCAAATCAAATAAAAACGAATATCATTATATTATTCCAACAGCTTTATTT
GATATAAAATTATGATTCCTAATTACTGTGGTATGGGTACGTAAAAGAAAAATCTTGTGGAAAGAGCAAAAA
AAAAATTCTACTGCGTATCAATTTGTAATACGTGAATAACAAAATACGGATTAAGGCCCTTAGATCTATTTC
CTTCGTCGAAAAAGGGACAGAATTGTCTAAACCCCTTTTCTTGTTATGTTCGTTAGGTTCAAGTCTGACGAG
AATAATATTCTACGACTAACAACTCATTTATTTTTAAACCGATCCATTTATTATCTATTATTTGATTTACTA
AGCCTTTATATTGGAATGAGTCAATAGTCAAATGGTTTGGCACTCCTTCCTGAGGAGATGAAGCAATATAAT
TTTGAATCAGAGCTTTTGATCTTTGTTTATCCTTCGTAGTAATAATATCTCGGGGTTTGCAACGATAACTTG
GTATATCCACTATATGACCATTAACTAAAATATGTCTATGGTTAACTAATTGCCTGGCTCCGGGAATGGTCG
AAGCCATACCCAATCGAAAAAGGATATTATCCAACCGCATCTCAAGTAGTTGTAGTAAAACCTGGCCTGTTG
ACCCTTTGGCTTTTCCAGCGATATGCACATATCTAAGTAATTGTCGCTCTGTCAGACCATAATGAAAACGCA
ATTTCTGTTTTTCTTCTAAACGAATACGATATTGCGATCTTTTCCCGGAACGCAATGGGTTTTTAAGATCAC
TTCCGGATCTAGGTCTTTTACTAGTTAATCCCGGTAAAGCCCCCAGACGGCGTATTTTTTTGAAACGAGGTC
CTCGGTAACGAGACATAAAGTAAAGACTCCTTTTTATTTTATTGAAATTTCATTCATTTTACAGAAGAAATC
AAAATTAAGACTGAACTAAAGAATAAACAAAGCAAAGCGAAATCTATATAGAATGAAATGTATTGTGTTAAT
ATCCAGATTTTTTGTTGTATATATATATATATAGAAAGAAGATTAAGGCTAGAAAGAAGATTAAGGCTCTGT
TTTATGATTTATTATATATATAAAATATAAATCTAATTGGATCTAATCAACTTTTTTTTTTTAGAATTACCA
CGACATAATAGATTAGTGACTCAACGTTTGTAGAAATGGAGAGGAGAGATTCTCAATTATGGAAAAATCGAT
AGAGAAAAAAGCCGGCTATCGGACTCGAACCGATGACCATCGCATTACAAATGCGATGCTCTAACCTCTGAG
CTAAGCGGGCTCACATAACAGAAATAATGCATAGGAATTCAAGAGACTACTAGATCCCCGCTATTAGCTGTA
AAGTTCGTATGAACTATATATATATATTTAATATAAACTATTTAATATAAACTATATATTATATNNNNNNNN
NNNNNNNNNNNNNNNNNNNNNNNNNNNNNNNNNNNNNNNNNNNNNNNNNNNNNNNNNNNNNNNNNNNNNNNN
NNNNNNNNNNNNNNNNNNNNNNNNNNNNNNNNNNNNNNNNNNNNNNNNNNNNNNNNNNNNNNNNNNNNNNNN
NNNNNNNNNNNNNNNNNNNNNNNNNNNNNNNNNNNNNNNNNNNNNNNNNNNNNNNNNNNNNNNNNNNNNNNN
NNNNNNNNNNNNNNNNNNNNNNNNNNNNNNNNNNNNNNNNNNNNNNNNNNNNNNNNNNNNNNNNNNNNNNNN
NNNNNNNNNNNNNNNNNNNNNNNNNNNNNNNNNNNNNNNNNNNNNNNNNNNNNNNNNNNNNNNNNNNNNNNN
NNNNNNNNNNNNNNNNNNNNNNNNNNNNNNNNNNNNNNNNNNNNNNNNNNNNNNNNNNNNNNNNNNNNNNNN
NNNNNNNNNNNNNNNNNNNNNNNNNNNNNNNNNNNNNNNNNNNNNNNNNNNNNNNNNNNNNNNNNNNNNNNN
NNNNNNNNNNNNNNNNNNNNNNNNNNNNNNNNNNNNNNNNNNNNNNNNNNNNNNNNNNNNNTATTATAGCGG
ATCAGTCCTAAGAAAAGTATAAAATAAGGATAAAGATACAACAATAAAAATTATAATCAGACATTCCTCTGA
TTTCGTTCGAAAAAGGATGAAGATAGGACAAAAAAACAATAAGGAAGAATATCGACCCTTCCAGTATTCCAA
AGCACACTCTTAAAATAAAAGGGGAGGGGGACGCATATATATGTGGTATATACCTCTCTATATTGAATTGTG
GATACATCAATGATAGAATAATTTCTGATTGAAACAAAGATGATTCATACAATAGAGGTGGAACGAGAGGGG
ATAGCCAAAAAAATAAAATAGGCATACACAATTTTTTAATATAGGAATCATTATATAATGAACTCAATGGTT
CCAAGATAAATGAAAAAGTTGGGTAAAATTACAACTGGATCCTTGTCTAAAAGTCTAAAAGGGGGATATGGC
GAAATTGGTAGACGCTACGGACTTGATTGGATTGAGCCTTAGTATGGAAACCTGCTAAGTGAAAACTTCCAA
ATTCAGAGAAACCCTGGAACTAAAAATGGGCAATCCTGAGCCAAATCTTTATTTTTTGAAAAACAAGGGTTT
AAAAAAGAGAATAAAAAAGGATAGGTGCAGAGACTCAATGGAAGCTGTTCTAACGAATGGAGTTGACTACGT
TGCGTTGGTAACTTAAATTCTTCTATAACAAAAAATGATTAATCGGACGAGAATAAAGAGAGAGTCCCATTC
TACATGTCAATAGCGACAACAATGAAATTTATAGTAAGAGGAAAATCCGTCGACTTTAGAAATCGTGAGGGT
TCAAGTCCCTCTATCCCCAGTAAAAAGCCCGTTTTACTTCTTTACTATAATTCTCCTTTTTTTTTTATAAGT
GGTTCAAAGAAAACAAAGAAAATTCAATATCTTTCTTATTCATTTTACTCTTTCACAAATAGACCCAAAGTG
AATTATTCACAGCCCATCTCATTTTCCTTACATTCACAAAGAAAGTCTTCTTTTTGAAAATCGAAAAAATTA
GGGAATAGCTCAGTTGTAAAAATTAGGGAATAGCTCAGTTGTGTAGAGCAGAGGCTTGAAAATCCTTGTGTC
ACCGGTTCAAATTTGGCTCCTGAATTGTTGGGATAGCTCAGTTGGTAGAGCAGAGGACTGAAAATCCTCGTG
TCACCAGTTCAAATCTGGTTCCTGACACATAACTAATCGATTGAAAATTTATACCTCTTCAAATTAATTGAA
GCGGGTCAGCATACAATACATATTAATAATCTAGAGCGCAATACATATTTTTTATATAGATGTATAGATCTA
TCTATGTTTGGAGATGGTAATAAAAAAAAATAAATTGTCTAAAAAACTTCCAAGTTTATTTTATAGGAGTTG
AAGGATAGAAAAAGTAAGGATATATTTTATACACAGTAAAAAAATCTGTTCTTTTTTCATTTCGTATTTTCT
TTCCTATTTATTCTATTTCTTCATTCTTGTTTATGCTACTTTCAAGGGTTCATCTAAGTGACATGCGCGGTA
CAAAGTTCATAGTGCAGAACTTTTTTGATTTATCTATTATATTGTTTCTGCTCAAATGAAATTCATAATATC
TTCAAAATTGGGTAATACCAATGAAGTCTTTTTTAGCTTAGTCTTAATACGAATTAGAATCCAGTTATTCTC
TTTCATCTAGAACAAAATAAAAAATATTCCTTGACTTGAATAAAAAAAAAATCTGGAGTCATGTCATATAAG
TGAACATTCGTTTCTTATCATTCAATGAGCATCTTGTATTTCATAAAAATTGGGGGTAATATAGTCCTTACG
TAAGGGCCAGCCTATCCAACTTTCAGGCATCAAGATACGTTTAAGACGTGGATGATTATCATAAGAGATTCC
CAACATATCATAAGATTCCCGTTCTTGAAAATCGGCACTTCTCCAAATCCAGAAAACAGACGGGATTCTAGG
CTTACTTCTTTGGGCAAATACTTTTATGCATACCTCTTCCGGCTTATCTATACCATACCGTATTTTCGTAAG
ATGATACACACTAGCTAAAAATCCGCCAGGTGCTACATCATAGGCACATTGGGAGCGTAAATAATTGTAACC
ATATACATATGAAATGACAGCAATGGAGTCCCAATCCTCGGTTTTTATTTGTAGAGTCTCTATTCCTCGGCA
ATCGAAACCCAAAGATCTATGAATTAGTTCATGCTTGACTAGCCAATCAGATAAACGCACCCCCATCTTCCC
GATTTCTCCCACATTTGTATGAGTATTTACAATTTCCAATGAAATTTTGAAAGATTGACTTGACCCACTCTT
TCTTATTCTGCACAAAGGAACCTTGCCTAATTCACTAATTCATGTGAAGATACTGAATTTTTGGATTTGAAA
AATACTTCAGAGATACTTTCTGAAGTAGATGGTGATTGATAGAGTAATCCTTGATCGTAATTTCCAGTATGA
GTACTACGTCGAACATAAAACTTGTGATTAGTAGTAAAACATCGATTTTCCTGTTGGGACAAAGTTCTATCT
TCAAAGATTTCTCGGGATATCTTCTTACGAAGTTTCGTTATAGCATCTATAACTGCTTCTGGTTTAGGCGGG
CAGCCCGGCAAATAGACATCCACGGGAATTAACTTATCGACTCCCCGAACAGTACTATAAGAATCAGTACTG
AACATTCCTCCTGTAATAGTACAAGCTCCCATAGCAATGACATATTTTGGTTCAGGCATTTGTTCATATAAT
CGTACTAAAGACGGAGCCATTTTCATTGTTACTGTACCGGCTGTTAAAATTAGGTCTGCTTGCCTAGGGCTC
GATCTTGGTACTAATCCATAACGATCAAAGTCGAATCGCGAGCCTATTAATGAAGCAAATTCAATGAAACAA
CAACTGGTACCATAGAGAAGAGGCCATAAACTGGAGAGTCTTGACCAATTCGAAAGATCGTTTAATGTAGTT
GAAATAACGGAATTCGGGGTTGTTTGGTCAAGTAACGGAAAATCAATCAAATTCATAACTGTCTCAATATAA
CCTTTTCCTTCCTTTTTCTTTTTTTTGTTGTCTGAATATTCAGTTAAGACCATTCTAATGCTCCTTTTCGCC
ATGCATAAACTGAACCAACAATTGGGATAAGCACGAAAATGAAAGCTTCTATAAATACGGATACACCCAATA
CATCAAAACTCATCGCCCATGGATAAAGAAAGACCGTTTCAACGTCAAAAACAACAAAAACTAGAGCAAACA
TGTAATAGCGGATTCGGAATTGTAACCAAGCGTCTCCCATGGGTTCTATACCTGATTCATAACTAGAGAGCT
TCTCTGGTCCTTCACTAATTGGGGCTAAAACTCCGGAAATTACAAATGCCAAAATAGGAATAGCAACCGATA
TTATTAGAAATGCCCAGAAAATATCATATTCGTGAAGCAGAAACATAAATGGACTCCTATTAATGTGGAATA
GGTTGAATTATTCGATTTGAATTTCAATTGTAAATTCATCCAGAACTTCTTAAAGGAAAAGGGAATTTTTTT
TGATCAAATAAAACTACATAGTTTAGAGTTTGTTTGCCATGGTGCATGCCTTATTTAAAGATTCATACAATG
GAACCCCACTTACCATTTTTTTTTTTTGATTCCATTTAGATATGGTATCGATATAGGATGTTCCCACCCAAA
GAAAACTCTCTTACTTTATCTCGGTTTCTCTTTTTAAAAAGTAATTCAATTAAATACAAAAAAATAGTATAA
TTAGAATACTAATAAATAAGATTAATTATAGCGTAAGAAATCGTATTAGTATAAATATATTTTTCTAGTGCA
TTTTATATTATAAAAATACAAATATAAAATGCATTAATTTAATTCTTAATCCATTTCCACTTTTTTTTTTTT
CGTTTTGATTGAAAAAAAAAGTGGAATGTGTTAGGGCTATACGGACTCGAACCGTAGACCTTCTCGGTAAAA
CAGATCAAACTAATTATTATCGAAATGATGCGAACTGTTTCAAAGACCCAACATGCATTTTCTTGCATTGGG
CTCTTTCATCAACTGATTGATATAAAGATCAGTTAGTCCACCATATTTTTTCTTTTTTACAGGAAGATAATA
AGATGGCTCCATGTGTTCTGTGATTCATGATTTGTATTCTGATCTAGGAACAATACCAAAGTGTTTCAAAGA
GGGGTTACCTTGACTTAGGTCTGCCTCTGGCCTAGATTAACCTAAGTTAAATGGAATCTCTATCGCTCCGCT
ACAAGAGTCAAATATGAGACTTCATACACCTTAAAGTTCATAGGATAAAAAGAGGTTCTTTTGAGTCCCTTA
TACTCATTATGCCTAGCATTGAATGGGCTGGTATTTACCTTATCAATTAGCAAATCAATGGCAGGTTCTATT
TCATTTGGCACCTGAATTCGCACTCGAATCGGACCAAATCAAATATTTGTCAGGCTATTGTTCTCTTGTTCC
TTCGAATCTATGGTATGGAGTAAGACATCGATTTCTCAATAAGATCAATTATGTTCATTGCATAATGGGCCC
CTTTGAAAAGCATTGGCGCACGTGTAAACGAGGTGCTCTACCTAACTGAGCTATAGCCCTTGTCATAGACAT
CTTAACATATAGAGAATTTCTTGTCAAGATCGGATCCCACATGAGAGTTCTTTAATCCGCTTACTGTTAATG
GATTGGTATTGCGTAGAAAAAATATTCCACCTATAATCCCCGAGGCGATGGGTCCTTTTTTTGTGATGATGA
ATAACCTACTTAACTCAGTGGTTAGAGTATTGCTTTCATACGGCGGAAGTCATTGGTTCAAATCCAATAGTA
GGTAGAACTTATTAGATACCATCAACTCTGGTATCTAATAAGTTTTTCTAGCCATCTTCTTTTTTTTGTTGT
ATCATCTAGAATTGATTGTATTCAATTGGCAGAATCAAAATATGGTATATAATAAAGAACCTCTAAAGAACT
TCTTTTTCTTATTTTTATGTGTGTTTTTTTTACTAGTAGGAAATAACATTAACAGCCTCTACTCGTGTCCGA
GCTCGTCTGAGAGCTAGATTCGCCTCAATTGCTTGTCTCTTTCCCTGAGCTCCACTCAAGTTAGCTTCAGCT
ATTTCAAGAGCTTGTTGAGCCTCTTGCGGATCAATGTCAGTACTCATCTCCGCATCATTTCCTAAAATGGTG
ATCTCATTATTACTTATTCTAGCGAAACCACCCATCAAGGCTACCGTTAACCATTGGTCGTTGAGACGTATT
CTCAAAAGACCTATATCTACCGCTGTGGCAATAGGGGCGTGGTTTGGTAATACGCCAATTTGTCCACTATTA
GTAGATAAAATGATTTCTTTCACTTCTGAATCCAAAATAATTCGATTAGGGGTCAGTACACAAAGATTTAAG
GTCATTTCTTCAATTTGCTCTCCCCTTCTAAGTTCATAGCTTTCGCGGTAGCTTCGTCGATGTTACCTACCA
AATAAAAGGCCTGCTCGGGAAGACTGTCTAATTCCCCAGAAAGGATCAATCGAAACCCCCTAATTGTTTCGG
CGAGACCAACATATTTCCCTGGAGAACCAGTAAAGACTTCTGCCACGAAGAAGGGTTGTGATAAGAAGCGTT
CAATTTTTCGTGCTCTTGCTACAGTTAAACGATCTTCTTCGGATAATTCGTCCAACCCCAGGATAGCTATAA
TGTCCTGAAGTTCTTTGTAACGTTGTAAAGTTTCCTTAACTCTTTGAGCAGTTTCATAATGTTCCTCGCCAA
CGATCCGAGGTTGTAACATAGTTGACGTTGAATCTAAAGGATCGACTGCTGGATAAATACCTTTGGCAGCTA
ATCCTCTTGATAGTACGGTAGTAGCATCTAAATGTGCAAATGTCGTGGCAGGAGCAGGGTCGGTCAAATCAT
CTGCAGGTACATAAACTGCTTGGATCGAAGTTATAGACCCTTCTTTGGTGGAAGTAATTCTTTCTTGTAAAG
AACCCATTTCGGTACTAAGGGTAGGTTGATAACCCACTGCAGAAGGCATTCTCCCTAATAAGGCAGATACTT
CTGATCCCGCTTGAACGAAACGAAAGATATTGTCGATGAATAAAAGCACATCTTGTTCATTAATATCCCGGA
AATATTCTGCCATGGTTAGTGCAGTCAAACCTACTCTCATACGAGCTCCTGGTGGTTCATTCATTTGACCAT
AGACTAGAGCTACTTTTGATTCTGCAATATTTTTTTCATTAATTACCCCAGATTCTTTCATTTCCATGTAGA
GATCATTTCCTTCACGAGTACGTTCACCTACTCCACCAAATACGGATACGCCTCCATGAGCTTTGGCAATGT
TGTTGATCAATTCCATGATAAGTACTGTTTTACCCACGCCGGCTCCCCCAAATAGTCCAATTTTTCCTCCAC
GGCGATACGGAGCTAAAAGATCCACCACTTTAATCCCTGTTTCAAAGATTGATAATTTCGTATCTAACTGTA
TAAAAGCAGGCGCAGATCTATGAATAGGCGATGTTGTACGAGTATCTACAGGACCTAAATTATCAACAGGCT
CTCCAAGAACATTGAAAATTCGTCCGAGAGTAGCTCCGCCGACTGGAACACTTAGAGCAGCTCCTGTATCAA
TCACTTCCATTCCTCTCGTCAGACCATCTGTAGCACTCATAGCTACAGCTCTAACTCGATTATTTCCTAATA
ATTGTTGTACCTCACAAGTCACATTAATTTGCTGACCGGCAGTATCTCGACCTTTAACTACCAAAGCGTTAT
AAATATTAGGCATCTTGCCCCGGGGGAAAACAACATCCAGTACTGGGCCAATAATTTGAGTGATACGTCCTA
GGTTTTTTTCTTCAAGTGTGGAAACCGTAGAACCAGAAGGATTCGGATTGATTTTCATAATATAATAAAGTA
AAATATGTCGAAATTCTTTTGATTGAGAGACTATGGTACATAGTACCAAATTGCAAATAAATTTCTGGTAGC
AGCTTGATTAATTAATTCAATACGAATTAAATGGGAATTAGTACTCGATTTAGTTGGTACCACCCAACCGAA
TAAAATTCAATCGTTTACTCATTAAATTTAAATGAGTAAATTTTCAAGTTCAATCTATTCTTTTTTCAAAAG
ATCAAGTAGATGAATAAGAATTGTGAGTAAGTGAAGTGTGTTTCATTTCTCTATCATTATATTATACAAAAT
ACCATCTATACTCGATTAGATGAAATCTATGAAATTCTAACTCGTGATTCATTATTACGATCTCATTGACTG
TTTTCTTTTCTATATATCTAACTATATATCTATATATAGTATAGTTTAGTTAGTGTCTATTTTTTTTTTTAT
TCCCCTTCTCTTTCATGGATGAATTATCCCTATTTTCACATCTAGGATTTACATATACAACACATATCACTG
TCAAGGGGGAATTTTTCTTAGTATTTTTTTTTTAGATTCAAAATGGAAAGTGCCCAAATTCAATTATAAACT
TGAAAAACAAAGATTGGGTTGCGCCATATATATCAAAGAGTATACAATAATGATGTATTTGGTGAATCAAAT
GCATGGTCTAATAAGAAACTTAATTCATTGATAATATTAGTTGAATATTTTTTGAAAGATTTTTGTCAAAGT
TTTCATTCACGCCTAATCTATATCGAGTAGACCTTGTTGTTGTAAGAATTCTTAATTCATGAGTTGTAGGGA
GGGACTTATGTCACCACAAACAGAAACTAAAGCAAGTGTTGGATTTAAAGCTGGTGTTAAAGATTACAGATT
GACTTATTATACTCCTGATTATGAAACCAAAGATACTGATATCTTAGCAGCATTCCGAGTAACTCCTCAACC
CGGAGTTCCCCCTGAAGAAGCAGGGGCTGCGGTAGCCGCCGAATCTTCTACTGGTACCTGGACAACTGTGTG
GACTGATGGACTTACCAGTCTTGATCGTTACAAAGGACGATGCTACCACATTGAGGCCGTTGTTGGGGAAGA
AACTCAATTTATTGCTTATGTAGCTTATCCTTTAGACCTTTTTGAAGAAGGTTCTGTTACTAACATGTTTAC
TTCCATTGTGGGTAATGTATTTGGTTTCAAAGCCCTGCGAGCTCTACGTTTAGAGGATCTGCGAATTCCCCC
TGCTTATTCCAAAACTTTCCAAGGCCCGCCTCACGGCATCCAAGTTGAAAGAGATAAATTGAACAAGTATGG
ACGTCCCCTATTGGGATGTACTATTAAACCAAAATTGGGATTATCCGCAAAAAACTACGGTAGAGCAGTTTA
CGAATGTCTACGTGGTGGGCTTGATTTTACCAAGGATGATGAAAATGTGAACTCCCAGCCTTTTATGCGTTG
GAGAGACCGTTTCTTATTTTGCGCTGAAGCTATTTATAAAGCGCAAGCTGAAACAGGTGAAATCAAAGGGCA
TTACTTGAATGCAACTGCAGGTACATGTGAAGAAATGATCAAAAGGGCTGTATTTGCCAGAGAATTGGGAGT
TCCTATCGTAATGCATGACTACATAACCGGGGGATTCACTGCAAATACTAGTTTGGCTCATTATTGCCGAGA
CAATGGTCTACTTCTTCACATCCACCGCGCAATGCATGCAGTTATTGATAGACAGAAAAATCATGGTATGCA
TTTTCGTGTACTAGCTAAAGCATTACGTATGTCTGGTGGAGATCATATTCACGCTGGTACAGTAGTAGGTAA
ACTGGAAGGGGAACGTGAGATGACTTTAGGTTTTGTTGATTTATTACGTGATGATTTTATTGAAAAAGACCG
AAGTCGCGGTATTTTTTTCACTCAAGATTGGGTTTCTATGCCAGGTGTTATTCCCGTGGCTTCCGGGGGTAT
TCATGTTTGGCATATGCCTGCCCTAACTGAAATCTTTGGAGATGATTCTGTCCTACAGTTCGGTGGAGGAAC
TTTAGGGCACCCTTGGGGAAATGCACCTGGTGCGGTAGCTAATCGAGTAGCTTTAGAAGCGTGTGTACAAGC
TCGTAATGAAGGACGTGATCTTGCTCGTGAAGGTAATGAGATTATCCGCGAAGCTTGCAAATGGAGTCCCGA
ACTTGCGGCTGCTTGTGAAGTATGGAAAGAGATCAAATTCGAGTTCGAACCAGTAGATAAGATAGATAAACA
GAAATAGATAAACAGAAAATATAAGAACTAAGCGCACATAATTCAGCAATTGCTGTTTGTTCTCCTAATTGA
TTGCAATTAAACTCGGCTCAATCCTTTTTTTTAGGAAAAGGATTGGGCCGAATAAAGAATAAGTATCCTATA
CTATCTATTTGTATAGATCTTTCATATGTACAGATCTTACCTATATAAACAAGATCTAAATACAAGATTAAC
TATGAAATGGAAGAATAAAAAATGCAAGAGTTCTTTTCTTTATTGTTGGATCCTTAATTATGGACCTTGAGG
TTGGTGTAGATCGTTTTTTATCCCGCAGTTTCGGGCCGTAGATCAAGCCAAGGGGGGCTCCTCCTACTCACA
CCCTTTATATTGTCTGTTTCATTTCATGTTGCAATAGAAATTTCTTATTTGATTATATGATACTAGATTCTA
CGAGAATAAATTCTTCATTTATTTATTATTTCATAGTATTTATTATTTCATAGTATAGGAAGAAACAGCTAT
TTATCTTTTCGATGATAATTTTTTTTGTACATGACATGAGAGAAACTTGTCTCTTTATATTTTAAATTGACC
AAAAGATTCTATCATAATATATATTTATATAAGTGATACCTCGGATTTCCCCAAAAGAGAAGTATTTATTTC
AATACTCACTCGTTGTTAGTTAACAATTCTAATTCTTAGGAAATAAAATAGTAAAATGATTATTCATGGAAT
GACTATTCATCTATTCTATTTTCATTAAATAGAATGAGGAGCAGGAAAACTCTATGAAAAAATGGTGGTTAA
ATTCGATGTTGTTTAAGGGGAAGTTAAAACATAAGTGTGAGCTAACTAAATCAATGATATATCCGTTTCTTC
AAATGGGTATTATTCCTGGTGCTTGGCATCCCGGTGGAAGTGAAGAAAAAGATACAGAAAAAAACATTTCTA
GGTGGAGTGATAATAATAGGTATAGTTTCAATGATTTGGTTAGGGACAGCAATGGTGATAGTTATTCTGTAT
ATTTTGACATTGAAAATCATATTTTTGAGATTGACAATAATAGTTTTTTTCTGAGCGAATTCAAAACTTTTT
TTTCCAGTTATTTGAATAGTAGGTCTAAGAGTAACAATAACGACTATTATCATTACATGTATGATACTAAAT
CTGGTTGGAGTAATCACATTAATAGTTGTATTGATAGTTATCTTCGTTTTGAAATCAGTATTCATAGTTACA
TTTTAGGTGATACCGAAAATTACAGTAACAGTTACATTTCTAGTTTCATTTGTAGTGAAGGCATAAGCAATA
GTGAAAATGGAAATTCTAGTATACGAACTAATGGTACCAGCCGCGATTTCAATATAAGAGGAAGATCTAATG
ATTTTGATATAAATAAAAAATACAAAAATTTATGGGTTCAGTGCGAAAATTGTTATGGATTAAATTATAAAA
AATTTTTTAGATCAAAAATGAATATTTGTGAGCAGTGTGGATATCATTTGAAAATGAGCAGTTCAGATAGAA
TCGAACTTTTGATTGACCCGGGCACTTGGGATCCTATGGACGAAGATATGGTCTCCATGGACCCCATTGAAT
TTCATTCAGAGGAGGAACCTTATAAAGATCGTATTGATTCTTATCAACAAAGAACAGGTTTAACTGAAGCTG
TTCAAACAGGCATAGGTCAATTAAATGGTATTCCCATAGCAATTGGGGTTATGGATTTTCAGTTTTTGGGGG
GTAGTATGGGATCTGTAGTAGGCGAGAAAATCACTCGTTTGATCGAGTATGCTACTAATCGATCTCTACCTG
TTATTATTGTGTGTGCTTCCGGAGGAGCACGTATGCAAGAAGGAAGTTTGAGTTTGATGCAAATGGCTAAAA
TATCTTCTGCTTCATATAATTATCAATCAAATAAAAAGTTATTCTATGTATCAATCCTTACATCCCCTACAA
CTGGTGGAGTAACGGCCAGTTTTGGTATGTTGGGAGATGTCATTATTGCTGAACCTAACGCGTACATTGCTT
TCGCAGGTAAAAGAGTAATTGAACAAACATTGAATAAAACAGTACCCGACGGTTCACAAGCAGCTGAGTATT
TATTCCATAAGGGCTTATTCGACCCAATCATACCGCGTAATCTTTTAAAAGGCGTTCTGAGTGAGTTATTTC
AGCTACACGGTTTTTTTCCTTTGAAAAATAGATATATATAATATAGAAATAAAACGAAAATATTAAAATCTA
GAAAAAATAGAAGTGATTTCTATGCCTTGCCTACCAAGAACTTCCATTTTTTATTAGAAATCTAATCCCTTT
TTGTTGGGTTGAATTAGTTTAGTTAGAGTCGCGAACTTATAATAAACTCTTTATCTTTAATAAAAAAAAACT
CTTTATTTTATTAGTAAGATAGAAAGAGTATTAAGGACGGGAGAATTCATAAAATTTCGTAAACTTAAAGTA
GGTTGTCATACATATTCGTGTAGAAAGATGAATAGGTACACTAAATTTTCATTTAGTTCTCATTCCTTGCAC
TTATTAAGTACTTAATATTATTTATCTTAATATTATTTATAATAATTATAATATANNNNNATATAATAGATA
TACTTATGATATCTTTATATTTATAATAGATACAAATATTAAATTGAGGTACCCGTTCTATGACAGATCTTT
ACTTACCTTCTGTTTTTGTCCCTTTAGTAGGCCTAGTATTTCCGGCGATTGCAATGGCTTCTTTATTTCTTC
ATGTACAAAAAAATAAGATTGTCTAGACCTGATGGGGCCAACCAGATATTTTTTTTTGGTACAGATATTTGT
TTAGTGTAATGCGGTATGATATGTGCCTTTTTTCCGAATACAAATGAAAGAACTGTTATGCATGCGGATACA
TGATATCCGTATAAATCCATGTATATACGGGTTATAAAAACGACCGGCAAATATTTTTATAATAGAAAGTCA
ATGTATCTAACCAATTACTCCTAAGGGTTCATATCAGAATAGTTTTAGTTGATGAAAGTTACTTTGGCATCA
AGAAAAGTAAAGTCAATTTTTTTTTCTGAATTCCAATCGAATGCAATCGGATCTAGTATAGTATGAACTGGC
GATCAGAACATATATGGATAGAACTTATAACAGGGTCTCGAAAAGCAAGTAATTTTTTCTGGGCCTTTATTC
TTTTTTTAGGTTCACTAGGATTTTTAGTGGTTGGAATTTCTAGTTATCTTGGTAGGAATCTGATACCTGGAT
TTCCTTCTCAACAAATTATTTTTTTTCCACAAGGGATCGTGATGTCGTTCTATGGGATCGCGGGTTTATTCA
TTAGTTCCTATTTGTGGTGCACAATATCGTGGAATGTAGGTAGTGGTTATGATCGATTCGATAGAAAAGAAG
GAATAATGTGTATTTTTCGTTGGGGATTCCCCGGAATAAATCGTCGCATTTTCCTTCGCTTCTTTATGAAAG
ATATCCAATCAATCAGAATGGAGGTTAAAGAGGGTCTTTTTCCTCGTCGTATTCTTTATATGGAAATCAGAG
GCCAAGGAACCATCCCCTTGACTCGTACTGATGAGAATTTGACTCCACGAGAAATTGAACAAAAAGCTGCCG
AATTGGCCTATTTCCTGCGCGTACCAATTGAAGTTTTTTGAATTTTTATCAAAAGGAACAAATTCGTTCGGA
TTTATCCAATTGAGATATTCGGAAATCCCATTTATTTAAAATTTACTTATTCTATTATAAATATATATATTT
CATTCGAAACGGGATCCTTAATTCTATTTCTATATTCTTTTTTCTAGATCTAAGGACTACATTTTTACAAAA
AACTGGGAATAGATCCATAGGTTCGATACCTTGTTATAGAACTCGTGCTTTAGAGAAATATAAGATCAGATA
AAGTTGACAAATGAAGCAGTTCATTAACAATTCACAGAAAAAAAAATGAAAAAAAAGAAAGCATTGACTTCC
CTCGCGTATCTTGCATCTATAATATTTTTGCCCTGGTGGATCTCTCTCTCATTTCAAAAAAGTCTGGAACCT
TGGATTATTCATTGGTGGAATACTAGGCAATCCGAAAATTTTTTGAATGATATTCAAGAGAAAAATGTTTTA
GAAAAATTCCTAGAATTAGAAGAACTATTCTTGTTGGATGAAATGATAAAAGAATACCCAGAGACACATATA
AAAAAGCTTAGTATAGGAATACACAAAGAAACGATACAATTGGTCAAAACACATAATGAATATCATCTCCAT
ATCATTTTGGATTTGTCGACAAATATAATCTGTTTTACTATTCTAAGTGGTTATTTTATTCTGGGTAATGAA
GAACTTGTTATTCTGAATTCTTGTATTCAGGAATTCTTCTATAACTTAAGTGACACAATAAAAGCCTTTTCT
ATTCTTTTAGTTACTGATTTATGGATTGGATTTCACTCAACCCATGGTTGGGAACTAATGATTGGTTCGATC
TACAATGATTTTGGATTGGCTCATAATGAGCAAATTATATCTGGTCTTGTTTCCACTTTTCCAGTTATTCTA
GATACAATTGTGAAATATTGGATCTTCCGTTTTTTAAATCGCGTATCTCCTTCGCTTGTAGTCATTTATCAT
TCAATGAATGAATGATAAACTTATTTGATTTCCTGATATCAATCAAAAAGTTTTTTCACGTAAAAAAAGGGC
ATTTTTGATTTTTATCATTCTTTATACTTTTCAAGGCCTTCGTCCTGTTTTCGTCGAATTTTTTCAGTACAA
TGGCAGACTCGTGGATAGGGAACTATACTAGCTACCTATCTAATTTATTGTAGAAATTCCGGGATCAATGAT
TGGATCATGCAAAATAGAAATACTTTTTCTTGGGTAAAGGAACAGATGACTCAATTTATTTCTGTATCGATC
ATGATATATGTAATAACTCGAGCATCTATTTCAAATGCGTATCCCATTTTTGCGCAGAAAAGTTATGAAAAT
CCACGAGAAGCAACCGGGCGAATTGTATGCGCCAATTGCCATTTAGCTAATAAGCCTGTGGATATTGAAGTT
CCGCAAGCTGTACTTCCTGATACTGTATTTGAAGCAGTTGTTCGAATTCCTTATGATATGCAAGTGAAACAA
GTCCTCGCTAATGGTAAAAAAGGGTCTTTGAACGTGGGGGCTGTTCTTATTTTACCTGAGGGATTCGAATTA
GCCCCCACCGATCGTATTTCTCCCGAGGTGAAAGAAAAGATAGGAAATCTGTCTTTTCTGAGTTATCGTCCT
AATAAAAGAAATATTCTTGTGATAGGTCCTGTTCCAGGTCAAAAATATAGTGAAATCGTCTTTCCCATTCTT
TCCCCCGACCCTGCTACAAAGAAAGACGTTAACTTCTTAAAATATCCTATATATGTAGGTGGGAACAGGGGA
AGGGGTCAGATTTATCCTGATGGGAGCAAGAGTAACAATACAGTCTATAATGCTACATCCGCGGGTATAGTA
AGCAAAATAGTACGTAAAGAAAAGGGGGGATATGAAATAACCATAGTTGATGCATCGGATGGTCACCAAGCG
GTTGATATTATACCTCCGGGGCCAGAACTTCTTGTTTCAGAGGGTGAATCTATCAAGCTTGATCAACCATTA
ACAAGCAATCCTAATGTAGGGGGGTTTGGTCAGGGAGATGCAGAAATAGTGCTTCAAGATCCATTACGTGTC
CAAGGCCTTTTGTTCTTCTTGGCATCCGTTATTTTGGCACAAATTTTTTTGGTTCTTAAAAAGAAACAGTTT
GAAAAGGTTCAATTATATGAAATGAATTTCTAGATCCAGAAATTCCTTACCATCAAGTTGATAAAAAGCGCC
GAATTCTTGTTGATCAAAAAAATGAAATATGTATTTCTGTAAACTTCCTTAAACTTAAACCTACTTTGCTTT
GTTTTTTGTTTCTAGTATTTTTGCGAGATCTATGGAATTCATTACTTGTATTCCATTTTTAGTACTAGGCAC
TAGCCAATAGGTATACAAAAACAAAGGAAGAAGATACAAGACAAGGACTGGATAAATGAAATGAAAAGAACA
GGTACCTCTAGGAAGGATTATAAGTCTTCCTAATCTTCTATTCGACACAAGAAAAGGTAGAACTCTTTTTTC
TTGTGTCGTCTTGTATCGAAATAATAATGCTTTTTCTCTTGTTCACCAAAGATTAATATTTCTTCTTTTCCG
GATATATCGGAAATCTTTTGTTTAGATTCATACATTCATTATTTTAAATAAATAAAAACATAAGAAATAAGA
AGTCGTAGACAAACAAAAAGTTTTAGAGGGGAGTCATTCATTGAGTAAATGGAGCTTCTTCTTCTATTATTC
AATTAACTTCCACTTTTCATTTATATTATTTATTTTTCAATATTACTAAAAATTTACTTGTTTGGTTGAAAA
GCGGCGCGGATTAGAATCTATTTTTACGCATACCTAAATGCTTATTTTTTATTTTATCTTTTTTTTCTATTT
TATATACAATAAGTTTTTATTTGTTTACTATAAGAAATGTAGAAATGATTTGCAGAATATCTCATCCGTTTA
AATTATCCATATGATATTGGATTACCCCCCAAATAGATTGATTCCTTCTTTCTTGTTGCTTCGTAAGATAAG
AGTTAATGAGTGCCAGAGCCTCTATTATATATAAATCCATCAATAGAAAAAGCTTCTATTCCATTGTGCAAA
AACATCATAAGAAACAAAAGAATAGAGTGGTTTGAAAGATCAGAGCAACGGATCTATTTTAGTATTTATACC
AATAGAAAATTTTGATTATGTTGATTAGATAATTTTCCAATTTGTATGTTATGGAATAGACCAAAGTCTCCT
GCCGCTCTAAGAGTAAGAAAAGAGTAAGAACGCAGCGGTACCTTACCCCTTTTTTGGCAAGGTACCGCCGAG
TTCTTACTTTTTCATGTCTACAATTCGGTTCATTCGATTACTACAGAGATGAACCCAACCCGGAATATGAAC
CGTAAAAGAAAACACCTACTAAACCGATCACAAGAATACCAGTTACAGTACCTATTAGCCAAAGAGGAATCC
TTCCAGTAGTATCGGCCATTTCCCCCACTTTCCTCCACATTTCATCAAGTAGTCATACTATAGACAAAAACA
GTCATGGATAATTATGAAGATGATATCCTTCCGAATGGGATAAGAGAATTCCTACTACTCTCTTTCTTTCTC
TCAATTGAAGAAATAATTGGAAAATAAAACAGCAAGTACAAAAATGAGTAATAAACCCCAGTATAGACTGGT
ACGATTCAATTCAACATTTTGTTCATTCGGGTTTGATTGTGTCATAGCTCTATAATTCGAATTTGGTTTATC
GTTGGATGAATTGCATTGCTGATATTGATCCCAAAAAAGAAACGGTAGGTACAGCTAGTCCGTGAATAGCTA
ACCATCGCACTGTAAAAATTGGATAGGTTCGATCTATGGTCATTGGTGGCCTCCTAACTCCTAAAAGGATCT
ACTAAATTCATCAAGTTGTTCCAAAGAATCAAAACGGCCGGTTATTAATGGAATCCCCTGTCGGCTCTCTGT
GAAATATTCGTTTGGTCGAGGACTTCCAAATACATCGTAAGCTAAACCTGTACTGACGAATAACCAACCCGC
AATGAATAGGGAAGGTATAGTAATGCTATGAATGACCCAGTATCGAATACTGGTAATAATATCAACAAAAGA
ACGCTCTCCCGTGCTTCCAGACATGCTGAACTCCAAAAATTCTTGTACATTTAAAAAAAAAAAGAATCGATT
CGGTGAAAGATGAGATCAGTAAATGGAAAATAAACCACTGATATGTCATCTTTTTTTGTGAGATCGTCAATT
TTGTACCAAAGGTGTATTTCGAGTATACCGAATCAGTATAGCTATCCTTCCGCTGGCGCAGCAACGCAGTCT
CGATCAATATGGAAATGAAATACTACATAATTTCTTTCTTCTTTTTTGTTCTTTGTTTATGCATAATTTTAT
GTTATAGATCAATAGAAAATTAGAAAGTTCCTTATAATTATAATATAAGGTTTTCATTTTCGAATACTTTCA
TTTATTTTAAGTAATTGATTGGTCGTAGAAAAAATATACTATAATAGATAATAGATATAGTAGTATAGTATT
TGATCTAAAAAGAGAATATAGTTGGAATAATCAATAGTCGCAATGCAATCATTGTTACATTAAGATCTAAAA
CAAAGATTCTTTCTTGACCGAACTACAAAACGGAACTCCTTGATATGGAAAAACAGGATATAGAATAAAACC
TAAAATAAAAGGATAAGGGAAGTTGTTCTTCTTCGAATCGAGTTGTCCCCGAAATCAAAAATGGAAATAAAG
GTTTTTTTCTACCTTTCTAATTCTTTTTTTTTTGCTATCTATAATGACTAATGAATTAAGAACTTTCAATTA
GAACTATTTTTTTTTCAATTGATTTTGTCTTACCGTCATATCTGAAAAAATGGAAACTTAGGTAAGTGTTTT
ATCAACGTATGTAGCAAAAGAAGATATCTAATTTAGCTCTTTCATGCCTACTATAACTAGTTATTTCGGTTT
TTTATTGGCTGCTTCAACTATAACTCCAGCTCTATTGATTGGATTGAACAAGATACGACTTATTTGAAATGA
ATTGAATGAACAAATTAATAAAAAAAAATATTTCTCCTTCAGGTATTCTACGGTAACTTCTCATGTCAATTG
TTAATTCTTGGTCTATATTGGTAACTATTGGTCATTGAGATTCGCGGATTTTTCAGATTAATATTTAGGGAT
AGATCATACCTTTCTTTTTATCTCCTCAAACAAATTGAAATGATTGAAGTTTCTCTATTTGGAATCGTCTTA
GGTCTAATTCCTATTACTTTAGCGGGATTATTTGTAACTGCGTATTTACAATACAGACGCGGTGATCAGTTG
GACCTTTGATTGAATAGCATTTTTTCTCGATTGACCTCCTGCAAAGAGGAGGTCAATCGAGAAAAAATGCTA
TTCAACCGTGTTTTGTTAAGTTTTTTTATTATGATTCAAAATAAAAAAAATGGAATCACGCTCTGTAGGATT
TGAACCTACGACATCGGGTTTTGGAGACCCGCGTTCTACCGAACTGAACTAAGAGCGCTTTCTTATGACAAG
AACTACAATTGTAAAGAAAAGTATTTTTTTTTTACCCCAGTCTTGCATACCAATCCATGTAAAAAATGAAAG
ATAATGAATGCCTTATTTTATTTCATTTTTATTTAATTGATCTCACTCAATTAATCTTTCCTTTCGTTACTG
CCCCCTAGGAGAAGTAATAGGTAGGGATGACAGGATTTGAACCCGTGACATTTTGTACCCAAAACAAACGCG
CTACCAAGCTGCGCTACATCCCTTTTAAAATTATTGTACAATGACATTGTACAAAATCCATGTCTTGTTTTC
CATATCGTTATTTTTTTCTGTATCCATATAAAATTTTCTTGTCATTTCTTCTTTTTGGTTTCATATAATAAA
TAATCAAAAATTATATACATCTGATAAAAAAAGAATGCATATTTATTAGAATGCTTAAGAAAAAAGAAAGGG
GTACCCCCTTTCTTTTTTAGGGACAGGGATAGGAAAACCTCATCTACTGCTCATTGTAGATATTTATTTTTG
TTAGGAATTCCGTACAAAAAAGACAAATGATCTTGAACTACAGCATCTGACCATATATGTATTACAATAAAG
AAGGAGGATTTTCAATGCGGGATATAAAAACATATCTCTCCACAGCACCCGTGCTAACTACTCTATGGTTTG
GGTCTTTAGCGGGTCTATTGATAGAAATTAATCGTTTATTCCCCGATGCTTTGTCATTCCCCTTTTTTTAAT
TATAGTTTAAGATCCTATTTTATTTTGGAGAACAGAAATGGAAAAGAGGTTCCTGTATAGGGTAAAAAATTC
CACGAAATCATAGCATAGAAAAAAGGATACTTAAATGAAATACTGGAAAGAATAATTGATAATTAGAAAAAA
TTGTATTACTCACATAAAATTATTATATTCTATTAATTTCTATTAGTATTAATTGAAATTAACTAGTTAGTA
ACTTTTATTTCTATTTATATATATATATTTTTTTTCTTTTTTGTTGTTTTCGTCTTCTTAGATTTAGATTCG
GGTCGAAAATAGAAGAATTAAGTCGATCAAAAATTTAAAGGAGGTTCATGGCTAAGGGTAAAGATGTCCGAG
TTAGAGTTATTTTGGAGTGTACCAGTTGTGCCCAAAATGGTGTCAATAAGAAATTGCCGGGCATTTCTAGAT
ATATTACTCAAAAGAATCGACACAATACACCCAGTCGATTAGACTTGAGAAAGTTTTGTCGTTATTGTCGCA
AGCATACGATTCATGGGGAAATAAAGAAATAGATCGAATGGAACATATGTATTGTATTATTTTTCAAAGGAA
CAGGAAAAAGAAAAACTTAACATATAATATAAATATATAATATACAAATAAAAAAAGAAAACTCATTTCGGT
CAGATCTGAAATGAATAAAGAAATAGAAATTTAGAGATAAGGAATAAACCATGGATAAATCCAAGCAACCTT
TTCGCAAATCCAAGCGATCTTTTCGTAGACGTTTTCCCCCAATTGAATCGGGGGATCAAATTGATTATAGAA
ACATGAGTTTAATTAGTCGATTTATTAGTGAACAAGGAAAAATATTATCTAGACGGGTGAATAGATTGACCT
TGAAACAACAACGATTAATTACTATTGCTATAAAACAAGCTCGTATTTTATCTTTGTTACCTTTTCTTAATA
ATGAAAAACAGTTTGAGAGAGCTGAGTCGATCCCTAGAACGGCTGGTCCCAGAACCCGAAATAAATAGATAT
ACTCTTAGATATACTCTTCCTATTGATTCAAAACTCCAAGCGGAACTCAAGCTCAGATTGATGTTTTGCTCG
AAAAACCTCGAATCCAGATTTGATTATTGTGTTATAAGAAACAACAAATAGGGAAAGAAGAAATCTTTTTTT
TTGAAAGATGTTCGTTCATTCCCACTACTTATCTTAATTTCTTTTTAATTTCTTAAATTCATTTTTATTCTA
TCTTCCCGGAGTTCATTCTCCGGGGAATTCTATTCTGTTTTCGCTATTTATATATATATGATATATGACTTT
TTAATCTCTTTTATTTGCTAATCTTATTGGAAATCATGTAAAGACAATTCTTATTTGATATAGCTATTTGCG
CAAGTATTTTACGATTAAGAAGCAATTGCTTCTTATACAGATTGTGTATGAATTTACTATAACTATAGAATA
CCCTATTCTCACGAGCTGCTGCATTTATTCGAGTAATCCACAAACGACGAAAGTCCCTCTTTTGTCTGCCCC
TATCCCGATGAGAGGAAACCAAAGCTCTCATTTTCTGTTGAGTAGCAGTTCGGGTAAGTCTTGAATGGGCCC
CTATAAAGGTTGATGCAAATAAACGAATTTTTGTTCGACGTCTCCGAGCTATATATCCTCGTCTAACTCTGG
TCATTGAATCAAATTAAACTTTAATGAATAACTAATTGATTTCTTTTCTTTCAGTCATCCTCTTATCCCCCC
TCTCATTAATTAATACCAAAACGGATTATTCCGATATATAAAATATAAATTCCAATGGCTTTTGCTACTATG
ACCTTCCCAACCACGATTTTTTATTCTTTCCGGGTATTTTACCCGGAAAGAATAAATTCTAGCGAAAAAAAA
TAGTGGGTTCCATCGTTTCTATGGTTACTTCGTAAACGGTGAGGTCCTCTCTATACACCGGAGCCTTTTCTT
TCATTTAACCAAATGTTATTGTGAACTTGTATAGTTCACACTCCTTAGTTTAGCTCTACCAATCAGTAATAG
TTCTTTTCACAAAAGGGTTATCCATACAGTGACGGCATTTAATTATGAAAGTTGGCTAGGTAGCTGACCTTG
TTAGTCCGTTCTTTAAAGAATAGGAACATAACCTTTTTGCTTCTTTATAGTACTCTTTCCTCCGCTTAATAG
ATAACTATTTGCTACCAATGGGGAATTATTTCTCATCTCAAACTGAGGTGATTGGATTTGCACCAATGGAAA
CCATAAATTTAATACACAAAAATATAGGTAGATGATGAATCTTTAGCTTTATAGATAGTAAGTTTTTCCATC
CTATCTATCTTTATTCCTTGGTACTGGTGATTGGTACTTGCAAAATTTCTGTATTTATTTTGTTTGAACTCA
TGATCTAAACGAGTCGCACATACACCCGAGTACATGTTCCCCGTCGTTGAGGGCACCCCCTAAGTGCGGGGG
ATTTCGTGATATTTCGTATTGGCTGTCTTGTGTTTCTAATAAGTTGTTTAATTGTCGGCATATCATACATAA
TATATAAAAAAATAGGTTGGTTTAGATCGATCTTAACCTGATTTATTGATGATTATGAATTATTTACATTCA
ATATCAAATCACGGAAAAATAGAATTATGGAGGGAATCATATATTTAGGCGAAATCCCCAATAGTTTCATTT
TCGACCGCTACAAGATCAACAATGCCATGAGCTTGGGCTTCTGTTGCTGACATAAAAACATCTCTCTCCATG
TCTTCGGATATAACCCATAAAGGGTTACCTGTTCTTTGTACATAAACCTTTGTGAGGGTTTCGCGAAGTCTG
AGTAGTTCTTCCGCTTCCAAGATAAATTCCCCTGCTTGTGCCTCATAAAAAGAACTAGCAGGTTGGTGAATC
ATAACCCTGATAATATTGATCTAACATCATGCATGAGCGGTTCTTCTATCTTGAAGAATTGATTAAAGTAAG
GACTAAAAAAAACAAGAAAAAAAATAGAATTGAACGACGGACCGTACAGGCACCTTTTGTGCATTGCATACG
GCTCTGCAATGGAATTTCCTTTTCCCCCTTCTATTTAATTGAAGAAAAAAAAAAAGGAATCCATCCGATCTA
GATTGTTGAATGATCCATTTACCACCCTTCCTTTCATTCATATTGTAATGTAAAAAAAAAATACTATGATGG
TTCTGTTGCTTTCTATATTTATCTCGTCTGTGATTTAGCAATCCCAAAGTTTCTTTTTTTTCGTACTCTTTT
CTTCGTAAGAGAAATATCAGAAAAAGGCTTCTGGTGTGGAAGAAAACGGTTTGTGACGCTGAAATGCACTCC
CGACATAGAAGATCAAGTCGGAAATAACCTTTTTTCATACTACTATCTCGATAGAAAATATCGTGTTAGAAA
AAACAATAATAGTTTGTTCATATCGAACTCGAAGTGCCATGCTATTATTACCTATTATTCATATTCAATATG
GCGAAGGCATAGTCTTCTTCTTCTTTTTTTTTAATAAAAACTCATTGGCGCCAAGCATGGGGGAATGCTAGA
CGTTTGGTAATTTCCCCTCCGACCAGAATGAAGGATCCCATTGAAGCGGCTAATCCCATGCATATTGTATGT
ACATCGGGCGAAACAAATTGCATAGTATCATAAATAGCGATTCCTGGTATTACCCATCCACCAGGGGAATTT
ATAAACAAATAAAGATCCTTAGTATCATCTTCTATACTGAGATATACCATGAGACCAACAAGTTGATTTGAG
ATCTCGCTATCAACTTCTTGTCCTAAAAAAAGTAATCTTTCTCGATAAAGTCGGTTGATTAGGACAAAATTA
TATCCCTTTTGAACCGTACGTGCATCTTTGGATGCATACGGTTCAAAAAAATTGCGAAAATAAAGAATCAAT
GTGTCGATTCCAATCCTATCTCTCTTTTTTTTAAGAGATTCCTGCTTTTCTAATGAAGGGGTTTTTTCTTCC
ATTAAAAAAAGAAAGAGTTTTTACCCCTTCCCTAAAAAAAAAGAATTTACGGAACTTATTTAATTAACCTCT
CATTGATGTATTGTTTCGTCGAGATTTAAATCACGATGTCATTTTCTTGTTCCTGAATGGGCCCTTTGAATT
CTTTTAGGTTCATGTTCTACTCCGGGGAAAGATCTATCCGAATTCTCGTTGTACATATAGGACAAATGATCT
CAGTACCACTTCTTTTTGCTACGAGTTTTTTTTTCAATTCGTTTCATGTCTCCAAAAAACTATTCAATGTAT
TTATTATAATGGTTGACATGGCAGTTTAAGAGTGCTTCTCTAATTAAATAAATAAAATAGAAGAATCTTCTA
TGCATAGCTACAAGCGGTAATTCTACATATATTACTATTACCCATTTGGTATTTTATGAGCAGAGCCTGGAT
ACTCCATTTTTTTAGTCCAAGTTAACCATAAATTCTTCTAATTAAGAATATTGCTCCTCAGTCTAAATTAAT
CTAATTTAACTTCACGCTACGCATAATTGAAGAATCAATCAATACAATATTTCTTGGGCGAAACAGAGGATA
TCTCGATCGGGGGAGAAAATGGGGAAATTCCATATGACCCAATATGTCTGACAAGTCGCACTATACGTCAAC
CCAAACTGCATCTTCCTCTCCAGGACTCCGAAAAGGTACTTTTGGAACACCAATGGGCATTAAATTAAAGAA
AAAATTTAAGTACTATACTTCACTTTAATATGGAAACGTAAGAATGAGTTTATTGTCTTCTTCGAAGGTTTT
TAGAGAAAGATAGAATTAAGAAATAAAAATCTTAATGAAGAGATAGATCGTTCGAATAATAAAAAGGATCCA
TACATTCATTCCCCCAAAATAGGACTAATGCTCCCATTGCGTATTGGTACTTATCGGGTATAGAATAGATCT
GCTTCTCTTTGTTCTTACGAACAGAATTCAGCCGTTATTTTCAACGGAATACAATAAAAAGTAACCTTTTCT
CATACAGAATTCGCTGAAAAGATTAGGTAAATAGTATAAGTCTATTGCAATGCGATAAAGTCACATAGTGTC
TATTTTTCTTTGAGAAAGGGGTATTTCCATGGGTTTGCCTTGGTATCGTGTTCATACTGTCGTATTGAATGA
TCCCGGCCGATTGCTTTCTGTCCATATAATGCATACGGCTCTAGTTTCCGGTTGGGCCGGTTCGATGGCTCT
ATATGAATTGGCGGTTTTTGATCCCTCTGACCCTGTTCTTGATCCAATGTGGAGACAAGGTATGTTCGTTAT
ACCCTTCATGACTCGTTTAGGAATAACCAATTCATGGGGTGGTTGGAGTATTTCAGGAGGAACTGTAACGAA
TTCGGGTATTTGGAGCTATGAAGGCGTGGCCGGAGCACATATTGTGTTTTCTGGCTTGTGTTTTTTAGCGGC
CATCTGGCATTGGGTGTATTGGGACTTAGAAATATTCTGTGATGAACGTACAGGAAAACCTTCTTTGGATTT
GCCCAAAATCTTTGGAATTCATTTATTTCTCTCAGGAGTGGCTTGCTTTGGCTTTGGCGCATTTCATGTAAC
AGGCTTATATGGTCCTGGAATATGGGTGTCTGATCCTTATGGACTAACTGGAAAAGTACAATCTGTAAGTCC
AGCGTGGGGCGCGGAAGGTTTTGATCCTTTTGTTCCCGGCGGAATCGCCTCTCATCATATTGCAGCAGGTAC
ACTGGGCATATTGGCAGGCCTATTCCATCTTAGTGTCCGTCCGCCTCAACGTCTCTACAAAGGATTACGTAT
GGGCAATATTGAAACTGTACTTTCTAGTAGTATCGCTGCTGTTTTTTTTGCAGCTTTTGTTGTTGCTGGAAC
TATGTGGTATGGTTCAGCAACAACCCCAATCGAGTTATTTGGTCCCACTCGTTATCAGTGGGATCAGGGATA
CTTCCAGCAAGAGATATATCGAAGAGTTGGTGCCGGACTAGCTGAAAATCTAAGTTTATCGGAAGCTTGGTC
TAAAATTCCTGAAAAATTAGCTTTTTATGATTACATTGGTAATAATCCGGCAAAAGGGGGATTATTCAGAGC
GGGCTCAATGGATAGCGGGGATGGAATAGCTGTTGGATGGTTAGGGCATCCCGTCTTTAGAGATAAAGAAGG
GCGCGAGCTTTTTGTACGTCGTATGCCTACTTTTTTTGAAACATTCCCGGTAGTTTTAGTAGATGGAGATGG
AATTGTTCGGGCGGATGTTCCTTTTCGAAGGGCAGAATCAAAGTATAGTGTCGAACAAGTAGGTGTAACTGT
TGAGTTCTATGGTGGCGAACTCAATGGAGTCAATTATAGCGATCCTGCTACTGTGAAAAAATATGCTAGGCG
CGCACAATTAGGCGAAATTTTTGAATTAGACCGGGCTACTTTAAAATCTGATGGTGTTTTTCGTAGTAGTCC
AAGGGGTTGGTTCACTTTTGGGCATGCTTCGTTTGCTTTGCTTTTCTTTTTTGGACATATTTGGCATGGCGC
TAGAACCTTGTTTAGAGATGTTTTTGCTGGTATTGATCCAGATTTGGATGCTCAAGTGGAATTTGGAGCATT
CCAAAAACTTGGAGATCCAACTACAAAGAAACAAGTAGTTTGATACAAGACTGCTCTGGTATCTTTATCCTC
TATCTCTATTTTTTTCTCGGGTACCCGAGAAAAAAATAGAGACTTGAATCAACTTCTTTTCGTTGATTCTTT
CCCCTCTTTTTTTATGGTATGGTAAATGATCCCACTCAATCAAACGAATAGATGTGAAAGCTATAATTGTAA
ACCACGATCGAATCTATGGAAGCATTGGTTTATACATTCCTTTTAGTCTCGACTTTAGGGATAATTTTTTTC
GCTATCTTTTTTCGAGAACCACCTAAGGTTCCGACTAAAAAATAATGAAATAATTTTTCATTATAGAAACTG
AAGTAATGGGCCCTCATATCAAGAGGCTCATTACTTCAACAAGTCTAGTCTCCGTGTTCCTCGAATGGATCT
CTTAGTTGTTGAGAGGGTTGCCCAAAAGCGGTATATAAGGCGTACCCCGTAAAGCTTACAAGTAAACCTGAT
ATGAAGATGGCGACTAAGGTTGCTGTTTCCATTTTTAGAAAATTTCAAGATCACAATGGATCTACGATAAGA
TCGTTTATTTATTTACAATTACAACGGAATAGTATACAAAGTCAACCGATCTCAACCAATGATTAAATAGGA
TTTATGGCTACACAAACTGTTGAGGGTAGTTCTAGATCTAGGCCAAGACAAACTACTGTAGGGAGTTTATTG
AAACCATTGAATTCAGAATATGGTAAAGTAGCTCCGGGCTGGGGGACTACACCACTTATGGGAGTTGCAATG
GCTCTATTTGCAATATTCCTATCTATTATTTTGGAAATTTATAATTCTTCCGTTTTACTGGATGGAATTTCA
ATGAGTTAGGTTTATAAGAACTATGAACCTCTAGTTTTTCAATCAAAAAAAAATTTATTTAAAACTTGGATT
TATAGACCTTTTTGGTAGTTCGACTGTGGTATTTTTTTTTTCGGTATTTCCGGAATATGAGCGTGTGACTTG
TTATAATTGATCCTATTGATAATACAGAGAACGGCCCTGTCATCTCTATTAAGATGATTCCACCCCGTCGGA
TATTTATTCTAATATCTGGAACACGGAATATTATAGAAAAAAGTAAGAAAAAAAATATTATAACTATGATTC
ATACCTATTATTTAGACCTCGCAACCGGACTAAAAAAAATTTCAGATGGGTATTTCCTAAATTAAATAATTT
TTCTTTCTTTAGACTTATGAAATTAATTTTATCTGAAGAACAACTTCTTTCTCTAGATTTTGTTGAGTCATT
ACATCCACTCATTGAAATTGAATAATTGATGATCAAATGGTTTTTACTCAAAGAACCCTTTTATTTAGCTTG
GGATTAAATCATCGTGGTTCTTGTATGAATCTGAGGTTTTAATTGATTTATAGGGTCTTAACAAGGGAATTC
CTATCAACAGTAAAACAAAAGTCGACCCGCATTACGCACAAAAAACAACAAATTTAATAACAAAAACAAACA
AAAATAGGAAAGAGAAGATTCAAGAGGCCTGGAACGATCAATATAAAGAAAAAGAAAGGTGTACGAGCTAAC
TTGATATTTTTGGCATTAGCATCACAAAGAAGAGATTTCGGATTTTTTTTACTTCCTATCTTTGGCACAAAT
TGCATCGAGCAGCTAAGAAGTTTTGAACTTTCTATTGCATATCCGTCAAAATAGGTATTTGTGTGTTTCTGT
TTGAGCCGTACGAGATGAAATTCTCATATACGGTTCTCGGGGGGGGGGTCCTCTCGGATTCCCTATCTCAAT
AAAGTATATGATTGGTTCGAGGAACGTCTCGAGATTCAAGCGATTGCAGATGATATAACTAGTAAATATGTT
CCTCCTCATGTCAACATATTTTATTGTCTAGGAGGAATCACGCTTACTTGTTTTTTAGTACAAGTAGCTACG
GGTTTTGCTATGACTTTTTACTATCGTCCAACTGTTACGGAGGCCTTTTCCTCTGTTCAATACATAATGACT
GAAGCTAACTTTGGTTGGTTAATTCGATCAGTTCATCGATGGTCAGCAAGTATGATGGTTCTAATGATGATT
CTGCACGTATTTCGTGTGTATCTTACAGGTGGGTTTAAAAAACCCCGCGAATTAACTTGGGTTACAGGTGTG
GTTCTGGCTGTATTGACTGCATCTTTTGGTGTAACTGGTTATTCCTTACCTCGGGACCAAATTGGTTATTGG
GCAGTAAAAATTGTGACAGGCGTGCCTGACGCTATTCCTATAATAGGATCTCCTTTGGTAGAGTTATTACGT
GGAAGTGCTAGTGTGGGTCAATCTACCTTGACTCGTTTTTATAGTTTACACACTTTTGTATTGCCTCTTCTT
ACTGCCGTATTTATGTTAATGCACTTCCCAATGATACGTAAGCAAGGTATTTCAGGTCCTTTATAGTTATAG
CTTTATTTTATAGAGAAAACAGATCATAGATATTTGTAATTTCTGATATATCCTATCGGGAAGGAACAATAG
TATTTCATTGCTACAAATATGTATTATTGAAAAAATAAGACATGTTTTTTGATACTTCTCTTCAACTCCGAA
GTAGTTTAGTTCTTATTTGATAAGAATAGTTGAAGTGGATTCTCCGAAGAGAGGATGGATGGATTATGGGAG
TGTGTGACTTGAACTATTGATTGGCCCATGCCGATATATTATTTTATCCGCCACGTTGAAATTCACAACCAA
ACGTGTCTCCGCATCCAACCACCACGTAAATCCCCCTATGTAGCATAGGATAGGCCGGTTCGCTTGAGGAGA
ATTTTTTCTATGATCATGTCCGAATTATGTCATGCATGAACAGGCTCCGTAAGATCCTGTAGAATAAGTGAT
GTGGCACGATCCAATGTTTTATCTATCCCACTTACTTATTTATAGTATGGAAATGCATTCATTTCCTCTGCA
TCGACCTCGATCTATAATATGATACTATCGGAGTGAAATAAGAGATCTAAGGAAGAACAGAGGCTAGACTTT
ATTAGTAACAAGTAAAGACTTTGTATGTAAGAAAATCGAGATGTTGTGGGGAAAAAAACGAATAAAATCAAA
AAGACATGAGACAGTCCAAAAAGCCCTTGATTATGATCAAATTTTTAAGCTTACTTGGATATTGAGCATTTA
TCTGTAAGAACTAAATTATTTGCACTGAATATGAATAGGTGCAACTTCAGAAATGGGACCTAATAAATCCTT
TATCACTTACATGGAATCATTCTATTTTATATGTGTGGATATCTATAAAATATAGATTTTCTATCAATCTAT
TTCTGTAATTCTTTTGAATCTTGCTCGAGCCGGATGATGAAAAATTATCATGTCCGGTTCTTTCGGGGGATG
GATCCATAAGAATTCACCTATCCCAATAACAAAGAAACCTGACTTGAACGATCCTGTATTAAGAGCTAAATT
GGCCAAAGGGATGGGGCATAATTATTATGGAGAACCCGCATGGCCCAATGATCTTTTATATATTTTTCCGGT
AGTAATTCTAGGTACTATTGCATGTAATGTCGGCTTAGCAGTCCTAGAACCATCAATGATTGGTGAACCGGC
AGATCCATTTGCAACTCCTTTGGAAATATTGCCCGAATGGTACTTTTTTCCTGTATTTCAAATACTCCGCAC
AGTACCCAATAAATTATTGGGTGTTCTTTTAATGGTTTCAGTACCAACAGGATTATTAACAGTACCCTTTTT
GGAGAATGTTAATAAATTCCAAAATCCATTTCGTCGTCCAGTAGCTACAACAGTCTTTTTGATCGGTACCGC
AGTAGCTCTTTGGTTAGGTATTGGAGCAACATTACCTATTGATAAATCTCTAACTTTAGGTCTTTTTCAAAT
TGATTCGACTGTGAAATACCACGATGTAGGTATCTAGGGAATAGTCGCTTCTAAAGTGAATCCTCCCTAGAT
ACATGAATTTTATTATGATCCATTTCGCGAAAATACGAATTGTGTGTCGAAGATAAAAAATAAAGTAAAAAA
AAAAGAATATGAAAAAATTTCTTTAAAATGAAAACTTATTCTTAGGTAAATGGATTGCGAAATGTTTCTGTA
GAGTGTCCAATATCCGTTTTACATCTTCTGTACGAAAATATTCAATTCTCATAAGATCCTCCTGACTGTTAC
TCAAAAGGTCCAATAATGTATGTATATTGGACTTTTTGAGACAATTATAGGCCCTAGGAGATAGTTCTAATT
GGTCAATAAAAATACATTTCAATGGAATTCCTTTTTTGTTTTTCCTTAGCTTAGTTAATCCATTTTGAAAGG
TAAAAGGAGGTAGAGTAAACCTGTTTTTATTTTCCTCGAAATGAATGTTCCTTTCCTCCGCATGCAGAAAAG
GAATAAATAAATTAATCAAATTACGAGAAGCTTCATAAAGTGCTTCCTTAGGAGTTAAACTTCCATTTGTCC
ATATTTCTAGAAAAAGTATTTCTTGTTTTTCATTTCCATTTCCATAAGAATGAATACTATGATTTGCATTTC
GAACAGGCATGGATACAGCATCTATAGGATAACTTCCGTTTTGAGAGTTATTTGTGGGGTTCATACGGTATC
CGCGATCTCTATTGATTTGTAATCCAATACGCAAATCAATTGGTTCCGTCAGGTTAGCTATATGCTGTGTTG
TGTCAACTATTTCCACGGAAGGCGGTGAGATGATATCTTGAGCGGTTACGTATCTAGGACCTCTAACGCAAA
TGGATGCGTCTCTAACTCCATACAGATTACTTCTCAATACAATTTCTTTCAAATTTATTAAAATTTCATGTA
CCGATTCCTCAATACCTACTATCGTAGAATATTCATGTGGCACTTTCTCAGATTTAGCACGTGTGATACATG
TTCCTTCTATTTCTCCAAGTAAAGCCCTTCGCATGGCAATACCTATGGTATCGGCTTGCCCTTTCATGAGCG
GGGACAGAATGAAACGACCATAATAAAGACGCGTACTGTCTACTCTTGATTCAACACATTTCCACTGTAGTG
TTCGAGTGGATCCTGCTATTTCCTCTCGAACCATATTAAATATTATTATTTGATCAGATCATTGAATCGTTT
ATTTCTCTTGAAATCCATTTAATTCTTTTTTTACACACGTCTTTTTTTGGGAGGTCTACATCCATTATGTGG
CATAGGTGTTACATCACGTACGAAACTTAATAGTATACCACTTCTACGAATAGCCCGTAATGCTGCGTCTCT
TCCGAGACCAGGACCTTTTATCATAACTTCTGCTCGTTGCATACCTTGATCTACTACAGTACGAATAGCATC
TAAAGCGGCTGCTTGCGCAGCATAGGGTGTTCCCCTTCTTGTGCCTTCGAATCCAGAAGTACCGGCGGAGGC
CCAAGAAACCACTCGACCTCGTACATCTGTAACAGTTACAATGGTATTGTTGAAACTGGCTTGAACATGAAT
AACTCCTTTTGGTATTCTACGTCCAGTCTTACGTAAATTAATACGCCCATTCCTACGCGAACCAATTCTTTG
TATAGGTTTTGCCATATTTTATCATCTCATAAATATGAATCAGAAATATATAAAAAGATATGGAGATATCCA
TTTTATGTTAAAACAAATCTTTTATTTTTACATAACCACTCTTTGAGAAACTTTAGAAAGATTATCCTTGTC
TCTGTTTATGTCTCGGATTGGAACAAATTACTATAATTCGTCCGCGCCTACGGATCAGTCGACATTTTTCAC
AAATTTTACGAACGGAAGCCCTTATTTTCATATTTCTTACTCCTTACTTTAATTTTTAATCTATTCCTTGGA
AGAAAATAAGTCTCTTGTTTTTTTTTTGCTTCAAATTGTATCTTTGATGAAAGGGATTTTTTCAAAAAGAAT
CCATCTAATCGTTCGAATCTTTGTTCCGAAGTCTATAAATTATACGTCCCCTGGTTGAATGAATAATATTGC
CTTATTTTTATTTTGATTCTATCTCCCGGCAGTGTTTGTATCAAACTGCGTCGTATCTTCCCCGAAATATAA
CCTAGAATTAGATCTTCATTATATAAAATATAAACGGATTCAGAGAGCATACCATTGGGAAATGATTCAGTA
ATTAAACCTTCATGAATCATTTTTTTTTTTTATTCCAGGAAACCTTTTTGAAGTATCAACTAATGGAGGAAG
AGTTATATAACTCACCTTTCCCCTCTATTTCACAAATAGGAAGTTAGAGATAAAATTAGGATACCAGAGGAG
GATCACCATATATAACACAAAATTTCTCCTCCAATTTTTTCTAGTCTAGCTTCTCGATCTGTCATTATGCCT
CGAGAAGTGGAAAGAATTACAATTCCCATTCCACCTAAAATCTTAGGAATTTTTTTATAGTTGGAATAAATT
CGTAGACCGGGTCGACTTATACGTTTTAAAATCGTTTTATATATTCCTTTCCTAGTTCTTTTATGGCGCAAG
GTTGAAACCAAGAAATTTTTATTACTTTCCTGATGTTTCCGAACATTTTCAATAAAACCCTCTCGTAGGAGT
ATTTTAACAATGTTTTCGGTGATATTTGTGGATACTATTCGAACCGTTCCATTTTTACTCATGTTAGCATTT
CTTATAGAAGTTATTATATCAGCAATAGTGTCTCTGCCCATGACGAATTATAATTATTGGTGCTTCCTAATT
TTGATATAATCAACATGTTTTTTATTTGAATACTTCAAAGTATTCATTATTTAATTAAATTTGAAATTTATT
ATTAAATTAATTATTAAATTTAGTAAAAGTATATGCGTGAGACACAATCTATTAATTGGGTTTATTTCAGAT
ATCCTACTAGAACAATATCCTAATTTGATCTATGACTATGAGTTTGATCTATGACTATGAGTCTTTATAATA
CCTCGGGAGCTAATGAAACTATTTTAGTAAAATTCAACTGTCTCAATTCCCGAGCAATCGCGCCAAAAACTC
GAGTTCCTTTTGGATTTCCTTCTTGATCAATGACAACCGCTGCATTGTCATCATATCGTATTATCATACCGT
TGTCACGTTTGAGTTCTTTACATGTACGTACAATTACAGCTCTTATTACTTCTGATCTTTCTAGAGGCATAT
TGGGCACTGCTTCTTTAATTACAGCAACAATAACGTCACCAATATGAGCATATCTATGATTACCAGCTCCTA
TGATTCGAATACACATTAATTCTCGAGCTCCACTGTTATCTGCTACATTCAAAAGGGTCTGAGGTTGAATCA
TATCATTTTGATTTGAATTTTTTATTTCAATGCAAAGAATGAGGAAAAAGAAGAAATAGTATTTGTCTAGAA
ATAAAGAAACTCGTGGTTGTTTTTTCATCCCTTTTTTATATTTAGTTCTACATCCCTATCCTGAAATAACAA
ATTGAGTTTTTATAGGCATTTTGCACGCAGCTATTGAAATTGCTGCTCTGGCTACAGTTTCTGAGACTCCGC
CCATTTCGTAAAGTATTCGACCGGGTTTAACAACAGATACCCAATATTCTGGAGATCCCTTTCCCGACCCCA
TACGTGTTTCTGCGGGCCTTACTGTAATAGGTTTATCGGGAAAAACACGTACCCATATTTTTCCACCACGAC
GCGCATATCGTGTCATTGCTCTTCGTCCTGCTTCTATTTGTCTAGCGGTAATCCAAGCGGGTTCAAGTGCCT
GAAGAGCATATCTGCCGAAGCAAATATGATTACCCCGGCAAGATATTCCTTTCATTCTTCCTCTATGTTGCT
TACGAAATCTGGTTCTTTTGGGGTTATAGTTGATGGTTTTTTCCCACCTCTACTACAGAACCGGACATGAGA
GTTTCTTCTCATCCAGCTCCTCACGAATGAAAGGATTCGATAATATTACAGATGCACATGTATTTAATAACT
AATACATTAAACTAAGTAATGGTATTTATTGATATTATATTTCATTTATTAGATAAGAAGCTGTATATACGG
TTAGATTTGTCTATTTCTAGATATAGATAATGTTTCTTTTTTATACCGGATCCTTATTTTTTTTTTTACTTT
TCTTTTAATAAATTATTGAATCAAGACAATATTGGAATCCAATAAATAAGAAATAAGGGTTTCGCGGGCGAA
TATTGACTCTTTCCTTTTCCTGCTTTATTCGTAGGATCAATCCACAACCTCGCCGAGTAAAAAAAAAATTGT
TCTTGGTTCATTCCGCCATCCCGCCTGCTCAATCATTTGGATTCTTTTAAATAGAATCCTATATAGTCACAG
GTTTCGTCGTTCCTATAGCTTCTCCATTAATGATTAGGCCTGAACTCTGCAATGGAGCTCTCAACAAAATCT
GTTTCCGAGTCAATCTCCTCAGTTTCTATTAACCGGGAGCTCTTTATTATTTATATATCATTTATTATTTAT
ATATCAATCGATACAATATTAAACAATATTAAAACAATATGAAATTAATGCTTTATTACACTGCCTTTTATT
TATATGAGGTAATTCATAGACCATACATATTGGAATTATATATCATTGATATTTTTATTCTCTCTTTCTATC
ACCTTTCCATTTATCCGCATCCCTTTATTTTTTTTTATTTCAAATCCACAATCATATTTTTTTGTTATGGAA
CAATTCCAGTTGTTACAACTATATGATTGATCCAGTCATATAGTGACTGTTTTTGGGATCTCGACAATATGA
AGCAATAAGTTAGTTATTAGTTTTTAATTTTTTTTATATAGTAGTTGTAGTTATTGAATTAATATTAGGGAT
CAGTCTTTTTTTGATCCTACTAAAAACTATAAAGAAAAAACTAACGAGTCACACACTAAGCATAGCAATTAT
AAAAAAAAAAAGGTTAATTTCTTTTTTATTCAACCTTATAGAATTCGAATTATTTTATTTTTTTTATTTAAC
AGAAAAATAGAAAAAGTTTCTAGTTTTTTGTTCTATATATCACTATATTACTGGATAGAATGACAAGATAAA
TAAAGGTCTATTATTCTTCATCCACAAATATCCAAATTTTGAGGCCTAGTACTCCATGGATAGTTCGAATTG
TATAGGAACAATGATCAATTTTAGCGCGAATTGTTTGTAGAGGAACCCTACCTTCTCTGATCCATTCGACAC
GTGCAATTTCTTTTCCATCAATACGTCCTGCAATTTGTATTTGAATTCCTTTTGTATCTGTTTGTTCAGTTA
ATTCAATAGCTCTTTTCATTGCCTTTCGAAATGAAACTCTATTTCTTAATTGAGAAGCCATATATTCTGCAA
GAATATTGGGGTCTCCATAAGGTTTTTCTATTCGTGTGATAGCAATGTTGATTCTTCGGTTCACAGAACGAA
ATTCTTTTTGTACATTCATCTGTAATTCTTCGATTCCTCGTGTTCGGCCCTCTATTAATAAATTTGGGAATC
CAATATGAATTATAACCTGGATTAAATCAATTCTTTTTTGAATTTCTATACGCGCAATTCCAATTCCTTCGA
AACCTGAGGATATTTTTTTATTTTTTTGTACATAGTTCTTTATACAATTCCGTATTTTCTCATCTTCTTGTA
GACCTACAGAAAAATTTTTTGGTTGTGCGAACCAAAAGGAATGATGATTTTGGGTTGTACCAAGTCTGAAAC
CAAGCGGATTTATTTTTTGTCCCATATTTTTTATTATATTATCTTTCCATCTATTTTTTTCTAAATATGAAT
CTAAATCTTAAATTCATCGAAAGATAATTTTGATTTATCTTTTAATACAATTGTTATATGACAAGTTGGCCT
TTTTATCGGATAACTACGTCCTCGAGCTCTAGGTCTTAATTTTTTCACAAAAGAACCTCCATTGACTTCGGC
CTTACTAATGAATAAATCGGTTTCGTTCAAACCCATATTATGACTAGCGTTTGCTGCTGCGGAATAAACCAA
TTTTAAAATGGGATAAGATGCTCGATAAGGCATAAGTTCCAATATCATAAGCGTTTCCTCATAAGAACGCCC
GCGAATCTGATCAATTACTCTTTGCGCTTTGAAAACAGACATACATATATGTTGAGCAAAAACTTTTACTTC
TCCACTCGAATTTGAGTTCTTTTTCTTTATCATAAGGTTATCTCCCGCCAATGAATGATAAGTATCTATTTT
TTTTTCCAAATTAACGACGAGATTTATTATCGTTTCTCGCATGTCTCGCGAAAGTCAGAGTCGGCGCGAATT
CTCCCAATTTGTGACCTACCATACGATCTGTTATATAAATAGGTAAATGTTCCTTTCCATTATGAATAGCGA
TTGTATGGCCAATCATTTTGGGTATAATGGTAGATGCCCGAGACCAAGTTACTATTATTTCTTTCTCCTCCC
TCATGTTGAGTTTTTCAATTTTTCTTGATAAATGATTAGCTACAAAAGGGTTTTTTTTTAGTGAACGTGCCA
CAGCTGATTACTCCTTTTTTTACATTTTAAAGATTGGCATTCTATGTCCAATAGAATATCTCGATCTAAGTA
TGAAGGTAAGAATAAATACAATAATGATGAATGGAAAAAAGAGAAAATCCTTTAGCTAGATAAGGGGCGGAT
GTAGCCAAGTGGATCAAGGCAGTGGATTGTGAATCCACCACGCGCGGGTTCAATTCCCGTCGTTCGCCCATC
ACATTATTTCAAATTCAAAAAATTCTATTTTCAATATTCCTATTTACGGCGACGAAGAATAAAACTATCACT
ATATTTTTTCCTTTTCCGACTTCTTCTTCCAAGCGCAGGATAACCCCAAGGAGTTGTGGGTTTTTTTCTACC
AATTGGGGCTTTCCCTTCCCCACCTCCATGGGGATGGTCTACAGGGTTCATAACTACTCCTCTTACTACAGG
ACGCTTACCTATCCAACACTTCGATCCGGCTCTACCCAAACTTTGTTGATTCACCCCAACATTACCCACTTG
TCCGACTGTTGCTAAGCAGTTTTTGGATATCAAACGGACCTCCCCGGATGGTAATCTTAATGTGGCTGATTT
ACCCTCTTTTGCGATCAGTTTCGCTACAGCGCCCGCCGCTCTAGCTAATTGTCCACCCTTTCCAAGCGTGAT
TTCTATGTTATGTATGGCCGTGCCTAAGGGCATATCGGTTGAAGTAGATTCTTCTTTTAAAAACCCCTTCCC
AAACTGTACAAGCTTCTTCCAAAGCATACGGCTTTCTAGATGTATATGATGATATCTAGACAGATGGATCTT
TATCTTATATGAATCGTATGATGAAGTACCACATGAGTGGATATATAGGAATCCAAATCTGCCGAATCACTC
ATGTATGATCTTCTACATCCTAGGTCTCCCCGTTCCATCATCTGGCTTATGTTCTTCATGTAGCATTCAGAC
CGAATGACTCTATGAAATTACGTCGATACTTCCACATATTACGGGTAACGTAGGAGACATCTCTATTTTTCC
CCGGGGGGATCTTTATAATTACCACTGCTTAGCTTTCAATTCGCCTCTGACCATCAAATTAAATGTGAATAA
CCCGTCCTCCTCTCTTTGAAACAAGGGGCGCTTCCGGTTCTGTGCGTGCTTCAAACAATTTTGTCTTCTCCA
TATTACCATATCTCTAGAGTCAATAATTTTCTATGAGGAACTACTGAACTCAATCACTTGCTGCCGTTACTC
AACAGTTTTCTGTTGAGGTCTATCCCATAGAGGTACTCAAATTGGATCAGTGATTGATTTCTAGGTTTCATC
GTAAACCTAATTGGTTACTTCCAATTACGTAAATCAATAGTTCAAACCGCACTCAAAGGTAGGGCATTTCCC
ATTGATATAGGGACTTCTGTACCAGAAATAATGGTATCTCCAATTATAGCCCCTCTGGGGTGTAAAATATAT
CTTTTCTCGCCATCCCCATAATGTATGAGACAAATGTATGCATTTCGATTAGGGTCATATTCTATGGTTACG
ATTCTACCAGATATGTCTTTTTCATTCCGTCGAAAATCGATTTTACGGTATAGACGCTTATGACCTCCCCCT
CTATGTCTTGCGGTAATGATTCCTCTGGCATTACGACCTTTACCACAATGATGCTGTCCACAGATCAAATTA
TTTCGTGGATTGGATTTCATTTGACTGTCTATGGCTCTATTACGTGTGCTCGGGGTAGAAGTTTTGTATAAA
TGTATCGCCGTGTTATTAAGTATTTTGCTTTAAGTTCTTTTCTCTATAAGAGGTGGAATAGAATAACCCGGT
TGAAGCGTAATGATCATACGTCTGTAATGCATTGTATGTCCCATAATAGGTCCTATTCTTCTACCCTTTCCT
GGGAGTCGATGACTATTCATAGCTATTACCTTGACACCAAAGAAGAGTTCGACCCAATGCTTTATTTCTGTC
CTAGTTGATCCTGATTCGACATTAGAAGTATATTGATTGTTCCCCAATAACCGAATACTTTTTTCTGTAAAT
ACTGCATATTTGATTCCATCCATAACTCCATTTTCTTCCCTATGAGTTCCAGTATCGATAAGAATTCTAGTT
CTTACTGTTCATATGTTATGGTATGAATATACCATACCAATTCGTTATGTATGGATGATGAGATTCCATTGA
TACAGAGCCAATTCCAATAGACTTATTGAACGTTCCCATTGGCGTGCATCCAGCAGGAATTGAACCTACGAA
TTTGCCAATTATGAGTTGGGCGCTTTAACCATTCAGCCATGGATGCTTAACAGGGCTCATTGTACATCGTGA
ATAACCAAATTCCAATTGAAATGAAATCTTTAGGAGGAATCAATGAAAATCTTTAGGAGGAATCAATGAAAC
GATATCAATTCAAATCCTGGATCTTCGAATTGAGAGAGATATTGAGTGAGATCAAGAATTCTCACTATTTCT
TAGATTCATGGATCAAATTCGATTCAGTGGGATCTTTCACTCACATTTTTTTCCACCAAGAACGTTTTATGA
AACTCTCTGACCCCCGAATTTGGAGTATCCTACTTTCACGTGATTCACAGGGTTCAACAAGCAATCGATATT
TCACGATCAAAGGTGTAGTACTGCTTGTAGTAGTGGTCCTTATATCTCGTATTACCAATCGAAAGATGGTCG
AAAGAAAAAATCTCTATTTGATGGAGCTTCTTCCTATACCTATGAATTCCATTGGACCCAGAAATGAGACAT
TGGAAGAATCTTTTTGGTCTTCCAATATCAATAGATTGATTGTTTCACTCCTGTATCTTCCAAAAGAGAAAA
AGATTTCTGAGAGTTGTTTCATGGATCCGCAAGAGAGTACTTGGGTTCTCCCAATAAATAAAAAGTGTATCA
TGCCTGAATCGAACCGGGGTTCGCAGTGGTGGAGGAACCGGATCGGAAAAAAGAGGGATTCTAGTTGTAAGA
TAGCTAATGAAACCGTAGCTGGAATTGAGATCTCATTCAAAGAGAAAGATAGCAAATATCTGGAGTTTCTTT
TTTTATCCTATACGGATGATCCGATCCGCAAGGACCATGATTGGGAATTGTTTGATCGTCTTTCTCCGAGGA
AGAAGCGAAACATAATCAACTTGAATTCGGGACAGCTATTCGAAATCTTAGGGAAAGACTTGATTTGTTATC
TCATGTCTGCTTTTCGTGAAAAAAGACCAATTGAAGGGGAGGGTTTCTTCAAACAACAAGGAGCTGAGGCAA
CTATTCAATCAAATGATATTGAGCACGTTTCCCATCTCTTCTCGAGAAACAAGTGGGGTATTTCTTTGCAAA
ATTGTGCTCAATTTCATATGTGGCAATTCCGCCAAGATCTCTTCGTTAGTTGGGGGAAGAATCAGCACGAAT
CGGATTTTTTGAGGAACGTATCGAGAGAGAATTGGATTTGGTTAGACAATGTGTGGTTGGTAAACAAGGATT
GGTTTTTTAGCAGGGTACGGAATGTATTGTCAAATATTCAATATGATTCCACAAGATCTATTTTCGTTCAAG
TAACGGATTCTAGCCAATCGAAAGGATCCTCTGATCAATCCAGAGATCATTTCGATTCCATTAGAAATGAGG
ATTCAGAATATCACACATTGATCGATCAAACAGAGATTCAGCAACTAAAAGAAAGATCGATTCTTTGGGATC
CTTCCTTTCTTCAAACGGAACGAACAGAGATAGAATCAGATCGATTCCCGAAATGCCTTTTTGGATCTTCCT
CAATGTCCCGGCTATTCACGAAACGTGAGAAGCAGATGAATAATCATCTGCTTCCGAAAGAAATCGAAGAAT
TTCTTGGGAATCCTACAAGATCAATTCGTTCTTTTTTCTCTGACAGATGGTCAGAACTTCATCTGGGTTCGA
ATCCTACTGAGAGGTCCACTAGAGATCAGAAATTTTTGAAGAAAAAACAAGATGTTTCTTTTGTCCCTTCCA
GGCGATCGGAAAATAAAGAAATGGTTGATATATTCAAGATAATTACATATTTACAAAATACCGTCTCAATTC
ATCCTATTTCATCAGATCCGGGATGTGATATGGTTCCGAAGGATGAACCAGATATGGACAGTTCCAATAAGA
TTTCATTCTTGAAAAAAAATCCATTTTTGGATTTATTTCATCTATTCCATAACCGGAACAAAGGGGGATACA
CGTTACACCACGATTTTGAATCAGAAGAGAGATTTCAAGAAATGGCAGATCTATTCACTCTATCAATAACCG
AGCCGGATCTGGTGTATCATAGGGGATTTGCCTTTTCTATTGATTCCTACGGGTTGGATCAAAAAAAATTCT
TGAATGAGGTATTCAACTCCAGAGATGAATCGAAAAAGAAATCTTTATTGGTTCTACCTCCTCTTTTTTATG
AGGAGAATGAATCTTTTTATCGAAGGATCAGAAAAAAATTGGTCCGGATCCACTGCGGGAATGATTTGGAAG
ATCCAAAACTAAAAACAGTGGTATTTGCTAGCAACAACATCATGGAGGCAGTCAATCAATATAGATTGATCC
GAAATCTGATTCAAATCCAATATAGCATCTATGGGTACATAAGAAATGTATCGAATCGATTCTTTTTAATGA
ATAGATCCAATCGCAACTTCGAATATGGAATTCAAAGGGATCAAATAGGAAATGATACTCTGAATCATATAA
CTATAATGAAATATACGATCAACCAACATTTATTGAATTTGAAAGAGACTCAGAAGAAATGGTTTGATCCTC
TTATTTCTCGAACCGAGAGATCCATGAATCGGGATCCTGATGCATATAGATACAAATGGTCCAATGGGAGCA
AGAATTTACAGGAACATTTGGAACATTTCGTTTCTGAACAGAAGAACCGTTTTCAAGTAGTGTTCGATCGAT
TACGTATGAGTCAATATTCGATTGATTGGTCCGAGGCTATCGACAAACAAGATTTGTCTAAGTCACTTCGTT
TCTTTTTGTCCAAGTCACTTCTCTTTTTGTCCAAGTCACTTCCCTTTTTGTCCAAATCACTTCCCTTTTTCT
TTGTGAGTATGGGGAATACCCCCATTCATAGGTCCGAGATCCACATCTATGAATTGAAAAGTCCGAATGATC
AACCCTGCAATCAGTTGTTAGAATCAATAGGTGTTCAAATCGTTCATTTGAATAAATTGAAACCCTTCTTAT
TGGATGATCGTGATACTTCCCAAAGACCGAAATTCTTGATCAATGGAGGAACAATATTACCATTTTTGTTCA
AAAAGATACCAAAGTGGATGATTGACTCATTCCATACTAGAAATAATTGCGGAAAATTCTTTGATAACACGG
ATTCCTATTTCTCAATGATATCCCACGATCGAGACAATTGGCTGAATCCCGTGAAACCATTTCATAGAAGTT
CATTGATATCTTCTTTTTATAAAGCAAATCGACTTCGATTCTTGAATGATCCACATCACTTCTGGTTCTATT
GTAACAAAAGATTCCCTTTTTCTGTGGAAAAGACCCGTATCCATAATGATGATCTTACATATGGACAATTCC
TCAATATCTTGTTCATTCGCAACAAAATATTTTCTTTGTGCGTCGGTAAAAAAAAACATATTTTTTTGGAGA
GAGAGACTATTTCACCAATCGAGTCACAGGTATCTGATATATTCATACCTAACGATTTTCTACAAAGTGGTG
ATGAAACGTATAACTTGTACAAATCTTTCCATTTTCCAATTCGATCCGATCCGGTCGTTCGTAGAGCTATTT
ACTCGATCGCCGACATTTCTGCAACATTTCTAAGAGAGGAACGAATAGTCAATTTTGAAAGAACTTATTGTC
GGCCTCTTTCAGATATGAATCTATCTGATTCAGAAGGGAAGAACTTGCATCAGTATCTTAGTTTCAATTCAA
ACATGGGTTTGATTCACACTCCATGTTCTGAGAAATATTTACCATCCGGAAAGAGGAAAAAACGGAGTCTTT
GTCTAAAGAAATACGTTGAGAAAGGGCAGATGTATGGAACCTTTCAACGAGATAGTGCTTTTTCAAATCTCT
CAAAATGGAATCTGTTCCAAACATATATGCCATGGTTCCTTACTTCGACAGGGTGCAAATATCTAAATTTCG
CCCTTGTAGATACTTTTTCAGACCCATTGCCAATACTAAGTAGCAGTCAAGAATTTGTATCCATTTTTCATG
ATATTATGTATGGATCAGATATATCATGGCCAATTCCTCAGAGGATTCTTCCACAATGGACTCTGATAAGTG
AGATTTCGAATAAGTGTTTACAGAATCTTCTTCTGTCCGAAGAAATGATTCATCGAAATAATGAGTCACCCG
TTCCATTGATATGGGCACATCTGAGATCAAGAAATGCTTGGGAGTTCCTCTATTCAATCCTTTTCCTTCTTC
TTGTTGCTGGATATCTCGTTCGTATCCATCTTCTCTTTTTTTCCCGAGCCTCTAGTGAGTTACAGACAGAGT
TAGAAAAGATAAAATCTTTGATGATTCCATCATACATGATTGAGTTGCGAAAACTTCTGGATAGGTATCCTA
CATCTGAACTGAATTCTTTTTGGTTAAAGAATCTCTTTCTAGTTGCTCTGGAACAATTAGGAGATTCTCTGG
AAGAGATACGGGGTTCTGCTTTTGGTGGCAACATGCTATTGGGTGGTGGTCCCACTTATGGGGTCAAATCAA
TATGTTCTAAGAAGAAATATTTGAATATAAATCTCATCGATCTCATAAGTATCATACCAAATTCCATCAATC
GAATCACTTTTTCGAGAAATACGAGACATCTAAGTCGTACAAGTAAAGAGATCTATTCATTGATAAGAAAAA
GAAAAAATGTGAACGGTGATTGGATTGATGATAAAATGGAATCCTGGGTCGCGAACAGTGATTCGATTGATG
ATGAAGAAAGAGAATTCTTGGTTCAGTTCTCCACCTTAATGACAGAAAAAAGGATTGATCAAATTCTATTGA
GTCTGACTCATAGTGATCCTTTATCAAAGAATGACTCGGGTTATCAAATGATTGAACAACCGGGATCAATTT
ACTTACGATACTTAGTTGACATTCAGAAAAAGTATCTAATGAATTATGAGTTCAATAGATTCTGTTTAGCAG
AAAGACGGATATTCCTTGCTCATTATCAGACAATCACTTATTCACAAACCTCGTGTGGGGCTAATAGTTTTC
ATTTCCCATCTCATGGAAAACCCTTTTCGCTCCGCTTAGCCCTATCCCCTTCTAGGGGTATTTTAGTGATAG
GTTCTATAGGAACTGGACGATCCTGTTTGGTCAAAAACCTAGCGGCAAACTCCTATGTTCCTTTCATTACGG
TATTTCCGAACAAGTTCCTGGATGACAAGCCTAAAGAGTATCTTATTGATGATATTGATGATAGTGACGATA
TCCATATTGATGATAGTGACGATATTGATGATGACCTTGATACGGAGCTGCTAACTATGACGAATGTGCTAA
CTATGTATATGACGCCGAAAATAGACCGATTTGATATCACCCTTCAATTCGAATTAGCAAAAGCAATGTCTC
CTTGCATAATATGGATTCCAAACATTCATGATCTGTATGTGAATGAGTCGAATTACTTATCCCTCGGTCTAT
TAGAGAACTATCTCTCCAGGGATTGTGAAAGATGTTCCACTAGAAATATTCTTGTTATTGCTTCGACTCATA
TTCCCCAAAAAGTGGATCCCGCTCTAATAGCTCCGAATAAATTAAATACATGCATTAAGATACGAAGGCTTC
TTATTCCACAACAACGAAAGCACTTTTGCATTCTTTCATATACTAGGGGATTTCACTTGGAAAAGAAAATGT
TCCATACTAACGGATTCGGGTCCATAACCATGGGTTCTAATGCACGAGATCTTGTAGCACTTATCAATGAGG
CCCTATCAATTAGTATTACACAGAAGAAATCAATTATAGAAACTAATACAATTAGATCCGCTCTTCATAGAC
AAACTTGGGATTTGCGATCCCAGGTAAGATCGGTTCAGGATCATGGGGTCTTTTTCTATCAGATAGGAAGGG
CTGTTGCACAAAATGTACTTCTAAGTAATTGCCCCATAGATCCTATATCTATCTATATGAAGAAGAAATCGT
GTAAGGAAGGAGATTCCTATTTGTACAAATGGTACTTCAAACTTGGAACGAGCATGAAGAAATTAACGATAC
TTCTTTATCTTTTGAGTTGTTCTGCCGGATTGGTCGCTCAAGATCTTTGGTCTTCACCCGGACCCGGATCCG
GTGAAAAAAATAGGATCACTTCTTATGGATTCGTTGAGAATGCTTCTGATCTAGTTCGTGGCCTATTAGAAG
TAGAAGGCGCTCTGGCGGGATCCTCACGGACAGAAAAGGATTGGAGTCAGTTTGATAATAATCGAGTGACAT
TACTTCTTCGGTCCGAACCAAGGAATCCGTTAGATATGATGCAAAATGGATCTTTTTCTATCGTTGATCAGA
GATTTTTCTATGAAAAATACGAATCGGAGTTTGAAGAAGGGGAAGGGGCCCTCGACCCGCAACAGATAGAGG
AGGATTTATTCAATCACATAGTTTGGGCTCCTAGAATATGGCGCCCTTGTGGCAATCTATTTGATTGTATCG
AAAGGTCCACTCAATTGGGATTTCCCTATTGGGCCGGGTCATTTCGGGGCAAGCGGATCATTTATCATAAAA
AGGATGAGCTTCAAGAGAATGATTCGGAGTTCTTGCAGAGTGGAACCATGCAGTACCAGACACGAGATAGAT
CGTCCAAAGAACAAGGCTTTTTTCGAATAAGCCAATTCATTTGGGACCCTGCAGATCCATTCTTTTTCCTAT
TCAAAGATCAGCCCTTTGTCTCTGTGTTTTCGCGTCGAGAATTCTTTGCAGATGAAGAGATGTCAAAGGGGC
TTATTACTTCCCAAACAAATTCTTCTACATCTATATCTAGACACTGGTTCATCAAGAATACGCAAGAAAAGC
ACTTCGAATTGTTGATTCATCGCCAGAGATGGCTTAGAACCAATAGTTCATTATCTAATGGATCTTTCCGTT
CTAATACTCCATCCGAGAGTTATCAGTATTTATCAAATCTCTTCCTATCTAACGGAACGCTATTGGATCAAA
TGGCAAAGACATTGTGGAGAAAGAGATGGCTTTTCCCGGATGAAATGAAATATTTGATTCATGTAACAGGGG
AAAGATTTCCCATTCCTTAGCCGTAAAGATATGTGGCCATGAAAAGGGGATTAAGTGGAACAGAATTGGCCG
GATGGTAGAGTCGTGGAAACACTTGTTTATTCCATATTTTGGACCTTAGCTCCATGGAGCAATATGCTACTG
CTGAAGCATGGAAGAATTGAAATCTTAGATCAAAACACTATGTATGGATGATATGAACTGCCTAAACAAGAA
TTCTTGAACGGTGAACAACCAGAGCCTATTACTCACTACATCAAAGAATTTCCATTAATGAAACCATGGAAA
TCCGTCGGAAAAGAAAAAATACGCATGTCCGATGAAACGATTGTTGCTATCTGCTCCAATAACGAATCATTG
GTTTAACTGAATAACTAAAGAAAATAGATAGACCTTTCTCTTCGTCTCAGGTCGATGGATCTTCTCAATTGG
AAGATCTCCCATATGGATAATACATATTCTGGTTGACCGAGCCTAATTCTAATTGTTTTGTTCCGAAGCAAA
GATATCCATGGAGGTGGTTCGTCCTATTCACGACCAAGAGGTACTGGATTCTCTTTCGGATAGGCCCTGAAA
AGAGAAGGAAAGCTGGAATGCCAACAGGCGTCTGTCTATTCTCTAATTCACCCGACCCGATAGTACCCATTT
TGGGAACGTCCAGTGCCAAAGTCACTGAATGGGTAAGTCGCCAATCCCTAAAATGTACTATGTAATGTACTT
TATCCGCTGGGTTACGGGTACTGGTGGGTATTTTACTAGAGGTTTCTATCAATCTACCCCTGTGTGATTCCT
GTTGAATCATATACTCGGGGGGTGGCGCGGGGCGGACGATTTCCAAACGGACTCCTCATTCATTAGATAGAG
AAGATCACCAAGATTTCGTGATCTGCTGCCGAACCTGTTCCAATTCCAACAGCTCGGACTCGGATCGTGGGG
ATCGCCGGAATACTTCGTATCAACAGATAAGATACTCGGTATATCAATATTGATTAGATCCGAAATCCGTTA
TTGAATTGCTCATTCAATGAGCATTCTCAATATTATGCCTTGAAGAGGACTCGAACCTCCACGCTATTTAGC
ACGAGATTTTGAGTCTCGCGTGTCTACCATTTCACCATCAAGGCATCTTGAAAGTGAATCGTATTCCATGAA
TATGATATCTATCTAGTGTGATATATGGAATATATGGACAAAGGTGGATGGAGTGTTGGGGTATTTCTATCG
ATCGGTCATGTCATATAGGCCCGAGTCAGACATCAAATTGCTTCGATTTGAATTATCCGTAGGATACCCTAT
ATATCAAAAAGATGTACAATCAAACCTATTTCTCGATTCAATAGAAGCCCAAAGAAGTGAATATGGTACCCA
AATAACGATAGATATGTCAAAAGCAGGTCCGATTACGCCTATTCCTAATCCTAAATAGAATGTAACGATGTA
GGGATCCATATGGAAACATAGTATCTATTTACATACGCTCGAATGACCCCTTCTCATAATAAGAATGTACAT
AACCCTATTCCGGTCTGGTCCGGTATGGAATGAACTTATAATCTGATGATCGAGTCGATTCCATGATTATAA
GTTCATAACCCCAGCCCATTTTGGGCGGAACAGATCTACTAATTCTTTTATTCCAGTTAGTAAGAGGGATCT
TGAACTAAGAAATAGGCCTAGAAGCTAAAAGAGGGTATCCTGAGCAATTGCAAGAATTGGGTTCATTGATAT
TCCTGGTATAGTAGATGCTATCACACATACAGTCATACTCCATTCGATGGAATTGTTTGATCTTAAGGGAGA
TCTTCTATAATTTCGCACGTGAGGGGTTATTTCTTGGTTTCGTCCAGTCATTAATAACTTGATTATTTTTAG
ATAATAGTAGATGGAAACAACGCTCGTAAGGAGTCCTATTGAAACCAAGAAATATAGGCCTGCCTGCCATCC
ACACCAGAATAGATGGAGTTTTCCGAAAAACCCTGCTAGTGGAGGAAGACCCCCTAGGGATAAGAGACATAG
GGCTGAAGAGAGAGCCAAAAAAGGATCTTTCGTGTATAATCCTGCATAATCTCGAATGTTATCAGTTCCGGT
ACGTAGACCAAATGATACAATGCGAGCAAAAGTTCCTAGATTCATGGAGATATAGAACAGCATATAAGTTAT
CATGCTTGCATATCCATCATTTGAGTCTCCAACAATTATTCCAATAATTACATATCCGATTTGACCGATGGA
CGAATATGCAAGCATACGTTTCATGCTTGTTTGAGTAATAGCAATGAGATTCCCCAATATCATGCTAAGAAT
AGCTAGGATTTCCAAAAGAAGATGCCATTCGTTTGATGAGAAATAAAAAGGAATATCGAAAATTCGCGTGGC
TGAAGCTAAAGCAGCTACTTTCGAAGTAACAGAAAGAAAAGCAACGACTGGAGTGGGAGAGTCAGAGTCGAA
AAGAGGATTCCTCACTTCTTTCTCTCATTCAAAACCGTGCATGAGACTTTCATCTCGCACGGCTCCTAAGTG
ATAAAAGAAAGAAGAACTCATCTTCTTTCTTTTTTGATTACCTTCCTCGCGTATGTATAAGACCGAATCCAT
TCGATTTCTAAAAAGGATTACTAATCCTTAACTTTTCGAGGAATCCTTCATCAGTGGTTGTTAATGACTGAC
TTTTTCAATCTTTCGACCTTGGTTCCGTAGGAGCACAAGTCAGAAAGATTGAGAAATAGAACCATCTGATTT
GATTCGTTCTCAATAGCCATGAGATGATCATCTTAGGGTGATCCTTTTGTCAACGGATGCCCTTATTACACT
CGTAGTCTCTGAAGGATGAGAACCAACTATGTAGCATCTACATCGATAATTCAAGTATTGTATACGTCATTA
GTCCGATCCTTTGTAGGAACTACCCGTAATAACGAACTTGCAAAATGGATCTGTTTATCATAAAGAGATTCG
TTGTTCCTGACCCTGCTTCACCTTAATTGTTATTTGAACAAAAAGATCATAAAAAACTTTTGGTAAAAGTTA
TGTCTTGGTCCGAGTGGGGATAGCATTTCTCTTCTGCATGTCTATGGAGTTTTTAAAAATCCAAACATCTCA
GAGATAGATATAGAGGTAGGAATTTGTTGAGCGAACCGCACTCCTTCGTATACGTCAGGAGTCCATTGATGA
AAAGGGGCTGGGGAAAGCTTGAACCCAATTCCTACAGTGATGGATATAAGTGCAATTGAAATTCCTGGGGAG
TTATACATTTGTGTATTGATAAGACCATTCACTATTTCTTGAAGCTCGATCTCCCCCCCAGATGAACCATAT
AGCCAAGAGAAACCATGAACCAGAATAGAAGAGCTTGCCCCGCCCATGAGTAAATATTTCGTAGTAGCCTCA
TTAGACCGTACATCTCTCTTGGTATATCCAGATAATAGGTAGGAACATAAACTGAAACATTCTGGAGCTACA
AAGATAGTTATTAAATCGTTAGCACCACATAAAAACATTCCTCCTAGAGTAGCTGTTAATACGAATAACAGA
AACTCTGTTATAGCCATTTCTGTACATTCAATGTACTCTACGGATAGAGGAATACATAGAGTTGAACATAGT
AAAATAAGAAATTGAAAGATTTCGTTGAAATTGTTCGTTTGGAAATTTCCCGAAAAGCTAATTATAGGTTCT
TCTTTCCATCGGAACAATAGGGCCGTTATGCTCATTACTAAACTTGTTGAAGAGATGAAATAGAACCAAGGT
CTATCTTTTTGATCAGAGGTTGAATCGATCATCAGAAGAAGAATTAGGCCAAAAATTAGGATACATTCTGGG
AAAATGAAACTTCCATTGAAGAGAAGCAAATGAAACGCTTTCATAAAAATTCTCGTAGAATCGAGAATGAAG
TTTTCATTCTGTACATGCCAGATCATAAATTAGTAACTGCATCCAATCTCCGAAAAAGTCCCAATTGTTTCA
AACTTTTTGGATATTTTATTTACGGAATCCCTATGAATAGGATCAAACCTTATTCCATGATATTTCCATAAG
ATTCCTCTTTCTTATTCTTAAGCAAGCCCTCGAGAGGGTTTAGTTGATCCATGATTTATGTTTCATCTTTCT
TTTTGTTTGTTTCGAGAAAGATATCGATCAATTCCGATTCTTTCTTTTTCGATTGATTCTTTTCCGATCGAG
ATGTATGGATCCATGGATCTATGTGTCTATATGGATCCTGTTCATGGATTAACGAAAATGTGCAAAAGCTCT
ATTTGCCTCTGCCATTCTATGAGTCTCTTCCTTTTTGCGTATGGCATCGCCACTCCCTTTGGCAGCATCTAC
TAATTCGGAACTTAATTTGAAAGCCATATTTCGACCCGGGCGTTTTCGGGATGCCCCTAATAACCAACGAAT
GGCGAGTGCTTTTCCTTGTGTAGATCCTATTTCAATAGGAACTTGATGAGTCGACCCGCCTACACGTCTTGC
TTTTACTGCTATATCGGGAGTTACTCCACGTATTGCTTGACGTAAAACGGATAGTGGATTTGTTTCCGTCTT
TTGTTGAATCTTTTTCACGGCTTGATAGATAATTTGATAAGCCAATGATTTTTTTCCGTGTTTCAGAATACG
GTTAACCAACATGTTAACTAATCGATTACGATAAATTGGATCGGATTTTGCAGTTTTTTCTTCTGCAGTACC
TCGACGTGACATGAGCGTGAAAGAGGTTCAAAAATAAGTTTTTTTTTATAAGGGCTAAAAATGAATCACTTA
TTTTGGCTTTTTGACCCCATATTGTAGGGTGGATCTTGAAAGATATGAAAGATCTCCCTCCAAGCCGTACAT
ACGACTTTCATCGAATACGGCTTTCCACAGAATTCTATATGTATCTATGAGATCGAGTATGGAATTCTGTTT
ACTCACTTTAAATTGAGTATCCGTTTCCCTCCTTTTCCTGCTAGGATTGGAAATCCTGTATTTTACATATCC
ATACGATTGAGTCCTTGGGTTTCCGAAATAGTGTAATGTAAAAAGAAGTGCTTCGAATCATTGCTATTTGAC
TCGGACCTGTTCTGAAAAAGTCGAGGTATTTCGAATTGTTTGTTGACACGGGCAAAGTAAGGGAAAATATCT
GAAATGATTTCAATATTGGACCTTGGACATATAATAGTTCCGAATTGAATCTCTTTTAGAAAGAAGATCTTT
TGTCTCATGGTAGCCTGCTCGAGTCCCCTTACGAAACTTTCGTTATTGGGTTAGCCATACACTTCGCATGTT
TCTAGCGATTCACATGGTATCATCAAATGATACAAGTCTTGGATAAGAATCTACAACGCACTAGAACGCCCT
TGTTGACGATCCTTTACTCCGACAGCATCTAGGGTTCCTCGAACAATGTGATATCTTACACCGGGTAAATCC
TTAACCCTTCCTCCTCTTACTAATACTACAGAATGTTCTTGTAAATTGTGGCCAATACCAGGTATATAAGCA
GTGATTTCAAATCCAGAGGTTAATCGTACTCTGGCAACTTTACGTAAGGCAGAGTTTGGTTTTTTGGGTGTG
ATAGTGGAAAAGTTGACAGACAAGTCACTCTACAGAACCGTACATGAGATTTTCCCCTCATACGGCTCCTCG
TTCAATTCTTTCGAAGTAATTGGATCCTTTTCTTCGTTCGAGAATCTCTTCCCTTCTTCCACTCTGCCCCGA
AGAGTAACTAAGACCAATTCATTCACGTTTTCATGTTCCAATTGAACACTTTCCATTTAGGATCAAAGAAGA
AGATTATTCTTTTTACCAAACATATGCGGATCAAATCACGATCTTCTATTCTAATCTAATAAGAACAAGAGA
TCTTTCTCGATCAATCCCTTTGCCCCCCATTCTTCGAGAATCAGAAAGATCCTTTTCGAGTTTGAATTTGTT
CATTTGGAATCTGGGCTCTTCTATTTTCTACTTATTTTTTTTTATTCTTTATTTCATTTCGATTTTCTTTCC
CTCTCTTTTCTTTTTATTTCCTTCCATCATTCCTTAAGTCCCATAAGGTTTGGTGATCCTGTAAAATCTGAC
CCATTTTCTCATCGAGCGAGGGGTACGAAATAAATCAGATTGATTTTTCGATCAAAAAAAAGTACTATGTGA
AATCTTCGGTTTCTTCCTCTTCCTCTATCCCATAGGTACAGCGTTTGGTTTGAATCAATAGAGAACCTTTTC
TTCTGTATGAATCGATATTATTACATTCCAATTCCTTCCCGATACCTCCCAAGGAAAATCTCGAATTGGATC
CAAAATTGACGGGTTAGTGTGAGCTTATCCATGCGGTTATGCACTTTTCAAATAGGAATCCATTTTCTGAAA
GATCCTGGCTTTCGTGCTTTGGTGAGTCGTCCGAGATCCTTTCGATGACCTATGTTGTGTTGAAGGGATATC
TATATGATCCCATCGATTGCGTAAGGCCCGCGATAGCAACGGAATCGGGGAAAGTATACAGAAAAGATAGTT
CTTTTCTATTATATTAGTATTAGTTAGTGATCTCGGCTCGGTGGGTCCCTTCCTCCGTGATGAACTGTTGGC
ACTAGTCCTACATTTTGTCTCTGTGGACCGAGGAGAAAGGTGGCTCAGCGGGAAGAGGGTTGTACCATGAGC
GAAGCAAGGGGTCAACTGCTTCAAATATATAACATGGATTCTGGCAATGCAATGGAGTTGGACCCTCATGTC
GATCCGAATGAATCAGTCTTTCCACAGAGGTCAATCTTTGCCTGCTAGGCAAGAGGGCAGCAAGTTACAAAT
TCTGTCTCGGTAGGACATGTATTTTCTATTACTATGAAATTCATAAATGAAAATGAAGTAGTTAGTGGTGGG
GTTACCATTATTCTTTTTCTTGTATGTGTTCCTAAGAAAAGGAATTTGTCCATAATAGTGCGAAAAGAAGGC
CCGGCTCCAAGTTGTTCAGGAATAGTGGCGTTGAGTTTCTCGACCGTTTGCCTTAGGATTAGTTAGTTCTAT
TTCTCGATGGGGCCGGGAAGGGATATAACTCAGCGGTAGAGTGTCACCTTGACGTGGTGGAAGTCATCAGTT
CGAGCCTGATTATCCCTAAACCCAATAGGAGTTTTTCTATTTTGACTTGCTCCCCGCAGCGATCGAACGAGA
ATGGATAAGAGGCTTGTGGGATTGACGTGATAGGGTAGGGATGGCTATATTGCTGGGAGCGAACTCCAGGCT
AATATGAAGCGCACGGATCCAAGTTATGCTTGGAATGAAAGAAATTCCGAATCAGCTTTGTCTACGAACAAG
GAAGCTATAAGTAATGCAACTATGAATCTCATGGAGAGTTCGATCCTGGCTCAGGATGAACGCTAGCGGCAT
GCTTAACACATGCAAGTCGGACGGGAAGTGGTGTTTCCAGTGGCGGACGGGTGAGTAACGCGTAAGAACCTG
CCCTTGGGAGGGGAACAACAACTGGAAACGGTTGCTAATACCCCGTAGGCTGAGGAGCAAAAGGAGGAATCC
GCCCGAGGAGGGGCTCGCGTCGGATTAGCTAGTTGGTGAGGTAATGGCTCACCAAGGCGACGATCCGTAACT
GGTCTGAGAGGATGATCAGTCACACTGGAACTGAGACACGGTCCAGACTCCTACGGGAGGCAGCAGTGGGGA
ATATTGGACAATGGGCGAAAGCCTGATGCAGCCATGCCGCGTGGAGGTAGAAGGCCCACGGGTCGTGAACTT
CTGTTCCCGGAGAAGAAGCAATGACGGTATCTGGGGAATAAGCATCGGCTAACTCTGTGCCAGCAGCCGCGG
TAAGACAGAGGATGCAAGCGTTATCCGGAATGATTGGGCGTAAAGCGTCTGTAGGTGGCTTTTTAAGTCCGC
CGTCAAATCCCAGGGCTCAACCCTGGACAGGCGGTGGAAACTACCAAGCTGGAGTACGGTAGGGGCAGAGGG
AATTTCCGGTGGAGCGGTGAAATGCGTAGAGATCGGAAAGAACACCAACGGCGAAAGCACTCTGCTGGGCCG
ACACTGACACTGAGAGACGAAAGCTAGGGGAGCGAATGGGATTAGATACCCTGGTAGTCCACGCCGTAAACG
ATGTCAACTAGCCGTTGGGCGCCTTGAGCCGTGTAGTGCCGCAGCTAACGCATTAAGTTGACCGCCTGGGGA
GTACGGCCGCAAGGTTAAAACTCAAATGAATTGACGGGGGCCCGCACAAGCGGTGGAGCATGTGGTTTAATT
CGAAGCAACGCGAAGAACCTTACCAGGCCTTGACATGCCACGAACTTTCTAGAGATAGATTGGTGCCTTCGG
GAACACGGAGACAGGTGCTGCATGGCTGTCGTCAGCTCGTGTCGTGAGATGTTGGGTTAAGTCCCGCAACGA
GCGCAACCCTTGTCCTTAGTTGCCAGCACGTAATGGTGGGAACTCTAAGGAGACTGCCGGTGACAAACCGGA
GGAAGGTGGGGATGACGTCAAGTCATCATGGCCCTTACGGCCTGGGCTACACACGTGCTACAATGGTCGGTA
CAAAGGGTTGCCAAGCCGCGAGGTGGAGCTAATCCCATAAAACCGATCGTAGTCCGGATCGCAGTCTGCAAC
TCGACTGCGTGAAGTCGGAATCGCTAGTAATCGTGAATCAGAATGTCACGGTGAATACGTTCCCGGGCCTTG
TACACACCGCCCGTCACACCATGGGAGTGGCCTTGCCCGAAGTAGTTAGCTTAACCTCAAGGAGGGGGATGC
CGAAGGCGGGGCTAGTGACTGGAGTGAAGTCGTAACAAGGTAGCCGTACTGGAAGGTGCGGCTGGATCACCT
CCTTTTCAGGGAGAGCTAATGCTTATGCTTGTTGGGTATTTTGGTTTGACACTGCTTCACACCCAAAAAGAA
GCGAGCTACGTCTGAGCTAAGCTTGGATATTGAAGTCTTCTTTCGTTTCTCGACGGTGAAGTAAGACCAAGC
TCATGAGCTTATTATCCTAGGTCGGAACAAGTTGGTAGGATCCCACTTTTTACGTCCCCATGCCGCCACACG
AGAGGGACATGGGGCGCAAAAGGGAAAGAGAGGGATGGGGTTTCTCTCGCTTTTGGCATAGCAGGCCTCCCA
CTGGGAGGCCCGCACGAAGGGCTATTAGCTCAGTGGTAGAGCGCGCCCCTGATAATTGCGTCGTTGTGCCTG
GGCTGTGAGGGCTCTCAGCCACATGGATAGTTCAATGTGCTCATCAGCGCCTGACCCGGAGATGTGGATCAT
CCAAGGCACATTAGCATGGCGTACTCCTCCTGTTCGAATCGGAGTTTGAAACCAAACTTCTCCTCAGGAGGA
TAGATGGGGCGATTCAGGTGAGATCCAATGTAGATCTAACTTTCTATTCACTCGTGGGATCCGGGCGGTCCG
GGGGGGACCACCGTGGCTCCTCTCTTCTCGAGAATCCATACATCCCTTATCAGTGTATGGACAGCTATCTCT
CGAGCACAGGTTTAGGTTCGGCCTCAATGGGAAAATGGAGCACCTAACAACGCATCTTCACAGACCAAGAAC
TACGAGATCGCCCCTTTCATTCTGGGGTGACGGAGGGATCGTACCATTCGAGCCTTTTTTTCATGCTTTTAC
CGGAGGTCTGGAGAAAGCAGCAATCAATAGGATTTCCCTAATCCTCCCTTCCCGAAAGGAAGAACGTGAAAT
TCTTTTTCCTTTCCGCAGGGACCAGGAGATTGGATCTAGCCATAAGAAGAATGCTTGGTATAAATAACTCAC
TTCTTGGTCTTCGACCCCCTCAGTCACTACGAGCCCGATCAGTGCAATGGGATGTGTCTATTTATCTATCTC
TTGACTCGAGAGCAGGTTTGAAAAAGGATCTTAGAGTGTCTAGGGTTGGGCCAGGAGGTCTCTTAACGCCTT
CTTTTTTCTTCCCATCGGAGTTATTTCACAAAGACTTGCCATGGTAAGGGAGAAGGGGGAACAAGCACACTT
GAAGAGCGCAGTACAACGGAGAGTTGTATGCTGCGTTCGGGAAGGATGAATCGCTCCCGAAAAAGAATCTAT
TGATTCTCTCCCAATTGGTTGGATCATAGGTGCGATGATTTACTTCACGGGCGAGGTCTCTGGTTCAAGTCC
AGGATGGCCCAGCTGCGCCAGGGAAAAGAATAGAAGAAGCATCTGACTCTTTCATGCATACTCCACTTGGCT
CGGGGGGATATAGCTCAGTTGGTAGAGCTCCGCTCTTGCAATTGGGTCGTTGCGATTACGGGTTGGATGTCT
AATTGTCCAGGCGGTAATGATAGTATCTTGTACCTGAACCGGTGGCTCACTTTTTCTAAGTAATGGGGAAGA
GGACCGAAACATGCCACTGAAAGACTCTACTGAGACAAAAAGATGGGCTGTCAAGAACGTAGAGGAGGTAGG
ATGGGAAGTTGGTCAGATCTAGTATGGATCGTACATGGACGATTGTTGGAGTCGGCGGCTCTCCTAGGGTTC
CATCATCTGGGATCCCTGGGGAAGAGGATCAAGTTGGCCCTTGCGAATAGCTTGATGCACTATCTCCCTTCA
ACCCTTTGCTTTGAGCGAAATGTGGCAAAAGGAAGGAAAATCCATGGACCAACCCCATCGTCTCCACCCCGT
AGGAACTACGAGATCGCCCCAAGGACGCCTTCGGCATCCAGGGGTCACGGACCGACCATAGACCCTGTTCAA
TAAGTGGAACGCATTAGCTGTCCGCTCTCCGGTTGGGCAGTAAGGGTCGGAGAAGGGCAATCACTCGTTCTT
AAAATAAAACCAGCATTCTTAAGACCAAAGAGTCGGGCGGAAAAAGGGAGAGAGCTCTCTGTTCCTGGTTCT
CCTGTAGCTGGATTCTCCGGAACCACAAGAATCCTTAGAATGAATGGGATTCCAACTCAGCACCTTTTGAGA
TTTTGAGAAGAGTTGCTCTTTGGAGAGCACAGTACGATGAAAGTTGTAAGCTGTGTTCGGGGGGGAGTTATT
GTCTATCGTTGGCCTCTATGGTAGAATCAGCCGGGGAGGCCTGAGAGGCGGTGGTTTACCCTGTGGCGGATG
TCAGCGGTTCGAGTCCGCTTATCTCCAGCCCGTGCACTTAGCTGATACTATGACAACACCCAATTTTTTCAA
TTCGGCAGTTCGATCTATGATTTTTCATTCATGGACGTTGATAAGATCCTTCCATTTAGCAGCACCTTAGGA
TGGCATAGCCTTAACATTAATGGCGAGGTTCAAACGAGGAAAGGCTTACGGTGGATACCTAGGCACCCAGAG
ACGAGGAAGGGCGTAGCAAGCGACGAAATGCTTCGGGGAGTTGAAAATAAGCATAGATCCGGAGATTCCCGA
ATAGGTCAACCTTTCGAACTGCTGCTGAATCCATGGGCAGGCAAGAGACAACCTGGCGAACTGAAACATCTT
AGTAGCCAGAGGAAAAGAAAGCAAAAGCGATTCCCGTAGTAGCGGCGAGCGAAATGGGAGCAGCCTAAACCG
TGAAAACGGGGTTGTGGGAGAGCAATACAAGCGTCGTGCTGCTAGGCGAAGCAGTGGAGTGCTGCACCCTAG
ATGGCGAGAGTCCAGTAGCCGAAAGCATCACTAGCTTACGCTCTGACCCGAGTAGCATGGGGCACGTGGAAT
CCCGTGTGAATCAGCAAGGACCACCTTGCAAGGCTAAATACTCCTGAGTGACCGATAGTGAACTAGTACCGT
GAGGGAAAGGCGAAAAGAACCCCGGAGAGGGGAGTGAAATAGAACCTGAAACCGTGTGCGTACAAGCAGTGG
GAGGAGACTGTGTTCTGTGACTGCGTACCTTTTGTATAATGGGCCGGCGACTCATAGTCAGTGGCTAGGTTA
AGGGAACCCACCGGAGGCGTAGCGAAAGCGAGTCTTAATAGGGCGATAGTCGCTGGGTATAGACCCGAAACC
GGGTGATCTATCCATGACCAGGTTGAAGGTTGGGTAACACTAACTGGAGGACCGAACCGACTAATGTTGAAG
AATTAGCGGATGAGTTGTGGTTAGGGGTGAAAGGCCAATCAAACCCGGAGCTAGCTGGTTCTCCCCGAAAnn
nnnnnnnnnnnnnnnnnnnnnnnnnnnnnnnnnnnnnnnnnnnnnnnnnnnnnnnnnnnnnnnnnnnnnnnn
nnnnnnnnnnnnnnnnnnnnnnnnnnnnnnnnnnnnnnnnnnnnnnnnnnnnnnnnnnnnnnnnnnnnnnnn
nnnnnnnGGGAAACAGCCCAGATCACCAGCTAAGGCCCCTAAATGACCGCTAAGTGGTAAAGGATGTGGGGA
TGCAGAGACAGCCAGGAGGTTGGCTTAGAAGCAGCCACCCTTTAAAGAAAGCGTAATAGCTCACTGGTCGAG
TCGGCCTGCGCGGAAGATGTAACGGGGCTAAACCATCCACCGAAGCTGTGGGATGTCAAAATGCATCGGTAG
GGGAGCGTTCCGCCTTAGAGGGAAGCACCCGCGCAAGCAGGTGTGGACGAAGCGGAAGCGAGAATGTCGGCT
TGAGTAACGCAAACATTGGTGAGAATCCAATGCCCCGAAAACCTAAGGGTTCCTCCGCAAGGTTCGTCCACG
GAGGGTGAGTCAGGGCCTAAGATCAGGCCGAAAGGCGTAGTCGATGGACAACAGGTGAATATTCCTGTACTA
CCCCTTGTTGGTCCCGAGGGACGGAGGAGGCTAGGTTAGCCGAAAGATGGTTATCGGTTCAAGGACGCAAGG
TGACTTTGCTTTTGCAGGGTAAGAAGGGGTAGAGAAAATGCCTCGAGCCAATGTCCGAGTACCAGGCGCTAC
GTCGCTGAAGTAACCCATGCCATACTCCCAGGAAAAGCTCGAACGACCTTCAACAAAAGGGAACCGTACCCC
AAACCGACACAGGTGGTTAGGTAGAGAATACCAAGGCGCTTGAGAGAACTCGGGTGAAGGAACTAGGCAAAA
TGGCCCCGTAACTTCGGGAGAAGGGGTGCCTCCTCACAAAGGGGGTCGCAGTGACCAGGCCCGGGCGACTGT
TTACCAAAAACACAGGTCTCCGCAAAGTCGTAAGACCATGTATGGGGGCTGACGCCTGCCCAGTGCCGGAAG
GTCAAGGAAGTTGGTGACCTGATGACAGGGGAGCCGGCGATCGAAGCCCCGGTAAACGGCGGCCGTAACTAT
AACGGTCCTAAGGTAGCGAAATTCCTTGTCGGGTAAGTTCCGACCTGCACGAATGGCGTAACGATCTGGGCA
CTGTCTCCACCCGAGACTCAGTGAAATTGAAATCGCTGTGAAGATGCGGACTACCTGCACCTGGACAGAAAG
ACCCTATGAAGCTTCACTGTTCCCTGGGATTGGCTTTGGGCCTTTCCTGCGCAGCTTAGGTGGAAGGCGAAG
AAGGCCTCCTTCCGGGGGGGCCCGAGCCATCAGTGAGATACCACTCTGGAAGAGCTAGAATTCTAACCTTGT
GTCAGGACCTACGGGCCAAGGGACAGTCTCAGGTAGACAGTTTCTATGGGGCGTAGGCCTCCCAAAAGGTAA
CGGAGGCGTGCAAAGGTTTCCTCGGGCCGGTCGGAGATCGGCCCTCGAGTGCAAAGGCATAAGCGAGCTTGA
CTGCGAGACAGACACGTCGAGCAGGTACGAAAGTAGGTCTTAGTGATCCGGTGGTTCTGTATGGAAGGGCCA
TCGCTCAACGGATAAAAGGTACTCCGGGGATAACAGGCTGATACCGCCCAAGAGTTCATATCGACGGCGGTG
TTTGGCACCTCGATGTCGGCTCATCACATCCTGGGGCTGAAGCCGGTCCCAAGGGTATGGCTGTTCGCCATT
TAAAGTGGTACGCGAGCTGGGTTTAGAACGTCGTGAGACAGTTCGGTCCCTATCTGCCGTGGGCGTTTGAGA
TTTGAGAGGGGCTGCCCCTAGTACGAGAGGACCGGAGTGGACGCACCTCTGGTGTTCCGGTTGTCATGCCCA
CGGTCATCGCTGGGTAGCCAAGTGCGGAGCGGATAACTGCTGAAAGCATCTAAGTAGTAAGCCCACCCCAAG
ATGAGTGCTCTCCTATTCCGACTTCCCCAGAGCCTCCGGTAGCACAGCCGAGACAGCGATGGGTTCTCTGCC
CCTGCGGGGATGGAGCGACAGAAGTATTGAGAATCCAAGATAAGGTCACGGCGAGACGAGCCGTTTATCATT
ACGATAGGTGTCAAGTGGAAGTGCAGTGATGTATGCAGCTGAGGCATCCTAACAGACCGAGAGATTTGAACC
TTGTTCCTACACGACCTGATCAATTCAATCAGGCACTCGCCATCTATTTTCATTGTTCAACTGTTTGACAAC
ATGAAAAAACCAAAAGCTCTGCCCTTCCCTCCCTTGGATAGATAGGGAAGGGCGGAGGCCTTTGGTGTTCCT
TCCAGTCAAGAATTGGGGCCTCACAATCACTAGCCAATATTTCTCTCATTCTCATGCCTTTCTTTGTTCATG
ATTCGATATTCTGGTGTCCTAGGCGTAGAGGAACCACACCAATCCATCCCGAACTTGGTGGTTAAACTCTAC
TGCGGTGACGATACTGTAGGGGAGGTCCTGCGGAAAAATAGCTCGACGCCAGAATGATAAAAAGCTTAACAC
CTCTTATTTTACTAAAAAAAATGCAAAGGTCCTCTTATTCAAAACCTCAATTATGATATCTCTTCTCTCCCC
CTTCACACCTCAGAACGCACTGTTCTTATAGAGAGAAACGCACTTTCACATCTTCTTAACCCGAAACGAAAT
GGCTGAGGAGAGGTTCCTTTTTGAGGGTACTCCCGGGAACAGATCCAGTAGAGACGGGGTGGGGCCTGTAGC
TCAGAGGATTAGAGCACGTGGCTACGAACCACGGTGTCGGGGGTTCGAATCCCTCCTCGCCCACAACCGGCC
CAAAAGGGAAGGACCTTTCCCTCTGGGGGGTAAGAAAATCATGATCGGGATAGCGGACGCAAAGCTATTGAA
CTTGGGTATGGTCTTTTGTCGAAATGGAATGGCCTTACTTTTTATTTATTTTATCGTGAAGGCTTTATAATT
ACATATAGTAACCATACTTGAATTAGCATATTTGTGTTTTACTCCCCGTAACTCTTCCTCAGCCAGGCTTGG
GCAGAATAGCAGAGCAAGTACAAGTATTAGTAGCATAGCAAAAATGCGTTCCTCGTCATTAATATGTTTGCT
CGCGTTAATTGTGGTCTATCGGGAGAATCGATGACTGCATCTTTGATGCACTGCTAGTACATCATCTGAGAA
TTCTTAATTGGCTAGTTATAAATAGACACAGGGCTATTTACAAGGGATTACCTCGGATCTACGCCGAGGTAT
TGACGGTGATTCTCAAATATCGTAAAACAGAATGTGATACGATGAGATAGAATGCAATAGAAACAAAGACAG
GGAACGGGTTACCTACCCCTAATGGTCAAAGCGAGCCCTTTCATTCAATTCTGCATTCTTTAATGAAATTAA
GAATCAATCAAATCTCCCCAAGTAGGATTCGAACCTACGACCAATCGGTTAACAGCCGACCGCTCTACCACT
GAGCTACTGAGGAACAACGGGAGATTCGACCTCATAGAGTTCAACTCCCGTTCTCAACCCATGAGTCCGAAG
CTTCCTTCGTAACTCCCGGAACTTCTTCGTAGTGGCTCCGTTCCATGCCTCATTTCATAGGGAACCTCAAAG
TGGCTCTATTTCATTATATTCCATCTATATCCCAATTCCATTCATTTAATATTTCTTTGGTGTGATTGACAT
AAGAGATGTCATTCAATCGAAGAAGATGGTATCGTTGACATAAGAGATGTCATTTCTAGTCTATCTCTTTCT
ATATATGGAAAGTTAAGAAATCATCATATAATAATCGAGAAATTGAAATAGAAAAGAAAAAAGGGAGGTTTG
TGATGATTTTAAAATCTTTTCTACTAGGTAATCTATTATCCTTATGCATGAAGATAATAAATTCGGTCGTTG
TGGTCGGACTCTATTATGGATTTCTGACCACATTTTCCATAGGGCCCTCTTATCTCTTCCTTCTCCGAGCTC
GGGTTATGGAAGAAGGAACTGAGAAGGAGATATCAGCAACAACGGGTTTTATTACGGGGCAGCTCATGATGT
TCATATCGATCTATTATGCGCCTCTGCATCTAGCATTGGGTAGACCTCATACAATAACTGTCCTAGTTCTAC
CGTATCTTTTGTTTCATTTCTTCTGGAACAATCACAAAAACTTTTTTGATTATGGATCTACTACCAGAAATT
CCATGCGTAATCTCAGCATTCAATGTGTATTCCTGAATAATCTCATTTTTCAATTATTCAACCATTTCATTT
TACCAAGTTCAACGTTAGCCAGATTAGTCAACATTTATATGTTTCGATGCAACAACAAGATGTTATTTGTAA
CAAGTAGTTTTGTTGGTTGGTTAATTGGTCACATTTTATTCATGAAATGGGTTGGATTGGTATTATTCTGGA
TACGGCAAAATCATTTGATTCGATCTAATAAGTACCTTGTGTCAGAATTGAGAAATTCTATGGCTAGAATCT
TTAGTATTCTCTTATTTATCACCTGTGTCTACTATTTAGGCAGAATGCCATCGCCTATTGGTACTAAGAAAC
TGAAAGAAACCTCAGAAACGGAAGAAAGCGATGTAGAAACAACTTACGAAACGAAGAAGACGAAACAGGAAC
AAGAGGGATCCACTAAAGAAGACAAAGATAGCCCGGTTTACGAAGATTCTTATCTTGATATCCATCAAGATA
ATTGGGAATTAGGAAAACTTAAAGAAGAGAAAACTTATTTTTGGTTTGAAAAACCTATTGTAACTTTTCTTT
TCGATTATAAACNNNNNNNNNNNNNNNNNNNNNNNNNNNNNNNNNNNNNNNNNNNNNNNNNNNNNNNNNNNN
NNNNNNNNNNNNNNNNNNNNNNNNNNNNNNNNNNNNNNNNTAAAAAAATGAATACAAAAGAAAAATACAAGA
ATAGATAAGAAGAAATTCGCCCACCTCCCATATATTTAATCCCTTCACCTATAAAGAAACTAATAACACCAA
TCCCATTTATCATTCCATCAATTATATGTCTATCAAAAAACTGAACTAGTTTAGCTAATTCTCTTACATTTC
CAGTAAAAATCTTAGTATAAAAAATATCTATATAACCACGATTATATGACCAGTTATATATCAAATTTTTTA
TTAGGTCGAATAAAATTATCGTGCGGCTCTTCTTCACAAATGAATTGACTAAACTCAAATTCTGTAGAGATG
AATAAACAGATCCATATAAAATGGATGCTATAAATAATCCAAAAAAGGCTATACTTACTGAAAAAACTGAAT
TTTTTAAAAAATCATAAAAATCTGAAGGCTCATTTTGATGGAAAAATTTTGTAGATGGGGTTAACCACTTTG
ACAATAGATCAGGATCTAGTCCACCAAAATCAATTCCGATTGATCCAATCAACAAAGTAAATAATACCAATA
TAAGCATGGGAAATAACATAGTATTGTCCGACTCGTGAGGATAGGTGTAAGTATATTTATTTCTAAAATAAG
TACTAAAGTATCGTACTCTATTTTGAAAAAAATTTTCAATTTGATATGTATTTTTTGAAAAAAAAGAAACCT
TAGTATTCATTGTTGAAAACAGTAATTTTTTTTTTCTTGCTTGGGGTACTTTTTTTCCCCATAAAGATATTG
AATAGAAAGAACTATTTTTAGCGCTACTGTAATTTTGAAAATGAATACGCAAATGTCCATCAAAGGTAAGTA
AATACATTCGAAACATATAAAATGCAGTGAATCCTGCTGTAAATGAAGCGATTATTGCGAAAATTGGTGAAT
ACAACCAACTATCATTAAGAATTTCGTCTTTCGACCAAAAACAAGCAAGAGGTGGAATACCACAAAGAGAAA
GTGTACCTAATAAAAAAGTAATTCTTGTAATTGGAATATATTTTGTTAACCCTCCCATAAGAACCATATTTT
GACTTTTATCTGGTGAAAATCCAACAATGGATTCCATTGAATGAATAATGGATCCAGATCCTAAAAACAATA
AAGCTTTCGAATAGGCATGAGTGATCAAATGGAATAAAGCGGCCCTATAAGAACCTATACCCAGAGCTAATA
TAATATAACCCAATTGAGACATGGTAGAATAAGCTAAACTTCTTTTAATATCTCTTTGAGCAAGAGCCAAAG
TAGCTCCTAATAATACTGTTATTACACCTATTAAGGAAATAAGATTCATTATGTAAGGTATGACTATGAAAA
GAGGAAGAAGACGAGCTACAAGAAAAATTCCTGCTGCTACCATAGTAGCAGCATGTATAAGAGCCGAAATGG
GAGTGGGTCCTTCCATAGCATCAGGTAACCATATGTGAAGGGGAAATTGTGCAGATTTAGCAACTGCGCCGA
GGAATAAAAAAGAAGCACAAAGAGTAATAAATAAAGAATTTACTCCATTATTATGAATTAATTTAGTAACTA
TTTCGAACAAATCTCGAAATTCTAAACTACCCGTTATCCAATAAAATCCTAAAATTCCCAATAATAAACCAA
AATCCCCTATACGATTGGTTACAAAAGCTTTTTGACAAGCACTTGCTGCAATTGGTCGTGTGAACCAAAAAC
CTATTAATAAATAGGAACACATTCCTACAAGTTCCCAAAAAATATAAATTTGTATTAAATTAGAACTAGTAA
CTAATCCCAACATAGAAGTATTGAAAAAACTCATATAAGCAAAAAATCTCAAATATCCTCGATCATGAGACA
TATAATTATCACTATAAATAAGAACCATGATTCCAACAGTAGTAATTAATATTGGCATAATAGAAGTAAGCG
GATCAATCAAGTGTCCGAACTCTAAAGAAAAATCATTATTGACAGTCCAAGACCATAGATATTGATAGATAA
AATTTCCGTTTATTTGCTGAATAGAAAGATTAATAGAAAATACCATAGCTATAGTTAGCATCAAAACACTCG
GGAAAGCCCACATACGTCGAATATTTTTTGTTGCTGCAGGAATAAGTAGAAGCCCAAATCCTATTAACATAG
TAATAGGAAATGGAAGAAAAGGTATTATCCATGCATATTTATATGTATGTTCCATAAAAAACACAAATTTTC
GTTTTTTTCTTATAATTGTTTCCGATTCGCCAATTTTTATTGCTTTTGAAGAAAACAATAAAAAAATGAAAA
AAAAAAGATATGAAACCTTTAAAATTCTTATTTTACATTTTTCTTACTTTTTTCAGATATTTCAAAAATTTG
AAAAAGTTATAAATTGTTGCTTAAATGCTTTGCCCAAATAGCTCGATATAGAGTCATTTTTTAGTTATTAAT
TTTTTAACAAAAATATTCATTTTTGAAGTGGAAATAAAAAAAAAAAGAGAAGGAGAATATGATATTAAAAAA
AATTTTGCCACTAGACTAGAATTGTATTCTAGTAATATATAACCATATCATATACTATAGTAAGCAAAGAAA
AAGTAAGAAAAGTAAGCAAAAATAACTATACCAATATCAGTAGAATATGGATATGGATATATAGTTTGCATC
AATAAATCAACTAATTCTTCTAGTAATTTTTTTTTAATTACCTAATTTCTATTTTTTATGAAATTAATTGAT
TGGATTTCAATCCAATAAGATAAGAAAATATCAGAAATCTTATAAAAATCCTTACTTCTTATATTCTAGAAC
GGAATAAAAAAAAAACGTAAAATGAAAGTTCCTTTTCTTAGCTAACGGAATGTCTTGTTTAACATATTAACT
ACTAGAAAATTCCTTTAAAAATTTGTCTTTCTTTTCTTCTATTTTTTCCTAGTTTATTATATATGTAACACA
CATGTATATATAAACAATATATTTGTATTGTTAAAAAAAAAAGATTATCGACGAAATTAAATATAATATAAA
AAATGACTAAAACTAAAAAAAAAAACGATCCATATTGATCAATACATGTCTTTCACATACAACAATAAAAAG
GAAGAACTCTTTTTTTTATGGCAGTTCCAAAAAAACGTACTTCTATATCAAAAAAACGTATTCGTAGAAATA
TTTGGAAGAAAAAGGGAAATTTAGTTGCAATAAAAGCCTTTTCTTTAGCAAAGTCAGTTTCTACGGGAAATT
CAAAAAGTTTTTTTGTTCGGCAAACAAATAAGAAAATCTTGGAATAAAATAATTTGAATTCCGTGATTTAAA
GAACTTTTCCATATATAGAATATGCAAATTTTTCATTAACTTATGTATTTATTTACCTCCTCAAGATTAGTT
AGAACTAGCAGACAGATAAGTTAATATTCGACATAAAATNNNNNNNNNNNNNNNNNNNNNNNNNNNNNNNNN
NNNNNNNNNNNNNNNNNNNNNNNNNNNNNNNNNNNNNNNNNNNNNNNNNNNNNNNNNNNNNNNNNNNNNNNN
NNNNNNNNNNNNNNNNNNNNNNNNNNNNNNNNNNNNNNNNNNNNNNNNNNNNNNNNNNNNNNNNNNNNNNNN
NNNNNNNNNNNNNNNNNNNNNNNNNNNNNNNNNNNNNNNNNNNNNNNNNNNNNNNNNNNNNNNNNNNNNNNN
NNNNNNNNNNNNNNNNNNNNNNNNNNNNNNNNNNNNNNNNNNNNNNNNNNNNNNNNNNNNNNNNNNGATATG
TATAAAATAATCCTATTTATTTAATTTATATTTATTTATTTTTTTATAAAAAAGATCTTTCTAAGTTTTCTA
AGTGTTATTAAAAATGAAAAGAATACTTTAGTTTAAACAAAAGAGTTTAAAAGAACCCTTATTCATCCATTT
CCTAAAGGATAACTATATCAGATTCTAGAATCTACATCTAGACGATTCAACATGAATTGACTATTATTATTT
CAAGTAAGCCGCTATGGTGAAATTGGTAGACACGCTGCTCTTAGGAAGCAGTGCTAGAGCATCTCGGTTCGA
GTCCGAGTGGCGGCATACTCTAAAAGAGATAGAATGGATCTTATAATGTATTTAATTCCCGATTTCAATTCT
GTAATGAGACCCTTTTTATGTATGATATTTGCGACTTTAGAACATATATTAACTCATCTCTCTTTTTCGATC
GTTTCCATTGTGATTGCGATTCATTTGATGATTCTATCAGTTCACGAAATCATCGGATTACGCCATTCGTCG
GAAAAAGGAATGTTAGCTACTTTTTTTTCTCTAACAGGATTATTAGTTATTCGTTGGATTTCTTCGAGACAT
TTTCCATTAAGTAATTTATACGAGTCATTGATCTTCCTTTCGTGGAGTTTTTCCATTATTCATATGGTTTCC
AAGCTATGGAATCATAAAAATGATTTAAGCACAATAACCGCGCCAAGTGCCATTTTTACTCAAGGTTTCGCT
ACATCTGGTCTTTCAAGTAAAATGCATCAATCAGCAATATTAGTACCTGCTCTACAATCTCAGTGGTTAATG
ATGCATGTAAGTATGATGTTATTAAGCTATGCAGCTCTTTTATGTGGTTCGTTATTATCAGTCGCTTTTTTA
GTCATTACATTTCGAAAAAACATCGATATTTTTTTTAGAAGCAAAAATGTATTAATATTAATTAAGTCATTT
TTCTTTGGGAAGATCCAATACTTGAACGAAAAAAGAAGTGTTGTTAAAAGCACTTCTTTTCTTTCATTTCCA
AATTATTATAAATATCAATTAATTCGGCGTTTGGATTATTGGAGTTATCGTGTTATTAGTTTAGGATTTACC
TTTTTAACCATAGGTATTCTTTCTGGAGCAGTATGGGCTAACGAAGCATGGGGGTCTTATTGGAATTGGGAC
CCCAAGGAAACTTGGGCATTTATTACTTGGACCATATTCGCGATTTATTCACATACTAGAACAAATCAAAGT
TTGCACGGTGCGAATTCGGCACTTGTAGCTTCTATAGGATTTCTTATAATTTGGATATGCTATTTTGGGATC
AATCTATTAGGAATAGGTCTACATAGTTATGGTTCATTCACATAAAATCTAATTCAATTGTAGAAATTCCAT
GCGGAATAAGTAAGACATATATAACGAAAATTTGTGTGAGTTTTTAAGAACTGTTTGAATTAAGATTCAAAC
AGTTCTTAAAAACTTGGGATACATCTTTCTAATTCACTTTATTATTTTTTTTTTTCGTTGTACAGCGAATAG
TTTCAAAAATATTATAATTGAAAATGATAAGACTTTCTATCTCATTAAGAAAAAAAAAGAACTATCTATGAA
AATAATTAGATAAGATAGCTTGTATCTTGTCAACTGATAAAGAAAGAACGAAATCGGGATAAATACCAATTC
CTATTACGGGTAAAAGGATACAGATTGAAACAAATAGTTCTCGTGGTCCAGAATCCACGAAATTTGAGTTTA
GAACATTGAAAAAATTGTATCCATAGAACATTTGCCGTAACATAGATAACAAATAAATAGGAGTTAATATCA
TTCCAATTGCCATTACAAGGGTAATTAATATTTTTGGCATTAAAAGATATTTTGGACTGGTAATTAGTCCAA
AAAATACTACTAATTCCGCAACAAAACCACTCATTCCCGGCAATGCAAGAGAAGCCATCGAGAAACTACTAA
ACATGGTAAATATTTTTGGCATTGGAATGGATATTCCCCCCATTTCGTCGAGATAAACAAGACGTATTCTAT
CACAACTCATTCCTACCAAGAAAAAAAGTGCAGCACCAATAAATCCATGAGAGAGTATTTGTAAAATGGCTC
CGTTGAGTCCCATGTCGGTTATAGAACTAATTCCTATAATTGTGAAACCCATGTGCGATACAGAAGAATAGG
CTATTCTTTTTTTTTGATTGCGTTGACCAAGCGAGGTTGAAGCTGCATAAATTATTTGGATTGCCCCCACTA
TCACTAACCAGGGAGAAAATATAGAGTGAGCATGTGGTAATAATTCCATATTGATACGAATCAATCCATATG
CTCCCATTTTTAATAAGATTCCCGCTAGAAGCATACATGTACTGTAATGTGCTTCTCCATGGGTATCTGGTA
ACCATGTATGTAGGGGTATAATCGGTGATTTGACAGCATAAGCAATAAGGAAGCCCAAATAGAATATTATTT
CTAATGTCACAGGATATGACTGATTAGCTAATCTGTCAAAATCCAATGTCGGTTCATTGGAACCATATAAAC
CCATACTTAGAACTCCTATTAAGAGAAAAATGGAACCCCCCGCAGTGTACAAAATAAACTTTGTAGCCGAGT
ACAAACGTTTCTTTCCTCCCCACATAGATAAAAGTAAGTAAACAGGAATTAATTCTAACTCCCACATGATAA
AAAAAAGTAAAAGATCTCTAGAAGAAAATAATCCTATTTGACCACTGTACATTGCTAACATCAGGAAATAGA
AAAATCGCGAATTTCGAGTAACAGGCCAAGCTGCTAAAGTAGCTAAAGTAGTGATAAATCCTGTTAGTAAAA
TAGGTCCTATGGAAAGTCCGTCGATTCCCAGTCTCCAGTGAAAATTGAAAACATTTATCCATTTAGCATCCT
CTTCTAATTGAATTAATGGATCGTCCAATTGGAAATGATAACGGAAGACATAGGTTGTTATAAGGAGTTCTA
ATAAACAAATACATATAGTATACCACCTAAATACCTTATTCCCCTTATGAGGGAGAAAGAAAATTGAGGAAC
CCGCGAATATTGGCAAAACTACAAGTATTGTTAACCAAGGGAAATAACTCGTGATAAAGACAAGATGCGTTT
TGACCAAAAAGCCCGTGCTCAAGAAAATATATTCTTTTGAGCACGGGCTTTTGTCGGTAAAAAGGAATCAAA
TGATTCAAGTGGAATTTATTATAACGTATCAATAAGATAGACCCATGCTGCGAGTTGTTTCATGCCATAAAT
AAACACGGACACTCAAAAAATCTGTTGGACAGGCAGATTCACATCTTTTACAACCTACACAGTCTTCTGTTC
TTGGCGCGGAAGCAATTTGCTTAGCTTTACATCCGTCCCAAGGTATCATTTCCAATACATCTGTGGGGCAGG
CTCGTACACATTGAGTGCACCCTATACATGTATCATAAATTTTTACTGAATGTGACATTGGGTCTATAAATT
CCAGTTTTGAACATAAAAAATTTTCGATCTGGTAAAGTAAAAAAAAAATNNNNNNNNNNNNNNNNNNNNNNN
NNNNNNNNNNNNNNNNNNNNNNNNNNNNNNNNNNNNNNNNNNNNNNNNNNNNNNNNNNNNNNNNNNNNNNNN
NNNNNNNNNNNNNNNNNNNNNNNNNNNNNNNNNNNNNNNGACCAAGAGACTTTGATTTATCTTTCAACAACC
ATGATCATATGAGTCACATGAATCACACGTGCAACTTCACGTTGACTAATGGATCGTCAATATTTCAATATA
AATATATATTGAAATATTACTATACATATTAGTATTATTTGTAAATTTGTAAATAAATATGTAAAAGACACT
GAAATGATATTTTTTTTTCAACAATTTCTATATATATATATATTCTATTTTTATTTATTTATATTATAGTTA
TGGCTAATTTTTCAACAAACTTGATTGATTAATACGAGTTGATTTTCTGTTACGATAGATCGACGAAACAAT
AGCTAGCCCAATAGCAGCTTCCGCCGCTGCAATCGCTATAATAAAGATTGAGAAAATCTCGCCTTTTAATTG
GCGACTATCAAATATATCAGAAAATAGTACGAGATTAATATTAACCGAATTTAGTATAAGTTCAAGACACAT
AAGTGCTCTAACCATGTTTCGACTTGTGATCAATCCATAGATACCGATTGCAAATAAATAGACACTCAAAAA
AAGTACATGTTCGAACATCATTGACTAACTCCTGATCAACCTCGATTCGTTTCAATATGAACAAAAATTCAA
CCAAGTTGATTGACTAGAATCCAGCGATTACATAAAAAAGGGAATATTGACAGTAGATTAAACTAAAAATTT
TTTTAATTCTAACTAAACTATTTATTTTTATTATTGACGAGCCATAGTAATTGCGCCTATCAAAGAAACTAA
AAGAATTATAGAAATTAGTTCAAACGGAAGATAAAAATCTGTTGATAAATGAATTCCAATTTGTTGAACGTT
GTTTATAAAGTCTTGCTCTATAATCTGATTTGATCTTGTAGTCCAAATAATTCCGTACCATGACGTATCTGC
GATAGTAGTAATTAGTGAAAAAAGAATACTTATACAAACCAGTGAAGTGACTCCATCTCCAATAGTCCAAAG
ATAGGAGTCGTTAGAATATTCTGAACCATTCACGAACATAACAGCAAATATGATTAAGACATTTATGGCTCC
CACATAAATAAGAAGCTGGGCGGCAGCTACAAAAAAGGAGTTTGATGAAATATAGAATAAGGATATACAAAC
AAGAACCGATCCCAACGAAAAGGCGGAATAAATTGGATTAGTAAACAATACTACTCCTAGACCTCCTAATAT
AAGAAATGATCCCAGAAATACTACAAGTATATCATGTATTGGTCCAGGTAAATCCATTATGTATAAGAGAAA
AATAAGTCAAAATGTTTCATGACCTTACTAAATAGTCCAGGAAAGAGAGGGGTGTTCCCCTTATTTTTTTCT
TATATATGATGAGTTTTTAATGCAATTAAATCTTAATATGGATGGATTACTGTGGATATGGATAAAGTTATT
AAAATTATCCGCCAATCTTTTCTTTTTTCTTTTAGAGATTAGAATTTTTTAATATTTTAAAATAATTAAGAA
AACACATATTCACCGTTTAAATTAAAGAATGATTCTCAATAATCAATAGTTAATAAGATAAGTTTATTAGGT
TCTCATAAAAAAAAAAGAAGACTTGTTTCTGTTTATCTTTATATAAAAAAATATTAGTAATCAGTAATCGTT
CTTGAATCAAGGGGTTTATCTTTATCCATTTTGATTTGACTGGAATTCATAATTGTTTGAATTGTGTAATCT
CCAATTACTGACATTGGTAACCGACCTAATGCAATTTGATTATAATTTAATTCGTGACGATCATAAGTTGAA
AGTTCATATTCTTCAGTCATCGATAAACAGTTTGTTGGACAATACTCGACACAATTACCACAAAATATACAG
ACTCCAAAATCAATACTATAATTAAACAATTGTTTCTTTTTAATCTCTCTTTTAAACCTCCAATCAACAACG
GGTAGATCTATGGGACATACACGAACACATACCTCACAAGCAATACATTTATCGAATTCAAAATGAATTCGA
CCGCGGAAACGTTCTGATGTGATCGATTTTTCATAAGGATATTGAATAGTTACAGGTAAACGATTTGTATGG
GATAGGGTAATTATGAAACTTTGACCAATGTACCTTGCCGCCCGTATTGTTTGTTGACCAAAATTTATGAAC
CCGGTCACCATAGGGAACATATTGTAGATCTCCGTGAATAATTTGATGTTTCTTTCTCTTGTTTAAGATCAG
TTATGAATGGGGAATATCGTTATCTTATTCTATTCTTTATAGGTAAATAAGTTGGGAAGAAGTTGTCAATAA
TAGATTACTCAGAGAAATAGGTAAAAGAAATTTCCATCCAAAATTTAAAAGTTGGTCCATTCTCAGTCTAGG
TAAAGTCCATCTTGCTGTGATAGGAATGAACAAAAACAAATAAGCTTTAGCTAATGTAATAAATATACCAAT
TGTTATTCCAAAAACTCCTGTCATTTTATTTAATCCGAAAAATTCAAGAATAGATATATACGGAATAGAGAA
ATTCCACCCGCCTAAGTAAAGAACTGTTATAAATAATGAAGAAACTAATAAATTTAGGTAAGAAGCAAGGTA
AAATAGAGCATATTTAATACCCGAATATTCTGTTTGATAACCTGCTACTAATTCCTCCTCTGCTTCTGGTAA
ATCAAAAGGTAATCTCTCACATTCTGCTAGAGAAGAAATTAGAAAAACAACAAACCCTATAGGCTGACGCCA
CAGATTCCACCCCCAAAAACCATATTTTGACTGTGACTCAACTATATCAACTGTACTTGAACTGTTAGATAA
TCATAGTCGATAATAACATTACTGTTCATATCGCTATTTCAAAACCGTACATGAGACCTCAGCTTCATACGG
CTCCTCTATGGTCACAAATAAATGTAAGTACTTGTTTGGTATTATTGTAATTTTTAGATTCTAATTCTAATA
CCGGGAAGTCCAAAATTAGACCAACGAAATTCCGTCTGCTAGAATAAAAAAGCGCTTCCGAATTGATCTTTT
CCATTAAAATTACAATTTCTCTTTATTCGGTAATAACTTAATCCTTAAATAAAATACTCGTTATATCAATAA
ATTTGGTTTTATCAATAACTCTAAAGAAAGAATTAGTTAGAAAGAATTGATCATTAATTCCAAATTTCTGAT
TAAGAATTCCATGTATGTATATAGTAGATATGAATATTGAATGGGGAAAAGAAATAAGAAATAAATATCCTG
TATCGTATTTTTTTGTTTCATTTTTCCCATTCAATATTTTGCATTCTATTTCTTTTGCTCCTGTCCTATTCT
TCTTTCTCAGAGGAGAGGAGGTACTCTGAAAAAAAAAAATAAAGGATTAATTCGTTTTTTATAGTCATTTCT
TTAATCAGTGAATAGGAGCATACTCGAGATCGGAATCGTGGAGAAGTACTACTTGGTCATTTCTACCAACTT
AAAGTCCTCATTATGATTCGTTTTATCCAAAGCTTTATGTAAAAAAATCCTTTTTTTTTTATCTAAAATTAT
TTCCATTACTAATCTTTTGTGTACCTTGGTGTTCCTAACTGTCCACTGATTTTTTATTGATCTCCAGTATGG
TAATAAATACAAGACAGTAGTAGAAACCCCATACGGGTGATCTTTTGTACCCGCTTCAAGATATGATAATTG
GTCAAAGAATCTTAACCTTGGGGTAAACAGTTTATACTGCTTATGTTTCTATTCTCGTACATAGGGAATGAG
ATTTAATCCTCTTACTGCAAATTTATAAGCAGTTTGCTTTTACTCATCTAACTATCTAGCTTAATTCATCAA
CCCTAATGATAAATAAAAAAGAAAATATCCATTGAATATAATATAATATATTAAATTTCTTTATTCTATTTC
TAGTTCTAGAAAAGAGGGAAAATAATAATATTCTGCCGAATCACACGTAGAGATATTGATAACACACATAGA
GTTAATGGTATTTCATAACTGATAGATTGAGCAGCAGCCCGTAGACCACCTGAAAAAGAATATTTATTATTC
GACCCATATCCTGACATAAGAAGTCCAATAGGGGCAATACTTGAAATGGAGATCCATAAAAAAACGCCTATA
CTAAGATCGGCCAAAACAAGGTGATATCCAAAAGGAATTACTAAATAACTTAGTAGAACAGATATGACCGCT
ATAGACGGTCCCGCGCTGAACAAACGAATATCTCCTCTAGATGGGAGGAGATCTTCTTTAAAAACTAATTTG
GTTCCATCTGCTATAGCTTGAAGAATTCCCAATGGACCGGCATATTCAGGACCAATGCGTTGTTGTATTGCT
GCAGATATTTCTCTTTCTAACCACACAATTACTAGTACCCCTATTGTTATTCCCAATATAAGGGTGAAAATA
AGAACAAAGATCCATATTAGTCCATAGACTTCTTTTAAAGATTCCGATCTAGAAAAAGAATTTATAGCTTGT
ATTTCCGCTTCTGTCATATCAATTATCATTTCAACGATCAACTTCTCCCATAATGATATCTATACTACCTAA
TATCGTCATGATATCTGCCAATTTCATTCTTTTAACTAGTTGAGGGAGAATTTGCAAATTGATAAAACCAGG
TGGACGAATTTTCCATCTCCAAGGGAAAACACTACTATCTCCTATCAAATAAATTCCTAATTCTCCTTTTGG
GGCTTCTACTCTCACATAAAGTTCTTGCTTCGACAATTCAAAATTGGGCGAAAGTTTTTTAGTAATAAATCT
ATATTCAAAATTATTCCATTCGGAATTTTTTTCTTTATCAAAACGTCGGACTTCTAAATTCTCATAAGGTCC
TCCAGGAATTCCTTCTAGAGCCTGTTGAATAATTTTTATAGATTCCTTCATTTCACCGATTCGTACTAAATA
ACGAGCTAGTGAATCTCCTTCTTTTTGCCATTGGACTTCCCAATCAAATTTATTGTAACACTCATAACTATC
AACTTTACGAAGATCCCATTGGATTCCAGAAGCCCGTAACATTGGTCCTGATAAACCCCAATTTATTGCCTC
CTCTCCACCAATAATGCCCACTCCTTCAACGCGTTCCAAAAAAATAGGATTACGCGTAATAAGTTTTTGATA
TTCAACAATTCCTGTTAAAGAATAATCGCAAAAATCCAAACATTTCTCTATCCAGCCATAAGGTAAATCGGT
AGCAACCCCCCCAATACGGAAATAATTATGCATCATTCGCATACCTGTAGCGGCTTCGAATAGATCATATAA
CAATTCCCTTTCTCTGAAAATATAGAAAAAGGGAGTCTGTGCACCGATATCTGCCATAAAAGGTCCAAGCCA
TAATAAATGAGAAGCTATACGACTCAGTTCTAGCATAATTATTCTAATGTAACTAGCTCTTTTAGGTACTTG
AATGCTTTCTAATCGTTCTGGTGCATTTACTGTTATTGCTTCTGTGAACATAGTGGCTAAATAATCCCACCG
TGTTACATAGGGCAAATATTGTATAATTGTTCGATTTTCCGCTATTTTTTCCATCCCTCGATGTAAATAACC
CAATATAGGTTCACAATCAATAACATCTTCACCATCGAGAGTAACAATTAGTCGAAGAACACCATGCATTGA
TGGGTGGTGAGGACCCATATTCACTATCATGAGATCCTTTCTTGTAGCTGGTACAGTCATAACTTTTCTTCC
TTAATTCAATTCAGTATTCCATGAATTTAGCAAAATGAAGTTGATCAAAATGCAAAATTTAATAACTAAAGA
AAAAATTAAAACCAATCTTAAACTTTAAATTAACGAGTTTTTGACTCCCGAATACCCAACTGGTTAATCAAT
TTCTTATAACGTACTCGATTTTTCTTTGACAAATAATCCAACAGCCGTTGACGTTTTCCCAGAATTTTTCGT
AGACCTCTTTGTGATAAAAAATCTTTTTTATGTAATTTTAAATGTGAAGTAAGTCTTTGTATCTTATCAGTG
AAACTAAATACTTGAAATTCAACAGATCCACAGTTTTTTTCTTTTTCTTGTCGAATAGCCGAGATGAATGAA
TTTTTGACCATAAAAACAAAATTTTCTTTTTTTTTTCTTTTACACTAATTTTACCGATCAGGAAAAATAAAA
ATATTTATTATATGTGTTATTTGCAGTTATTTGAATTTAGTACAAAAAAATTTCTCATTTCTTCATATAGAA
TTTTTTCTATCCAAATCAAATTGAAAATTTGATTTGGATAAAAAGAAACGATCCATTTTTTTTTTTCAAGAT
TTTCCTATTCAGGAAAGAAAATGTTTTTTCGATAAAGAAAAATAGATATAAGATATAGAGGAAATATACTAT
GTTATATTTATATTTATTATATACTATTAAACTATTAATATAATTAAAAAATTTAAAGAATTCTGAATCGTG
GATACATATGTATTCTTGATATACTGAAATTACTGCCATTATTGGTATCAAACCAATAACGATTCATACAAG
CTAAATCTTCTAATCGATAATTGGGCCAAAGAAAAAATTTGAATTTAATGAATTTCTTTGTATATGTATTAA
GATGTTTTTCCTTGTTCAAAAATTGTCCACAGTTGTTTATGTTGTTTTGATTACAGAATATTGGATTTCTAC
CCATAATATTCCAATTCTGAGAATTAAAACAAATGCAAATTCTCAATTCTCTACGACGTCTGGGGGATAGAA
TATTTTCAGGAACAAGGAAATCATAATAATTTTTGTTGTTTTTAGTCATAAGTATATTGCTGTGTTGTGCAA
CAGATTCATGAATTTTTTTTTTATCAACATATTCTTTTTTTATTATGTATTTTCCATCAGTTTGGCGTTTAG
TCTTATCAACCAATGAAATACCTATAGTTTGATAGATAATATCTTTTCCATCCCTTTTCATAGATAGACGAA
TTGGTTCGACAATAAATATGCCTCTTTTTACCAATTCTGTAAGAGTTAGATCTTTCTGAATTAACATTACAT
CTAGATGCATCTCTCCTCTTTGAATTGAAGATATAGCTATTTCCTTTGGATCTATCAGTCTAAGTAGAAGAC
AATATACCTTTATATTATTGATCATTCTTTGATTCAAGAGATCATCCCATCTTAATTGAAAAAGAAAATATT
TTTTCAAGAAGAAATTGAGTTCTGCTTCTTTCTTGCTCTTAGATTGTTTTTTTTTTCTACTTTTTTTAATGT
CTGTTCTTGTATAATCTGTCTCAACATCTTTTTCATTTTGTTTTCGTAAATCTAATACAAGATTTCCTTGAC
CTTGTTGTTCATTTTTTTTTTTTACATTGATCTTTTTACTTTTACTAATATTTTCATAGAAATGAAAATTAA
AAATAAGTAATTTGGTAGGTATGATCCACGGTTTTATTTTATACGCATTAAAAAGTAGTACAAATTCTGGGA
AAAACCAAGGTTCTAGATCTGATATGCTACGAGAGAATTTTTCTTGATTCATTCCCATCCAATCAAAAAAGG
AATTTTTTTTTAATTTTTGATAATTTAGATTTTTAGTATTTTTATGAATCTTGGTGTTGATAGGTGTATTGT
CCCGGGTCTCAATATCAATATTATTTCTAATAAAGAAATGGGGAATTTTATAATTTAAAAATAGTCTATCCA
TAGTTTTGTCCGTATCAATGAGAAATCTTTTTTCTAGATAATTATTAATAACTATCCTTATCAATCCATAAA
ATGGTTCGGGTTTTAGTGTATTGAAATTAGATGAAATTTTTTTGTTTTCCACTTCTTGTAATTGTAACGTTG
ATTCATAAATATATGAGTTTTTATTATCCTCAAAATTTATATATTTATATGATAAAATATCATATCCTAAAT
GTTTTTTCAATTTGTCTTTTTGACTCATCAATGAATTTACTGCATAGTAATTTTCTTTCATGTAATGAATTA
ATTGGTCTTTTTCTTTTTTATATAAATCCGATTTCGTTGAATCTTTTTTTTGAATTATACGACATTGGTTGG
CCCTATTTTGCCATTTTTTTGGTACTAAATAAGACCACTTAGTCTGAGATAAATTATATTGATAATGACCCC
TTAACCACATTTTCCATTTATTCATTCTATACTTATGTATTTTCTTATGCTTTGGTTTGGAACCAAATATTC
CTTGTGTTGTAGAATAATTCTTTATTATATCTGTAAGAAAAGGATAGGTGTTATGATATTGAAGTACAGATT
TCAAAGCATATTTATTAAGTAATTGATTTTGCGAGAATTTGTAAAATATATATGCTTGAGACAAAGAAGATA
AGTCCCAATAAATATTAGAATTTTTGTTGCTAATACTAAAATTAGTATTATAAAAAATATTATAAAACGACT
TTTTTATAGTCGAAATAAAGTTCATTATTTTTTGATTTGTCTTTTCAATTCCTTCTTGATTTGTTTTATCAT
TATAAATGTATTTAGTTAAAATTTTGTTTGTTGATTTAAAACTTGGAATCTTAATGATACATAGTAATAGAT
TAATGTATATTTTTTCAATGAAATATTTTATAAAATAATGCGATTTACGTATTAATCGGATATTATTTCTTT
TAAATATTTGCCAAATATCCTTCTGTAATTCCGCTCTTTTATCATCATAAGTTAGAACTTTTTTTTTATTGT
CTTTTGTGATTCCTTTTATTTGATTCCTAATTGTGATTGTCTTATTAGCAAGATCTTTCATTTTTGTTTCGA
TGAGTGAATAATTTGCATTTCCGCAATTCAGGAATTGAATTGCAATCGTCGATTCGCGAAGAATCTTATTAT
TTATATTAGAATCTCTTCCATTTTTATTTTTAGTTGATTCATATATTTTAACCCTACTCGATTTAAATATGG
GTTTTACTTTTTCAAGTTCTTTCATTATTAGGTCCAAAAATAGAATTATTTTGATGACCCATCTTGTTTTTT
TTTTTGAAACTTTTAGAACCCCATTTCCTCTTTCTTTGAAAACTCTTATAACTTCTAAAATTTTCTTTTTCG
CTTTTATCGTTTTTTTTTCGAGTTCTTTAAAAATGGGTTCAAAGAAAGAAGGTCGTTTTCGGGGAGACCCAA
AAGGTAGCTCTGCTTCTCTTCCCCAAACTGTTAAAAAACAAAAGTTATCTTTTTTCTCTTTTTTTTGCCTTT
GCTGATCTCCATAATTAAATCGTACCTTAGATCTTTGCCAAGGTTTCAGACAAAAAGGAAATAGAATCTTTA
TTTGAATACCATCTCTTAACCAATTTTTGGGAAATTCCGTTTCTGATAATTGAACACCATTATAAGTACATT
TAACATGCATTTCTCCATTCCATTCCTTCCAATCCTCGTACCATTCGGGGAATTGAAACAATAACATACGAC
TAATATTTTTAGCTATTATTAATAGGGGAAATAGAACATATTTTCTAAGAAAAGATTGGGTTACTAATATTA
AACCTCTTATTGCTTGAGTAAATAGAAAGCTATCCCAAGCCTCTGATATTGCTATTCGTTCATTTTCCTCTT
CTTTCTCTTTGTTTGTTTTCTCATTTTCTTTTGTATGTTCTTGCTCAAAATAATAAATTTGAGATTCTGAGG
TTCTCCCTAACCAATTCCTAATTTTAAATATATCAAAAAACGAAAAAAAAAATGTTTTATCTATTCGATCCA
AAAAAAGTGGAGAATGCGCATTTGCTTGAAATATTTTCAAGATAATTGTTTTACGTCTTTGAGCACGCATAG
ATCCTTTGATTATACCACGGCGAAAATCCGATTGTTGTGAGTAACGTATCAAAGCCACCTCGTCTTCTTCAT
CACTAGTATTACTAGTAGTATTATTAGTAGCACTCGAATTAGTACTCTGATCGTTATCAGTATAAATTATTA
TGCGTTTCCCTTTTCTTGACCGAATTTCGGGATCTTCCGTCGATTCTTCTTCATCTTCTTCTTCCAAATCAT
CTGTTAATTTGTATGACCATCTAGAGACCTTTTTACTAATTTCTTCCATTCCAATAGAATTTTTTCTAATTT
TTATTAGATCATTTGGATCAGTTGTAATTACATCGAATAAAAATTTCAAAGATTTTATTTGACTTTCTGAAT
CTATTCCTTGCGCACGTTCAAAATAAAATTTTTCAATTGAGGTTAAGGAATTCTCAATAGGATTCGATAAAA
ATTTCTCATCAGAATAAAACCTATTCTTTTTATGTTCAAATGTTTGAGAATTCTTAGGAAATAGACCATGAA
TTTTATTTATCCACAATATTTCTAAGGAATCCACTCTTGAAGTTATTAAATCAGTCATGATTTCATCTGAAT
CTACATTTTTTATTGTTCCGCGATAAGGTCCATTCAAAAGGGGATCATACATTTTGGGTAAATATTCTTGTT
CATGCTCATCATCACATAATCTGGTTCTTTTTTCTAGTATATTTAAAGTAAAAGATCCTTTCTCTTTTTCTA
AATTTTGTATTCTACTTACAAATTCGTTCCTTAAGTTGTATTTTTTTTGTTCATTATTATAAATCCAATAAT
TATATAGGTCTTGGTGGTATAGTTTTTCTGTCGTGTAGAAATAAATTTTTCGCTCTATCATTTCTGAAAAGG
TTGATAAACTTGGCGGATATGTAAAAGAGATTAGATTTTTTCCTTTATTTGGGCATATATAAAAAAAATATT
GTGCCATTTCATTTCGTATAGCATTTTCAAACCTATCATTTTTAAAATATCTCAATGGGCGGTTCCATCGTT
TATAATCGAAAAGAAAAGTTACAATAGGTTTTTCAAACCAAAAATAAGTTTTCTCTTCTTTAAGTTTTCCTA
ATTCCCAATTATCTTGATGGATATCAAGATAAGAATCTTCGTAAACCGGGCTATCTTTGTCTTCTTTAGTGG
ATCCCTCTTGTTCCTGTTTCGTCTTCTTCGTTTCGTAAGTTGTTTCTACATCGCTTTCTTCCGTTTCTGAGG
TTTCTTTCAGTTTCTTAGTACCAATAGGCGATGGCATTCTGCCTAAATAGTAGACACAGGTGATAAATAAGA
GAATACTAAAGATTCTAGCCATAGAATTTCTCAATTCTGACACAAGGTACTTATTAGATCGAATCAAATGAT
TTTGCCGTATCCAGAATAATACCAATCCAACCCATTTCATGAATAAAATGTGACCAATTAACCAACCAACAA
AACTACTTGTTACAAATAACATCTTGTTGTTGCATCGAAACATATAAATGTTGACTAATCTGGCTAACGTTG
AACTTGGTAAAATGAAATGGTTGAATAATTGAAAAATGAGATTATTCAGGAATACACATTGAATGCTGAGAT
TACGCATGGAATTTCTGGTAGTAGATCCATAATCAAAAAAGTTTTTGTGATTGTTCCAGAAGAAATGAAACA
AAAGATACGGTAGAACTAGGACAGTTATTGTATGAGGTCTACCCAATGCTAGATGCAGAGGCGCATAATAGA
TCGATATGAACATCATGAGCTGCCCCGTAATAAAACCCGTTGTTGCTGATATCTCCTTCTCAGTTCCTTCTT
CCATAACCCGAGCTCGGAGAAGGAAGAGATAAGAGGGCCCTATGGAAAATGTGGTCAGAAATCCATAATAGA
GTCCGACCACAACGACCGAATTTATTATCTTCATGCATAAGGATAATAGATTACCTAGTAGAAAAGATTTTA
AAATCATCACAAACCTCCCTTTTTTCTTTTCTATTTCAATTTCTCGATTATTATATGATGATTTCTTAACTT
TCCATATATAGAAAGAGATAGACTAGAAATGACATCTCTTATGTCAACGATACCATCTTCTTCGATTGAATG
ACATCTCTTATGTCAATCACACCAAAGAAATATTAAATGAATGGAATTGGGATATAGATGGAATATAATGAA
ATAGAGCCACTTTGAGGTTCCCTATGAAATGAGGCATGGAACGGAGCCACTACGAAGAAGTTCCGGGAGTTA
CGAAGGAAGCTTCGGACTCATGGGTTGAGAACGGGAGTTGAACTCTATGAGGTCGAATCTCCCGTTGTTCCT
CAGTAGCTCAGTGGTAGAGCGGTCGGCTGTTAACCGATTGGTCGTAGGTTCGAATCCTACTTGGGGAGATTT
GATTGATTCTTAATTTCATTAAAGAATGCAGAATTGAATGAAAGGGCTCGCTTTGACCATTAGGGGTAGGTA
ACCCGTTCCCTGTCTTTGTTTCTATTGCATTCTATCTCATCGTATCACATTCTGTTTTACGATATTTGAGAA
TCACCGTCAATACCTCGGCGTAGATCCGAGGTAATCCCTTGTAAATAGCCCTGTGTCTATTTATAACTAGCC
AATTAAGAATTCTCAGATGATGTACTAGCAGTGCATCAAAGATGCAGTCATCGATTCTCCCGATAGACCACA
ATTAACGCGAGCAAACATATTAATGACGAGGAACGCATTTTTGCTATGCTACTAATACTTGTACTTGCTCTG
CTATTCTGCCCAAGCCTGGCTGAGGAAGAGTTACGGGGAGTAAAACACAAATATGCTAATTCAAGTATGGTT
ACTATATGTAATTATAAAGCCTTCACGATAAAATAAATAAAAAGTAAGGCCATTCCATTTCGACAAAAGACC
ATACCCAAGTTCAATAGCTTTGCGTCCGCTATCCCGATCATGATTTTCTTACCCCCCAGAGGGAAAGGTCCT
TCCCTTTTGGGCCGGTTGTGGGCGAGGAGGGATTCGAACCCCCGACACCGTGGTTCGTAGCCACGTGCTCTA
ATCCTCTGAGCTACAGGCCCCACCCCGTCTCTACTGGATCTGTTCCCGGGAGTACCCTCAAAAAGGAACCTC
TCCTCAGCCATTTCGTTTCGGGTTAAGAAGATGTGAAAGTGCGTTTCTCTCTATAAGAACAGTGCGTTCTGA
GGTGTGAAGGGGGAGAGAAGAGATATCATAATTGAGGTTTTGAATAAGAGGACCTTTGCATTTTTTTTAGTA
AAATAAGAGGTGTTAAGCTTTTTATCATTCTGGCGTCGAGCTATTTTTCCGCAGGACCTCCCCTACAGTATC
GTCACCGCAGTAGAGTTTAACCACCAAGTTCGGGATGGATTGGTGTGGTTCCTCTACGCCTAGGACACCAGA
ATATCGAATCATGAACAAAGAAAGGCATGAGAATGAGAGAAATATTGGCTAGTGATTGTGAGGCCCCAATTC
TTGACTGGAAGGAACACCAAAGGCCTCCGCCCTTCCCTATCTATCCAAGGGAGGGAAGGGCAGAGCTTTTGG
TTTTTTCATGTTGTCAAACAGTTGAACAATGAAAATAGATGGCGAGTGCCTGATTGAATTGATCAGGTCGTG
TAGGAACAAGGTTCAAATCTCTCGGTCTGTTAGGATGCCTCAGCTGCATACATCACTGCACTTCCACTTGAC
ACCTATCGTAATGATAAACGGCTCGTCTCGCCGTGACCTTATCTTGGATTCTCAATACTTCTGTCGCTCCAT
CCCCGCAGGGGCAGAGAACCCATCGCTGTCTCGGCTGTGCTACCGGAGGCTCTGGGGAAGTCGGAATAGGAG
AGCACTCATCTTGGGGTGGGCTTACTACTTAGATGCTTTCAGCAGTTATCCGCTCCGCACTTGGCTACCCAG
CGTTTACCGTGGGCACGACAACCGGTACACCAGAGGTGCGTCCACTCCGGTCCTCTCGTACTAGGAGCAGCC
CCTCTCAAATCTCAAACGCCCACGGCAGATAGGGACCGAACTGTCTCACGACGTTCTAAACCCAGCTCGCGT
ACCACTTTAAATGGCGAACAGCCATACCCTTGGGACCGACTTCAGCCCCAGGATGTGATGAGCCGACATCGA
GGTGCCAAACACCGCCGTCGATATGAACTCTTGGGCGGTATCAGCCTGTTATCCCCGGAGTACCTTTTATCC
GTTGAGCGATGGCCCTTCCATACAGAACCACCGGATCACTAAGACCTACTTTCGTACCTGCTCGACGTGTCT
GTCTCGCAGTCAAGCGCGCTTTTGCCTTTATACTCTACGACCGATTTCCGACCGGTCTGAGGGAACCTTCGT
ACTCCTCCGTTACCTTTTGGGAGGCCTACGCCCCATAGAAACTGTCTACCTGAGACTGTCCCTTGGCCCGTA
GGTCCTGACACAAGGTTAGAATTCTAGCTCTTCCAGAGTGGTATCTCACTGATGGCTCGGGCCCCCCCGGAA
GGAGGCCTTCTTCGCCTTCCACCTAAGCTGCGCAGGAAAGGCCCAAAGCCAATCCCAGGGAACAGTGAAGCT
TCATAGGGTCTTTCTGTCCAGGTGCAGGTAGTCCGCATCTTCACAGCGATTTCAATTTCACTGAGTCTCGGG
TGGAGACAGCGCCGCCATCGTTACGCCATTCGTGCAGGTCGGAACTTACCCGACAAGGAATTTCGCTACCTT
AGGACCGTTATAGTTACGGCCGCCGTTTACCGGGGCTTCGATCAAGAGCTTCGCGTTAGCTAACCCCATCAA
TTAACCTTCCGGCACCGGGCAGGCGTCACACCCTATACATCGTCTTACGACTTTGCAGAGACCTGTGTTTTT
GGTAAACAGTCGCCCGGGCCTGGTCACTGCGACCCCCTTTGTGAGGAGGCACCCCTTCTCCCGAAGTTACGG
TGCCATTTTGCCTAGTTCCTTCACCCGAGTTCTCTCAAGCGCCTAGGTATTCTCTACCTAACCACCTGTGTC
GGTTTGGGGTACGGTTCCCTTTTGTTGAAGGTCGTTCGAGCTTTTCCTGGGAGTATGGCATGGGTTACTTCA
GCGACGTAGCGCCTGGTACTCGGACATTGGCTCGAGGCATTTTCTCTACCCCTTCTTACCCTGCAAAAGCAA
AGTCACCTTGCGTCCTTGAACCGATAACCATCTTTCGGCTAACCTAGCCTCCTCCGTCCCTCGGGACCAACA
AGGGGTAGTACAGGAATATTCACCTGTTGTCCATCGACTACGCCTTTCGGCCTGATCTTAGGCCCTGACTCA
CCCTCCGTGGACGAACCTTGCGGAGGAACCCTTAGGTTTTCGGGGCATTGGATTCTCACCAATGTTTGCGTT
ACTCAAGCCGACATTCTCGCTTCCGCTTCGTCCACACCTGCTTGCGCGGGTGCTTCCCTCTAAGGCGGAACG
CTCCCCTACCGATGCATTTTGACATCCCACAGCTTCGGCAGATCGCTTAGCCCCGTTACATCTTCCGCGCAG
GCCGACTCGACCAGTGAGCTATTACGCTTTCTTTAAAGGGTGGCTGCTTCTAAGCCAACCTCCTGGCTGTCT
CTGCACCCCTACCTCCTTTATCACTGAGCGGTCATTTAGGGGCCTTAGCTGGTGATCCGGGCTGTTTCCCTC
TCGACGATGAAGCTTATCCCCCATCGTCTCACTGGCCGACCTTGGCCCCTGTAATTTTGGGGTCATATCTAG
TATTCAGAGTTTGCCTCGATTTGGTACCGCTCTCGCGGCCCGCACCGAAACAGTGCTTTACCCCTAGATGTC
CAGTCAACTGCTGCGCCTCAACGCATTTCGGGGAGAACCAGCTAGCTCTGGGTTCGAGTGGCATTTCACCCC
TAACCACAACTCATCCGCTGATTCTTCAACATCAGTCGGTTCGGACCTCCACTTAGTTTCACCCAAGCTTCA
TCCTGCCCATGGATAGATCACCCGGGTTCGGGTCTATTCCCAGCGACTAGACGCCCTATTAAGACTCGCTTT
CGCTACGCCTCCCCTATTCGGTTAAGCTCGCCACTGAATATAAGTCGCTGACCCATTATACAAAAGGTACGC
AGTCACAGAACAAAGTCTGCTCCCACTGCTTGTACGCACACGGTTTCAGGATCTATTTCACTCCCCTCTCGG
GGTTCTTTTCGCCTTTCCCTCACGGTACTAGTTCACTATCGGTCACTCAGGAGTATTTAGCCTTGCAAGGTG
GTCCTTGCTGATTCACACGGGATTCCACGTGCCCCATGCTACTCGGGTCAGAGCGTAAGCTAGTGATGCTTT
CGGCTACTGGACTCTCGCCATCTAGGGTGCAGCACTCCACTGCTTCGCCTAGCAGCACGACGCTTGTATTGC
TCTCCCACAACCCCGTTTTCACGGTTTAGGCTGCTCCCATTTCGCTCGCCGCTACTACGGGAATCGCTTTTG
CTTTCTTTTCCTCTGGCTACTAAGATGTTTCAGTTCGCCAGGTTGTCTCTTGCCTGCCCATGGATTCAGCAG
CAGTTCGAAAGGTTGACCTATTCGGGAATCTCCGGATCTATGCTTATTTTCAACTCCCCGAAGCATTTCGTC
GCTTGCTACGCCCTTCCTCGTCTCTGGGTGCCTAGGTATCCACCGTAAGCCTTTCCTCGTTTGAACCTCGCC
ATTAATGTTAAGGCTATGCCATCCTAAGGTGCTGCTAAATGGAAGGATCTTATCAACGTCCATGAATGAAAA
ATCATAGATCGAACTGCCGAATTGAAAAAATTGGGTGTTGTCATAGTATCAGCTAAGTGCACGGGCTGGAGA
TAAGCGGACTCGAACCGCTGACATCCGCCACAGGGTAAACCACCGCCTCTCAGGCCTCCCCGGCTGATTCTA
CCATAGAGGCCAACGATAGACAATAACTCCCCCCCGAACACAGCTTACAACTTTCATCGTACTGTGCTCTCC
AAAGAGCAACTCTTCTCAAAATCTCAAAAGGTGCTGAGTTGGAATCCCATTCATTCTAAGGATTCTTGTGGT
TCCGGAGAATCCAGCTACAGGAGAACCAGGAACAGAGAGCTCTCTCCCTTTTTCCGCCCGACTCTTTGGTCT
TAAGAATGCTGGTTTTATTTTAAGAACGAGTGATTGCCCTTCTCCGACCCTTACTGCCCAACCGGAGAGCGG
ACAGCTAATGCGTTCCACTTATTGAACAGGGTCTATGGTCGGTCCGTGACCCCTGGATGCCGAAGGCGTCCT
TGGGGCGATCTCGTAGTTCCTACGGGGTGGAGACGATGGGGTTGGTCCATGGATTTTCCTTCCTTTTGCCAC
ATTTCGCTCAAAGCAAAGGGTTGAAGGGAGATAGTGCATCAAGCTATTCGCAAGGGCCAACTTGATCCTCTT
CCCCAGGGATCCCAGATGATGGAACCCTAGGAGAGCCGCCGACTCCAACAATCGTCCATGTACGATCCATAC
TAGATCTGACCAACTTCCCATCCTACCTCCTCTACGTTCTTGACAGCCCATCTTTTTGTCTCAGTAGAGTCT
TTCAGTGGCATGTTTCGGTCCTCTTCCCCATTACTTAGAAAAAGTGAGCCACCGGTTCAGGTACAAGATACT
ATCATTACCGCCTGGACAATTAGACATCCAACCCGTAATCGCAACGACCCAATTGCAAGAGCGGAGCTCTAC
CAACTGAGCTATATCCCCCCGAGCCAAGTGGAGTATGCATGAAAGAGTCAGATGCTTCTTCTATTCTTTTCC
CTGGCGCAGCTGGGCCATCCTGGACTTGAACCAGAGACCTCGCCCGTGAAGTAAATCATCGCACCTATGATC
CAACCAATTGGGAGAGAATCAATAGATTCTTTTTCGGGAGCGATTCATCCTTCCCGAACGCAGCATACAACT
CTCCGTTGTACTGCGCTCTTCAAGTGTGCTTGTTCCCCCTTCTCCCTTACCATGGCAAGTCTTTGTGAAATA
ACTCCGATGGGAAGAAAAAAGAAGGCGTTAAGAGACCTCCTGGCCCAACCCTAGACACTCTAAGATCCTTTT
TCAAACCTGCTCTCGAGTCAAGAGATAGATAAATAGACACATCCCATTGCACTGATCGGGCTCGTAGTGACT
GAGGGGGTCGAAGACCAAGAAGTGAGTTATTTATACCAAGCATTCTTCTTATGGCTAGATCCAATCTCCTGG
TCCCTGCGGAAAGGAAAAAGAATTTCACGTTCTTCCTTTCGGGAAGGGAGGATTAGGGAAATCCTATTGATT
GCTGCTTTCTCCAGACCTCCGGTAAAAGCATGAAAAAAAGGCTCGAATGGTACGATCCCTCCGTCACCCCAG
AATGAAAGGGGCGATCTCGTAGTTCTTGGTCTGTGAAGATGCGTTGTTAGGTGCTCCATTTTCCCATTGAGG
CCGAACCTAAACCTGTGCTCGAGAGATAGCTGTCCATACACTGATAAGGGATGTATGGATTCTCGAGAAGAG
AGGAGCCACGGTGGTCCCCCCCGGACCGCCCGGATCCCACGAGTGAATAGAAAGTTAGATCTACATTGGATC
TCACCTGAATCGCCCCATCTATCCTCCTGAGGAGAAGTTTGGTTTCAAACTCCGATTCGAACAGGAGGAGTA
CGCCATGCTAATGTGCCTTGGATGATCCACATCTCCGGGTCAGGCGCTGATGAGCACATTGAACTATCCATG
TGGCTGAGAGCCCTCACAGCCCAGGCACAACGACGCAATTATCAGGGGCGCGCTCTACCACTGAGCTAATAG
CCCTTCGTGCGGGCCTCCCAGTGGGAGGCCTGCTATGCCAAAAGCGAGAGAAACCCCATCCCTCTCTTTCCC
TTTTGCGCCCCATGTCCCTCTCGTGTGGCGGCATGGGGACGTAAAAAGTGGGATCCTACCAACTTGTTCCGA
CCTAGGATAATAAGCTCATGAGCTTGGTCTTACTTCACCGTCGAGAAACGAAAGAAGACTTCAATATCCAAG
CTTAGCTCAGACGTAGCTCGCTTCTTTTTGGGTGTGAAGCAGTGTCAAACCAAAATACCCAACAAGCATAAG
CATTAGCTCTCCCTGAAAAGGAGGTGATCCAGCCGCACCTTCCAGTACGGCTACCTTGTTACGACTTCACCC
CAGTCATGAATCACACCGTCGGCAACCCCCTCCCGAAGGTTAAGCTAGCTACTTCTGGGCAACCCACTCCCA
TGGTGTGACGGGCGGTGTGTACAAGGCCCGGGAACGTATTCACCGTGACATTCTGATTCACGATTACTAGCG
ATTCCGACTTCACGCAGTCGAGTTGCAGACTGCGATCCGGACTACGATCGGTTTTATGGGATTAGCTCCACC
TCGCGGCTTGGCAACCCTTTGTACCGACCATTGTAGCACGTGTGTAGCCCAGGCCGTAAGGGCCATGATGAC
TTGACGTCATCCCCACCTTCCTCCGGTTTGTCACCGGCAGTCTCCTTAGAGTTCCACCATTACGTGCTGGTA
ACTAAGGACAAGGGTTGCGCTCGTTACGGGACTTAACCCAACATCTCACGACACGAGCTGACGACAGCCATG
CAGCACCTGTCTCCGTGTTCCCGAAGGCACCAATCTCTCTCTAGAAAATTCACGGGATGTCAAGGCCTGGTA
AGGTTCTTCGCGTTGCATCGAATTAAACCACATGCTCCACCGCTTGTGCGGGCCCCCGTCAATTCATTTGAG
TTTTAACCTTGCGGCCGTACTCCCCAGGCGGTCAACTTAATGCGTTAGCTACGGCACTGAACGGGTCAATGC
GCCCAACGCCTAGTAGACATCGTTTACGGCGTGGACTACCAGGGTATCTAATCCCATTCGCTCCCCTAGCTT
TCGTCTCTCAGTGTCAGTGTCGGCCCAGCAGAGTGCTTTCGCCGTTGGTGTTCTTTCCGATCTCTACGCATT
TCACCGCTCCACCGGAAATTCCCTCTGCCCCTACCGTACTCCAGCTTGGTAGTTTCCACCGCCTGTCCAGGG
TTGAGCCCTGGGATTTGACGGCGGACTTAAAAAGCCACCTACAGACGCTTTACGCCCAATCATTCCGGATAA
CGCTTGCATCCTCTGTCTTACCGCGGCTGCTGGCACAGAGTTAGCCGATGCTTATTCCCCAGATACCGTCAT
TGCTTCTTCTCCGGGAACAGAAGTTCACGACCCGTGGGCCTTCTACCTCCACGCGGCATTGCTGCATCAGGC
TTTCGCCCATTGTGCAATATTCCCCACTGCTGCCTCCCGTAGGAGTCTGGACCGTGTCTCAGTTCCAGTGTG
ACTGATCATCCTCTCAGACCAGCTACGGATCGTCGCCTTGGTGAGCCATTACCTCACCAACTAGCTAATCCG
ACGCGAGCCCCTCCTCGGGCGGATTCCTCCTTTTGCTCCTCAGCCTACGGGGTATTAGCAACCGTTTCCAGT
TGTTGTTCCCCTCCCAAGGGCAGGTTCTTACGCGTTACTCACCCGTCCGCCACTGGAAACACCACTTCCCGT
CCGACTTGCATGTGTTAAGCATGCCGCTAGCGTTCATCCTGAGCCAGGATCGAACTCTCCATGAGATTCATA
GTTGCATTACTTATAGCTTCCTTGTTCGTAGACAAAGCTGATTCGGAATTTCTTTCATTCCAAGCATAACTT
GGATCCGTGCGCTTCATATTAGCCTGGAGTTCGCTCCCAGCAATATAGCCATCCCTACCCTATCACGTCAAT
CCCACAAGCCTCTTATCCATTCTCGTTCGATCGCTGCGGGGAGCAAGTCAAAATAGAAAAACTCCTATTGGG
TTTAGGGATAATCAGGCTCGAACTGATGACTTCCACCACGTCAAGGTGACACTCTACCGCTGAGTTATATCC
CTTCCCGGCCCCATCGAGAAATAGAACTAACTAATCCTAAGGCAAACGGTCGAGAAACTCAACGCCACTATT
CCTGAACAACTTGGAGCCGGGCCTTCTTTTCGCACTATTATGGACAAATTCCTTTTCTTAGGAACACATACA
AGAAAAAGAATAATGGTAACCCCACCACTAACTACTTCATTTTCATTTATGAATTTCATAGTAATAGAAAAT
ACATGTCCTACCGAGACAGAATTTGTAACTTGCTGCCCTCTTGCCTAGCAGGCAAAGATTGACCTCTGTGGA
AAGACTGATTCATTCGGATCGACATGAGGGTCCAACTCCATTGCATTGCCAGAATCCATGTTATATATTTGA
AGCAGTTGACCCCTTGCTTCGCTCATGGTACAACCCTCTTCCCGCTGAGCCACCTTTCTCCTCGGTCCACAG
AGACAAAATGTAGGACTAGTGCCAACAGTTCATCACGGAGGAAGGGACCCACCGAGCCGAGATCACTAACTA
ATACTAATATAATAGAAAAGAACTATCTTTTCTGTATACTTTCCCCGATTCCGTTGCTATCGCGGGCCTTAC
GCAATCGATGGGATCATATAGATATCCCTTCAACACAACATAGGTCATCGAAAGGATCTCGGACGACTCACC
AAAGCACGAAAGCCAGGATCTTTCAGAAAATGGATTCCTATTTGAAAAGTGCATAACCGCATGGATAAGCTC
ACACTAACCCGTCAATTTTGGATCCAATTCGAGATTTTCCTTGGGAGGTATCGGGAAGGAATTGGAATGTAA
TAATATCGATTCATACAGAAGAAAAGGTTCTCTATTGATTCAAACCAAACGCTGTACCTATGGGATAGAGGA
AGAGGAAGAAACCGAAGATTTCACATAGTACTTTTTTTTGATCGAAAAATCAATCTGATTTATTTCGTACCC
CTCGCTCGATGAGAAAATGGGTCAGATTTTACAGGATCACCAAACCTTATGGGACTTAAGGAATGATGGAAG
GAAATAAAAAGAAAAGAGAGGGAAAGAAAATCGAAATGAAATAAAGAATAAAAAAAAATAAGTAGAAAATAG
AAGAGCCCAGATTCCAAATGAACAAATTCAAACTCGAAAAGGATCTTTCTGATTCTCGAAGAATGGGGGGCA
AAGGGATTGATCGAGAAAGATCTCTTGTTCTTATTAGATTAGAATAGAAGATCGTGATTTGATCCGCATATG
TTTGGTAAAAAGAATAATCTTCTTCTTTGATCCTAAATGGAAAGTGTTCAATTGGAACATGAAAACGTGAAT
GAATTGGTCTTAGTTACTCTTCGGGGCAGAGTGGAAGAAGGGAAGAGATTCTCGAACGAAGAAAAGGATCCA
ATTACTTCGAAAGAATTGAACGAGGAGCCGTATGAGGGGAAAATCTCATGTACGGTTCTGTAGAGTGACTTG
TCTGTCAACTTTTCCACTATCACACCCAAAAAACCAAACTCTGCCTTACGTAAAGTTGCCAGAGTACGATTA
ACCTCTGGATTTGAAATCACTGCTTATATACCTGGTATTGGCCACAATTTACAAGAACATTCTGTAGTATTA
GTAAGAGGAGGAAGGGTTAAGGATTTACCCGGTGTAAGATATCACATTGTTCGAGGAACCCTAGATGCTGTC
GGAGTAAAGGATCGTCAACAAGGGCGTTCTAGTGCGTTGTAGATTCTTATCCAAGACTTGTATCATTTGATG
ATACCATGTGAATCGCTAGAAACATGCGAAGTGTATGGCTAACCCAATAACGAAAGTTTCGTAAGGGGACTC
GAGCAGGCTACCATGAGACAAAAGATCTTCTTTCTAAAAGAGATTCAATTCGGAACTATTATATGTCCAAGG
TCCAATATTGAAATCATTTCAGATATTTTCCCTTACTTTGCCCGTGTCAACAAACAATTCGAAATACCTCGA
CTTTTTCAGAACAGGTCCGAGTCAAATAGCAATGATTCGAAGCACTTCTTTTTACATTACACTATTTCGGAA
ACCCAAGGACTCAATCGTATGGATATGTAAAATACAGGATTTCCAATCCTAGCAGGAAAAGGAGGGAAACGG
ATACTCAATTTAAAGTGAGTAAACAGAATTCCATACTCGATCTCATAGATACATATAGAATTCTGTGGAAAG
CCGTATTCGATGAAAGTCGTATGTACGGCTTGGAGGGAGATCTTTCATATCTTTCAAGATCCACCCTACAAT
ATGGGGTCAAAAAGCCAAAATAAGTGATTCATTTTTAGCCCTTATAAAAAAAAACTTATTTTTGAACCTCTT
TCACGCTCATGTCACGTCGAGGTACTGCAGAAGAAAAAACTGCAAAATCCGATCCAATTTATCGTAATCGAT
TAGTTAACATGTTGGTTAACCGTATTCTGAAACACGGAAAAAAATCATTGGCTTATCAAATTATCTATCAAG
CCGTGAAAAAGATTCAACAAAAGACGGAAACAAATCCACTATCCGTTTTACGTCAAGCAATACGTGGAGTAA
CTCCCGATATAGCAGTAAAAGCAAGACGTGTAGGCGGGTCGACTCATCAAGTTCCTATTGAAATAGGATCTA
CACAAGGAAAAGCACTCGCCATTCGTTGGTTATTAGGGGCATCCCGAAAACGCCCGGGTCGAAATATGGCTT
TCAAATTAAGTTCCGAATTAGTAGATGCTGCCAAAGGGAGTGGCGATGCCATACGCAAAAAGGAAGAGACTC
ATAGAATGGCAGAGGCAAATAGAGCTTTTGCACATTTTCGTTAATCCATGAACAGGATCCATATAGACACAT
AGATCCATGGATCCATACATCTCGATCGGAAAAGAATCAATCGAAAAAGAAAGAATCGGAATTGATCGATAT
CTTTCTCGAAACAAACAAAAAGAAAGATGAAACATAAATCATGGATCAACTAAACCCTCTCGAGGGCTTGCT
TAAGAATAAGAAAGAGGAATCTTATGGAAATATCATGGAATAAGGTTTGATCCTATTCATAGGGATTCCGTA
AATAAAATATCCAAAAAGTTTGAAACAATTGGGACTTTTTCGGAGATTGGATGCAGTTACTAATTTATGATC
TGGCATGTACAGAATGAAAACTTCATTCTCGATTCTACGAGAATTTTTATGAAAGCGTTTCATTTGCTTCTC
TTCAATGGAAGTTTCATTTTCCCAGAATGTATCCTAATTTTTGGCCTAATTCTTCTTCTGATGATCGATTCA
ACCTCTGATCAAAAAGATAGACCTTGGTTCTATTTCATCTCTTCAACAAGTTTAGTAATGAGCATAACGGCC
CTATTGTTCCGATGGAAAGAAGAACCTATAATTAGCTTTTCGGGAAATTTCCAAACGAACAATTTCAACGAA
ATCTTTCAATTTCTTATTTTACTATGTTCAACTCTATGTATTCCTCTATCCGTAGAGTACATTGAATGTACA
GAAATGGCTATAACAGAGTTTCTGTTATTCGTATTAACAGCTACTCTAGGAGGAATGTTTTTATGTGGTGCT
AACGATTTAATAACTATCTTTGTAGCTCCAGAATGTTTCAGTTTATGTTCCTACCTATTATCTGGATATACC
AAGAGAGATGTACGGTCTAATGAGGCTACTACGAAATATTTACTCATGGGCGGGGCAAGCTCTTCTATTCTG
GTTCATGGTTTCTCTTGGCTATATGGTTCATCTGGGGGGGAGATCGAGCTTCAAGAAATAGTGAATGGTCTT
ATCAATACACAAATGTATAACTCCCCAGGAATTTCAATTGCACTTATATCCATCACTGTAGGAATTGGGTTC
AAGCTTTCCCCAGCCCCTTTTCATCAATGGACTCCTGACGTATACGAAGGAGTGCGGTTCGCTCAACAAATT
CCTACCTCTATATCTATCTCTGAGATGTTTGGATTTTTAAAAACTCCATAGACATGCAGAAGAGAAATGCTA
TCCCCACTCGGACCAAGACATAACTTTTACCAAAAGTTTTTTATGATCTTTTTGTTCAAATAACAATTAAGG
TGAAGCAGGGTCAGGAACAACGAATCTCTTTATGATAAACAGATCCATTTTGCAAGTTCGTTATTACGGGTA
GTTCCTACAAAGGATCGGACTAATGACGTATACAATACTTGAATTATCGATGTAGATGCTACATAGTTGGTT
CTCATCCTTCAGAGACTACGAGTGTAATAAGGGCATCCGTTGACAAAAGGATCACCCTAAGATGATCATCTC
ATGGCTATTGAGAACGAATCAAATCAGATGGTTCTATTTCTCAATCTTTCTGACTTGTGCTCCTACGGAACC
AAGGTCGAAAGATTGAAAAAGTCAGTCATTAACAACCACTGATGAAGGATTCCTCGAAAAGTTAAGGATTAG
TAATCCTTTTTAGAAATCGAATGGATTCGGTCTTATACATACGCGAGGAAGGTAATCAAAAAAGAAAGAAGA
TGAGTTCTTCTTTCTTTTATCACTTAGGAGCCGTGCGAGATGAAAGTCTCATGCACGGTTTTGAATGAGAGA
AAGAAGTGAGGAATCCTCTTTTCGACTCTGACTCTCCCACTCCAGTCGTTGCTTTTCTTTCTGTTACTTCGA
AAGTAGCTGCTTTAGCTTCAGCCACGCGAATTTTCGATATTCCTTTTTATTTCTCATCAAACGAATGGCATC
TTCTTTTGGAAATCCTAGCTATTCTTAGCATGATATTGGGGAATCTCATTGCTATTACTCAAACAAGCATGA
AACGTATGCTTGCATATTCGTCCATCGGTCAAATCGGATATGTAATTATTGGAATAATTGTTGGAGACTCAA
ATGATGGATATGCAAGCATGATAACTTATATGCTGTTCTATATCTCCATGAATCTAGGAACTTTTGCTCGCA
TTGTATCATTTGGTCTACGTACCGGAACTGATAACATTCGAGATTATGCAGGATTATACACGAAAGATCCTT
TTTTGGCTCTCTCTTCAGCCCTATGTCTCTTATCCCTAGGGGGTCTTCCTCCACTAGCAGGGTTTTTCGGAA
AACTCCATCTATTCTGGTGTGGATGGCAGGCAGGCCTATATTTCTTGGTTTCAATAGGACTCCTTACGAGCG
TTGTTTCCATCTACTATTATCTAAAAATAATCAAGTTATTAATGACTGGACGAAACCAAGAAATAACCCCTC
ACGTGCGAAATTATAGAAGATCTCCCTTAAGATCAAACAATTCCATCGAATGGAGTATGACTGTATGTGTGA
TAGCATCTACTATACCAGGAATATCAATGAACCCAATTCTTGCAATTGCTCAGGATACCCTCTTTTAGCTTC
TAGGCCTATTTCTTAGTTCAAGATCCCTCTTACTAACTGGAATAAAAGAATTAGTAGATCTGTTCCGCCCAA
AATGGGCTGGGGTTATGAACTTATAATCATGGAATCGACTCGATCATCAGATTATAAGTTCATTCCATACCG
GACCAGACCGGAATAGGGTTATGTACATTCTTATTATGAGAAGGGGTCATTCGAGCGTATGTAAATAGATAC
TATGTTTCCATATGGATCCCTACATCGTTACATTCTATTTAGGATTAGGAATAGGCGTAATCGGACCTGCTT
TTGACATATCTATCGTTATTTGGGTACCATATTCACTTCTTTGGGCTTCTATTGAATCGAGAAATAGGTTTG
ATTGTACATCTTTTTGATATATAGGGTATCCTACGGATAATTCAAATCGAAGCAATTTGATGTCTGACTCGG
GCCTATATGACATGACCGATCGATAGAAATACCCCAACACTCCATCCACCTTTGTCCATATATTCCATATAT
CACACTAGATAGATATCATATTCATGGAATACGATTCACTTTCAAGATGCCTTGATGGTGAAATGGTAGACA
CGCGAGACTCAAAATCTCGTGCTAAATAGCGTGGAGGTTCGAGTCCTCTTCAAGGCATAATATTGAGAATGC
TCATTGAATGAGCAATTCAATAACGGATTTCGGATCTAATCAATATTGATATACCGAGTATCTTATCTGTTG
ATACGAAGTATTCCGGCGATCCCCACGATCCGAGTCCGAGCTGTTGGAATTGGAACAGGTTCGGCAGCAGAT
CACGAAATCTTGGTGATCTTCTCTATCTAATGAATGAGGAGTCCGTTTGGAAATCGTCCGCCCCGCGCCACC
CCCCGAGTATATGATTCAACAGGAATCACACAGGGGTAGATTGATAGAAACCTCTAGTAAAATACCCACCAG
TACCCGTAACCCAGCGGATAAAGTACATTACATAGTACATTTTAGGGATTGGCGACTTACCCATTCAGTGAC
TTTGGCACTGGACGTTCCCAAAATGGGTACTATCGGGTCGGGTGAATTAGAGAATAGACAGACGCCTGTTGG
CATTCCAGCTTTCCTTCTCTTTTCAGGGCCTATCCGAAAGAGAATCCAGTACCTCTTGGTCGTGAATAGGAC
GAACCACCTCCATGGATATCTTTGCTTCGGAACAAAACAATTAGAATTAGGCTCGGTCAACCAGAATATGTA
TTATCCATATGGGAGATCTTCCAATTGAGAAGATCCATCGACCTGAGACGAAGAGAAAGGTCTATCTATTTT
CTTTAGTTATTCAGTTAAACCAATGATTCGTTATTGGAGCAGATAGCAACAATCGTTTCATCGGACATGCGT
ATTTTTTCTTTTCCGACGGATTTCCATGGTTTCATTAATGGAAATTCTTTGATGTAGTGAGTAATAGGCTCT
GGTTGTTCACCGTTCAAGAATTCTTGTTTAGGCAGTTCATATCATCCATACATAGTGTTTTGATCTAAGATT
TCAATTCTTCCATGCTTCAGCAGTAGCATATTGCTCCATGGAGCTAAGGTCCAAAATATGGAATAAACAAGT
GTTTCCACGACTCTACCATCCGGCCAATTCTGTTCCACTTAATCCCCTTTTCATGGCCACATATCTTTACGG
CTAAGGAATGGGAAATCTTTCCCCTGTTACATGAATCAAATATTTCATTTCATCCGGGAAAAGCCATCTCTT
TCTCCACAATGTCTTTGCCATTTGATCCAATAGCGTTCCGTTAGATAGGAAGAGATTTGATAAATACTGATA
ACTCTCGGATGGAGTATTAGAACGGAAAGATCCATTAGATAATGAACTATTGGTTCTAAGCCATCTCTGGCG
ATGAATCAACAATTCGAAGTGCTTTTCTTGCGTATTCTTGATGAACCAGTGTCTAGATATAGATGTAGAAGA
ATTTGTTTGGGAAGTAATAAGCCCCTTTGACATCTCTTCATCTGCAAAGAATTCTCGACGCGAAAACACAGA
GACAAAGGGCTGATCTTTGAATAGGAAAAAGAATGGATCTGCAGGGTCCCAAATGAATTGGCTTATTCGAAA
AAAGCCTTGTTCTTTGGACGATCTATCTCGTGTCTGGTACTGCATGGTTCCACTCTGCAAGAACTCCGAATC
ATTCTCTTGAAGCTCATCCTTTTTATGATAAATGATCCGCTTGCCCCGAAATGACCCGGCCCAATAGGGAAA
TCCCAATTGAGTGGACCTTTCGATACAATCAAATAGATTGCCACAAGGGCGCCATATTCTAGGAGCCCAAAC
TATGTGATTGAATAAATCCTCCTCTATCTGTTGCGGGTCGAGGGCCCCTTCCCCTTCTTCAAACTCCGATTC
GTATTTTTCATAGAAAAATCTCTGATCAACGATAGAAAAAGATCCATTTTGCATCATATCTAACGGATTCCT
TGGTTCGGACCGAAGAAGTAATGTCACTCGATTATTATCAAACTGACTCCAATCCTTTTCTGTCCGTGAGGA
TCCCGCCAGAGCGCCTTCTACTTCTAATAGGCCACGAACTAGATCAGAAGCATTCTCAACGAATCCATAAGA
AGTGATCCTATTTTTTTCACCGGATCCGGGTCCGGGTGAAGACCAAAGATCTTGAGCGACCAATCCGGCAGA
ACAACTCAAAAGATAAAGAAGTATCGTTAATTTCTTCATGCTCGTTCCAAGTTTGAAGTACCATTTGTACAA
ATAGGAATCTCCTTCCTTACACGATTTCTTCTTCATATAGATAGATATAGGATCTATGGGGCAATTACTTAG
AAGTACATTTTGTGCAACAGCCCTTCCTATCTGATAGAAAAAGACCCCATGATCCTGAACCGATCTTACCTG
GGATCGCAAATCCCAAGTTTGTCTATGAAGAGCGGATCTAATTGTATTAGTTTCTATAATTGATTTCTTCTG
TGTAATACTAATTGATAGGGCCTCATTGATAAGTGCTACAAGATCTCGTGCATTAGAACCCATGGTTATGGA
CCCGAATCCGTTAGTATGGAACATTTTCTTTTCCAAGTGAAATCCCCTAGTATATGAAAGAATGCAAAAGTG
CTTTCGTTGTTGTGGAATAAGAAGCCTTCGTATCTTAATGCATGTATTTAATTTATTCGGAGCTATTAGAGC
GGGATCCACTTTTTGGGGAATATGAGTCGAAGCAATAACAAGAATATTTCTAGTGGAACATCTTTCACAATC
CCTGGAGAGATAGTTCTCTAATAGACCGAGGGATAAGTAATTCGACTCATTCACATACAGATCATGAATGTT
TGGAATCCATATTATGCAAGGAGACATTGCTTTTGCTAATTCGAATTGAAGGGTGATATCAAATCGGTCTAT
TTTCGGCGTCATATACATAGTTAGCACATTCGTCATAGTTAGCAGCTCCGTATCAAGGTCATCATCAATATC
GTCACTATCATCAATATGGATATCGTCACTATCATCAATATCATCAATAAGATACTCTTTAGGCTTGTCATC
CAGGAACTTGTTCGGAAATACCGTAATGAAAGGAACATAGGAGTTTGCCGCTAGGTTTTTGACCAAACAGGA
TCGTCCAGTTCCTATAGAACCTATCACTAAAATACCCCTAGAAGGGGATAGGGCTAAGCGGAGCGAAAAGGG
TTTTCCATGAGATGGGAAATGAAAACTATTAGCCCCACACGAGGTTTGTGAATAAGTGATTGTCTGATAATG
AGCAAGGAATATCCGTCTTTCTGCTAAACAGAATCTATTGAACTCATAATTCATTAGATACTTTTTCTGAAT
GTCAACTAAGTATCGTAAGTAAATTGATCCCGGTTGTTCAATCATTTGATAACCCGAGTCATTCTTTGATAA
AGGATCACTATGAGTCAGACTCAATAGAATTTGATCAATCCTTTTTTCTGTCATTAAGGTGGAGAACTGAAC
CAAGAATTCTCTTTCTTCATCATCAATCGAATCACTGTTCGCGACCCAGGATTCCATTTTATCATCAATCCA
ATCACCGTTCACATTTTTTCTTTTTCTTATCAATGAATAGATCTCTTTACTTGTACGACTTAGATGTCTCGT
ATTTCTCGAAAAAGTGATTCGATTGATGGAATTTGGTATGATACTTATGAGATCGATGAGATTTATATTCAA
ATATTTCTTCTTAGAACATATTGATTTGACCCCATAAGTGGGACCACCACCCAATAGCATGTTGCCACCAAA
AGCAGAACCCCGTATCTCTTCCAGAGAATCTCCTAATTGTTCCAGAGCAACTAGAAAGAGATTCTTTAACCA
AAAAGAATTCAGTTCAGATGTAGGATACCTATCCAGAAGTTTTCGCAACTCAATCATGTATGATGGAATCAT
CAAAGATTTTATCTTTTCTAACTCTGTCTGTAACTCACTAGAGGCTCGGGAAAAAAAGAGAAGATGGATACG
AACGAGATATCCAGCAACAAGAAGAAGGAAAAGGATTGAATAGAGGAACTCCCAAGCATTTCTTGATCTCAG
ATGTGCCCATATCAATGGAACGGGTGACTCATTATTTCGATGAATCATTTCTTCGGACAGAAGAAGATTCTG
TAAACACTTATTCGAAATCTCACTTATCAGAGTCCATTGTGGAAGAATCCTCTGAGGAATTGGCCATGATAT
ATCTGATCCATACATAATATCATGAAAAATGGATACAAATTCTTGACTGCTACTTAGTATTGGCAATGGGTC
TGAAAAAGTATCTACAAGGGCGAAATTTAGATATTTGCACCCTGTCGAAGTAAGGAACCATGGCATATATGT
TTGGAACAGATTCCATTTTGAGAGATTTGAAAAAGCACTATCTCGTTGAAAGGTTCCATACATCTGCCCTTT
CTCAACGTATTTCTTTAGACAAAGACTCCGTTTTTTCCTCTTTCCGGATGGTAAATATTTCTCAGAACATGG
AGTGTGAATCAAACCCATGTTTGAATTGAAACTAAGATACTGATGCAAGTTCTTCCCTTCTGAATCAGATAG
ATTCATATCTGAAAGAGGCCGACAATAAGTTCTTTCAAAATTGACTATTCGTTCCTCTCTTAGAAATGTTGC
AGAAATGTCGGCGATCGAGTAAATAGCTCTACGAACGACCGGATCGGATCGAATTGGAAAATGGAAAGATTT
GTACAAGTTATACGTTTCATCACCACTTTGTAGAAAATCGTTAGGTATGAATATATCAGATACCTGTGACTC
GATTGGTGAAATAGTCTCTCTCTCCAAAAAAATATGTTTTTTTTTACCGACGCACAAAGAAAATATTTTGTT
GCGAATGAACAAGATATTGAGGAATTGTCCATATGTAAGATCATCATTATGGATACGGGTCTTTTCCACAGA
AAAAGGGAATCTTTTGTTACAATAGAACCAGAAGTGATGTGGATCATTCAAGAATCGAAGTCGATTTGCTTT
ATAAAAAGAAGATATCAATGAACTTCTATGAAATGGTTTCACGGGATTCAGCCAATTGTCTCGATCGTGGGA
TATCATTGAGAAATAGGAATCCGTGTTATCAAAGAATTTTCCGCAATTATTTCTAGTATGGAATGAGTCAAT
CATCCACTTTGGTATCTTTTTGAACAAAAATGGTAATATTGTTCCTCCATTGATCAAGAATTTCGGTCTTTG
GGAAGTATCACGATCATCCAATAAGAAGGGTTTCAATTTATTCAAATGAACGATTTGAACACCTATTGATTC
TAACAACTGATTGCAGGGTTGATCATTCGGACTTTTCAATTCATAGATGTGGATCTCGGACCTATGAATGGG
GGTATTCCCCATACTCACAAAGAAAAAGGGAAGTGATTTGGACAAAAAGGGAAGTGACTTGGACAAAAAGAG
AAGTGACTTGGACAAAAAGAAACGAAGTGACTTAGACAAATCTTGTTTGTCGATAGCCTCGGACCAATCAAT
CGAATATTGACTCATACGTAATCGATCGAACACTACTTGAAAACGGTTCTTCTGTTCAGAAACGAAATGTTC
CAAATGTTCCTGTAAATTCTTGCTCCCATTGGACCATTTGTATCTATATGCATCAGGATCCCGATTCATGGA
TCTCTCGGTTCGAGAAATAAGAGGATCAAACCATTTCTTCTGAGTCTCTTTCAAATTCAATAAATGTTGGTT
GATCGTATATTTCATTATAGTTATATGATTCAGAGTATCATTTCCTATTTGATCCCTTTGAATTCCATATTC
GAAGTTGCGATTGGATCTATTCATTAAAAAGAATCGATTCGATACATTTCTTATGTACCCATAGATGCTATA
TTGGATTTGAATCAGATTTCGGATCAATCTATATTGATTGACTGCCTCCATGATGTTGTTGCTAGCAAATAC
CACTGTTTTTAGTTTTGGATCTTCCAAATCATTCCCGCAGTGGATCCGGACCAATTTTTTTCTGATCCTTCG
ATAAAAAGATTCATTCTCCTCATAAAAAAGAGGAGGTAGAACCAATAAAGATTTCTTTTTCGATTCATCTCT
GGAGTTGAATACCTCATTCAAGAATTTTTTTTGATCCAACCCGTAGGAATCAATAGAAAAGGCAAATCCCCT
ATGATACACCAGATCCGGCTCGGTTATTGATAGAGTGAATAGATCTGCCATTTCTTGAAATCTCTCTTCTGA
TTCAAAATCGTGGTGTAACGTGTATCCCCCTTTGTTCCGGTTATGGAATAGATGAAATAAATCCAAAAATGG
ATTTTTTTTCAAGAATGAAATCTTATTGGAACTGTCCATATCTGGTTCATCCTTCGGAACCATATCACATCC
CGGATCTGATGAAATAGGATGAATTGAGACGGTATTTTGTAAATATGTAATTATCTTGAATATATCAACCAT
TTCTTTATTTTCCGATCGCCTGGAAGGGACAAAAGAAACATCTTGTTTTTTCTTCAAAAATTTCTGATCTCT
AGTGGACCTCTCAGTAGGATTCGAACCCAGATGAAGTTCTGACCATCTGTCAGAGAAAAAAGAACGAATTGA
TCTTGTAGGATTCCCAAGAAATTCTTCGATTTCTTTCGGAAGCAGATGATTATTCATCTGCTTCTCACGTTT
CGTGAATAGCCGGGACATTGAGGAAGATCCAAAAAGGCATTTCGGGAATCGATCTGATTCTATCTCTGTTCG
TTCCGTTTGAAGAAAGGAAGGATCCCAAAGAATCGATCTTTCTTTTAGTTGCTGAATCTCTGTTTGATCGAT
CAATGTGTGATATTCTGAATCCTCATTTCTAATGGAATCGAAATGATCTCTGGATTGATCAGAGGATCCTTT
CGATTGGCTAGAATCCGTTACTTGAACGAAAATAGATCTTGTGGAATCATATTGAATATTTGACAATACATT
CCGTACCCTGCTAAAAAACCAATCCTTGTTTACCAACCACACATTGTCTAACCAAATCCAATTCTCTCTCGA
TACGTTCCTCAAAAAATCCGATTCGTGCTGATTCTTCCCCCAACTAACGAAGAGATCTTGGCGGAATTGCCA
CATATGAAATTGAGCACAATTTTGCAAAGAAATACCCCACTTGTTTCTCGAGAAGAGATGGGAAACGTGCTC
AATATCATTTGATTGAATAGTTGCCTCAGCTCCTTGTTGTTTGAAGAAACCCTCCCCTTCAATTGGTCTTTT
TTCACGAAAAGCAGACATGAGATAACAAATCAAGTCTTTCCCTAAGATTTCGAATAGCTGTCCCGAATTCAA
GTTGATTATGTTTCGCTTCTTCCTCGGAGAAAGACGATCAAACAATTCCCAATCATGGTCCTTGCGGATCGG
ATCATCCGTATAGGATAAAAAAAGAAACTCCAGATATTTGCTATCTTTCTCTTTGAATGAGATCTCAATTCC
AGCTACGGTTTCATTAGCTATCTTACAACTAGAATCCCTCTTTTTTCCGATCCGGTTCCTCCACCACTGCGA
ACCCCGGTTCGATTCAGGCATGATACACTTTTTATTTATTGGGAGAACCCAAGTACTCTCTTGCGGATCCAT
GAAACAACTCTCAGAAATCTTTTTCTCTTTTGGAAGATACAGGAGTGAAACAATCAATCTATTGATATTGGA
AGACCAAAAAGATTCTTCCAATGTCTCATTTCTGGGTCCAATGGAATTCATAGGTATAGGAAGAAGCTCCAT
CAAATAGAGATTTTTTCTTTCGACCATCTTTCGATTGGTAATACGAGATATAAGGACCACTACTACAAGCAG
TACTACACCTTTGATCGTGAAATATCGATTGCTTGTTGAACCCTGTGAATCACGTGAAAGTAGGATACTCCA
AATTCGGGGGTCAGAGAGTTTCATAAAACGTTCTTGGTGGAAAAAAATGTGAGTGAAAGATCCCACTGAATC
GAATTTGATCCATGAATCTAAGAAATAGTGAGAATTCTTGATCTCACTCAATATCTCTCTCAATTCGAAGAT
CCAGGATTTGAATTGATATCGTTTCATTGATTCCTCCTAAAGATTTTCATTGATTCCTCCTAAAGATTTCAT
TTCAATTGGAATTTGGTTATTCACGATGTACAATGAGCCCTGTTAAGCATCCATGGCTGAATGGTTAAAGCG
CCCAACTCATAATTGGCAAATTCGTAGGTTCAATTCCTGCTGGATGCACGCCAATGGGAACGTTCAATAAGT
CTATTGGAATTGGCTCTGTATCAATGGAATCTCATCATCCATACATAACGAATTGGTATGGTATATTCATAC
CATAACATATGAACAGTAAGAACTAGAATTCTTATCGATACTGGAACTCATAGGGAAGAAAATGGAGTTATG
GATGGAATCAAATATGCAGTATTTACAGAAAAAAGTATTCGGTTATTGGGGAACAATCAATATACTTCTAAT
GTCGAATCAGGATCAACTAGGACAGAAATAAAGCATTGGGTCGAACTCTTCTTTGGTGTCAAGGTAATAGCT
ATGAATAGTCATCGACTCCCAGGAAAGGGTAGAAGAATAGGACCTATTATGGGACATACAATGCATTACAGA
CGTATGATCATTACGCTTCAACCGGGTTATTCTATTCCACCTCTTATAGAGAAAAGAACTTAAAGCAAAATA
CTTAATAACACGGCGATACATTTATACAAAACTTCTACCCCGAGCACACGTAATAGAGCCATAGACAGTCAA
ATGAAATCCAATCCACGAAATAATTTGATCTGTGGACAGCATCATTGTGGTAAAGGTCGTAATGCCAGAGGA
ATCATTACCGCAAGACATAGAGGGGGAGGTCATAAGCGTCTATACCGTAAAATCGATTTTCGACGGAATGAA
AAAGACATATCTGGTAGAATCGTAACCATAGAATATGACCCTAATCGAAATGCATACATTTGTCTCATACAT
TATGGGGATGGCGAGAAAAGATATATTTTACACCCCAGAGGGGCTATAATTGGAGATACCATTATTTCTGGT
ACAGAAGTCCCTATATCAATGGGAAATGCCCTACCTTTGAGTGCGGTTTGAACTATTGATTTACGTAATTGG
AAGTAACCAATTAGGTTTACGATGAAACCTAGAAATCAATCACTGATCCAATTTGAGTACCTCTATGGGATA
GACCTCAACAGAAAACTGTTGAGTAACGGCAGCAAGTGATTGAGTTCAGTAGTTCCTCATAGAAAATTATTG
ACTCTAGAGATATGGTAATATGGAGAAGACAAAATTGTTTGAAGCACGCACAGAACCGGAAGCGCCCCTTGT
TTCAAAGAGAGGAGGACGGGTTATTCACATTTAATTTGATGGTCAGAGGCGAATTGAAAGCTAAGCAGTGGT
AATTATAAAGATCCCCCCGGGGAAAAATAGAGATGTCTCCTACGTTACCCGTAATATGTGGAAGTATCGACG
TAATTTCATAGAGTCATTCGGTCTGAATGCTACATGAAGAACATAAGCCAGATGATGGAACGGGGAGACCTA
GGATGTAGAAGATCATACATGAGTGATTCGGCAGATTTGGATTCCTATATATCCACTCATGTGGTACTTCAT
CATACGATTCATATAAGATAAAGATCCATCTGTCTAGATATCATCATATACATCTAGAAAGCCGTATGCTTT
GGAAGAAGCTTGTACAGTTTGGGAAGGGGTTTTTAAAAGAAGAATCTACTTCAACCGATATGCCCTTAGGCA
CGGCCATACATAACATAGAAATCACGCTTGGAAAGGGTGGACAATTAGCTAGAGCGGCGGGCGCTGTAGCGA
AACTGATCGCAAAAGAGGGTAAATCAGCCACATTAAGATTACCATCCGGGGAGGTCCGTTTGATATCCAAAA
ACTGCTTAGCAACAGTCGGACAAGTGGGTAATGTTGGGGTGAATCAACAAAGTTTGGGTAGAGCCGGATCGA
AGTGTTGGATAGGTAAGCGTCCTGTAGTAAGAGGAGTAGTTATGAACCCTGTAGACCATCCCCATGGAGGTG
GGGAAGGGAAAGCCCCAATTGGTAGAAAAAAACCCACAACTCCTTGGGGTTATCCTGCGCTTGGAAGAAGAA
GTCGGAAAAGGAAAAAATATAGTGATAGTTTTATTCTTCGTCGCCGTAAATAGGAATATTGAAAATAGAATT
TTTTGAATTTGAAATAATGTGATGGGCGAACGACGGGAATTGAACCCGCGCGTGGTGGATTCACAATCCACT
GCCTTGATCCACTTGGCTACATCCGCCCCTTATCTAGCTAAAGGATTTTCTCTTTTTTCCATTCATCATTAT
TGTATTTATTCTTACCTTCATACTTAGATCGAGATATTCTATTGGACATAGAATGCCAATCTTTAAAATGTA
AAAAAAGGAGTAATCAGCTGTGGCACGTTCACTAAAAAAAAACCCTTTTGTAGCTAATCATTTATCAAGAAA
AATTGAAAAACTCAACATGAGGGAGGAGAAAGAAATAATAGTAACTTGGTCTCGGGCATCTACCATTATACC
CAAAATGATTGGCCATACAATCGCTATTCATAATGGAAAGGAACATTTACCTATTTATATAACAGATCGTAT
GGTAGGTCACAAATTGGGAGAATTCGCGCCGACTCTGACTTTCGCGAGACATGCGAGAAACGATAATAAATC
TCGTCGTTAATTTGGAAAAAAAAATAGATACTTATCATTCATTGGCGGGAGATAACCTTATGATNNNNNNNN
NNNNNNNNNNNNNNN
