# Supplementary material for: Gene Loss, Pseudogenization in Plastomes of Genus Allium (Amaryllidaceae), and Putative Selection for Adaptation to Environmental Conditions
Source: Front Genet. 2021 Jul 8;12:674783. doi: 10.3389/fgene.2021.674783 (PMC8296844; doi:10.3389/fgene.2021.674783)
Supplement: Supplementary file 8 [file Table_3.XLSX]

## Sheet: Лист1
Family	Subfamily	Allium evolutionary line	Species	specimen (herbarium or DNA) voucher/plant material soures	Accession number	Ecology information	Source
Amaryllidaceae	Agapanthoideae	-	Agapanthus coddii	K:20081397	NC_035971.1	montane grassland, usually in permanently moist seepage below cliffs 1702м	http://redlist.sanbi.org/species.php?species=481-7
	Amaryllidoideae		Lycoris squamigera	Hantaek Botanical Garden, Yongin, Republic of Korea, 37°05'41.6″N 127°24'23.4″E	NC_040164.1	Shady and moist often disturbed places, along valleys, beside streams; near sea level to 1200 m	FOC Vol. 24 Page 268
			Lycoris longituba	no information available	NC_047452.1	Mountain slopes, shady and moist areas on slopes; low elevations. Jiangsu.	FOC Vol. 24 Page 269
			Lycoris radiata	Nanjing Botanical Garden, Mem. Sun Yat-sen (E118_83, N32_06), Jiangsu province, China	NC_045077.1	Shady and moist places on slopes, rocky places along stream banks; near sea level to 1000(--2500) m. Anhui, Fujian, Guangdong, Guangxi, Guizhou, Henan, Hubei, Hunan, Jiangsu, Jiangxi, Shandong, Shaanxi, Sichuan, Yunnan, Zhejiang [Japan, Korea, Nepal	FOC Vol. 24 Page 267
			Lycoris chinensis	no information available	NC_047451.1	Wild populations of these species in their natural habitat are frequently found on warm and moist sites in locations under a certain degree of shade.	Qin et al., 2003 from https://journals.ashs.org/hortsci/view/journals/hortsci/43/1/article-p134.xml
			Lycoris aurea	Duan20120827012	NC_046752.1	Shady and moist places on slopes, rock crevices; (100--)500--2300 m. Fujian, Gansu, Guangdong, Guangxi, Guizhou, Henan, Hubei, Hunan, Jiangsu, Jiangxi, Shaanxi, Sichuan, Taiwan, Yunnan, Zhejiang [India, Indonesia, Japan, Laos, Myanmar, Pakistan, Thailand, Vietnam].	FOC Vol. 24 Page 267
			Lycoris sanguinea	no information available	NC_047453.1	Grows in the somewhat shady understory of temperate montane deciduous broad‐leaved or mixed forests associated with conifers, such as Cryptomeria japonica and Abies firma	Kawano, 2009 (doi: 10.1111/j.1442-1984.2009.00249.x) Kawano S. Life-history \monographs of Japanese plants.13: Lycoris sanguinea Maxim. (Amaryllidaceae) // Plant Species Biology (2009) 24, 139–144
			Lycoris sprengeri	no information available	NC_047454.1	Sparse forests, bamboo forests, shady and wet places on slopes; ca. 100 m. Anhui, Hubei, Jiangsu, Zhejiang. Wild populations of these species in their natural habitat are frequently found on warm and moist sites in locations under a certain degree of shade	FOC Vol. 24 Page 268
			Narcissus poeticus	WSY:WSY0108940	NC_039825.1
			Clivia miniata	NEFI20190802WW1	NC_048961.1	The distribution falls within four regions/centres of endemism, namely the Barberton Centre. On sandstone and dolerite, in large colonies in evergreen forest, along shaded watercourses, ravines and ledges, grows epiphytically on rocks and in tree forks.	Duncan, G. 19 99. Grow Clivias, D. Snijman & C. Voget (eds). Kirstenbosch gardening series, National Botanical Institute, Kirstenbosch, Cape Town., Winter, 1. 2000. The natural distribution and ecology of Clivia. In M. Dower, C. Felbert & J. Winter, Clivia Yearbook 2: 5-9. Clivia Club, Kirstenbosch National Botanical Garden, Cape Town.
	Allioideae		Nothoscordum bivalve	01-17-0026-10	MZ019481	In North America it is found growing in open woods, barren tracts of land, disturbed sites, and grasslands		Baskin JM, Baskin CC (1979) The ecological life cycle of Nothoscordum bivalve in Tennessee cedar glades. Castanea 44:193–202, McNeal Jr D, Jacobsen TD (2002) Allium & Nothoscordum. In: Flora of North America North of Mexico. Oxford University Press, Inc., pp 244–278.
		I	Allium paradoxum	MW0599989	NC_039661.1	Grows in shady oak and oak-hornbeam foothill forests. According to the herbarium of Moscow State University: broad-leaved forest, forests along the gorge, shady places	Barling, D.M. (1971). Studies on gloucestershire populations of Allium paradoxum (Bieb.) G. Don. Watsonia, 1971.;Hanelt, P. (1996). Taxonomic problems in Mediterranean Allium, and relationships with non-Mediterranean Allium groups. Bocconea 5 (1), 259–65.
			Allium moly	01-17-0032-20	MZ019477	Widely spread in the West of the Mediterranean basin, from the South of France to the South of Spain, in the Pyrenees, in the High Ebro River Valley, in the Iberian System and in the Betic mountains .	(Danton & Baffray 1995, Gamarra & Fernández Casas 1989, Pastor 2009));IUCN. 2010. «Allium moly: Draper Munt, D.: The IUCN Red List of Threatened Species 2013: E.T172220A6852079». International Union for Conservation of Nature. https://doi.org/10.2305/IUCN.UK.2011-1.RLTS.T172220A6852079.en
			Allium ursinum	MW0599993	MH157875.2	Also known as ramson, is similar in its ecology with A. paradoxum. This is a widely spread species ranging from the Mediterranean to sub-atlantic regions, occurring predominantly in mountain ranges lower than 1900m above sea level (Heder et al., 2012) in Asia Minor, Caucasus, Siberia and Kamchatka. A. ursinum also prefers forest habitats, but it requires rather high light conditions, starting to …	Oborny B., Botta-Dukat Z., Rudolf K., Morschhauser T. Population ecology of Allium ursinum a space-monopolizing clonal plant. Acta Botanica Hungarica. 2011;53:371-388. DOI 10.1556/ABot.53.2011.3–4.18
			Allium zebdanense	MW0599988	MZ019480	Has a disjunct natural distribution, occurring in certain regions of Israel, Lebanon, Syria (in an area adjacent to Lebanon), and in northeastern Turkey. In Turkey the species grows in rock crevices and ledgeswhereas in Lebanon its distribution ranges down from humid subalpine meadows to lowland areas.	FIRAT M., KARAVELİOĞULLARI F.A., AZİRET A. Geophytes of East Anatolia (Turkey) //Manas Journal of Agriculture and Life Science MJAL 5 (1) (2015) 38–53)
			Allium fasciculatum	LH20180921-4	NC_045845.1	Dry slopes, meadows, sandy places; 2200-5400 m. SE Qinghai, W Sichuan, SE Xizang [Bhutan, Nepal, Sikkim].	FOC Vol. 24 Page 175
			Allium macranthum	no information available	NC_049102.1	Meadows, stream banks, damp places; 2700-4200 m. SW Gansu, S Shaanxi, SW Sichuan, S Xizang (Yadong Xian), NW Yunnan [Bhutan, Sikkim].	FOC Vol. 24 Page 176
			Allium kingdonii	no information available	NC_046030.1	Scrub, moist places; 4500--5000 m. SE Xizang.	http://www.efloras.org/florataxon.aspx?flora_id=2&taxon_id=200027494
			Allium monanthum	no information available	NC_042726.1	Woods and thickets on hills and lower mountains: Grassy mountain slopes and woods. According to the MSU herbarium grow in Japanese-Korean mountain, in broad-leaved and mixed forests on gentle mountain slopes, mountain forests, flooded forests, along streams.	Flora of Japan. Ohwi G., 1965, Smothsonian Institution.; Komarov, Flora of USSR, 1968
		II	Allium macleanii	MW-DNA-1049-A2	LT699703.1	colline to submontane grassy and steppe slopes, not too dense shrubs, and open places. According to MSU herbarium 1200-1900 m above sea level, Kazakhstan, Kyrgyzstan, rubbly rocky mountain slopes, river valley slopes, shady and light walnut forests, mountain river basins, hillsides, steppes along the road, sub-alpine and alpine zones.	(Fritsch, R.M. (2012) Geographic relations and morphological variation inside of molecular clades of Central Asian Allium species of subg. Melanocrommyum(Amaryllidaceae). Verh. Zool.-Bot. Gesell. Österreich 148/149, 245-263.).(Huxley A., Griffiths M., and Levy M. (1992). The New Royal Horticultural Society Dictionary of Gardening. The Macmillan Press, Limited: London. The Stockton Press: New York…
			Allium fetisowii	Tacheng, Xinjiang province, 47.1653°(N), 83.1329° (E )	NC_049100.1	Central Asia, Pakistan, Afghanistan, Pamir-Alai mountain range, western Nepal and north-western India (Kashmir and Utthar-PradeshSome sources state that it inhabits gentle slopes at altitudes about 1200-1400m above sea levelNevertheless Flora of USSR and other sources describe it as a high-altitude species, growing in treeless mountain valleys with a prominent summer drought)Allium associations 3…	FOC Vol. 24 Page 201, A_Preliminary_Review_of_Allium_subg_Melanocrommyum_in_Central_Asia, Fritsch, 2016
			Allium neriniflorum	Huairou, Beijing 40.1923°(N), 116.3578°(E )	NC_049103.1	Slopes, damp places, meadows, sandy places on coasts; near sea level to 2000 m. (2) According to the MSU herbarium, onion-grass steppe on the canopy, rocky areas, hillsides, steppe meadow, 500-700 m a.s.l., in Mongolia.	FOC Vol. 24 Page 202
			Allium ovalifolium	Maerkang, Sichuan, China	MH341457.1	Forests, forest margins, thickets, damp places, stream banks, rock crevices; 1500--4000 m.	FOC Vol. 24 Page 173
			Allium prattii	Litang county (29°8′52.56″N, 100°4′10.74″E), Sichuan province, China	NC_037432.1	Shady and damp forests, thickets, scrub, stream banks, slopes, meadows; 2000--4900 m. Anhui, Gansu, Henan, Qinghai, Shaanxi, Sichuan, Xizang, Yunnan [Bhutan, India, Nepal, Sikkim]	FOC Vol. 24 Page 174
			Allium nanodes	Litang, Sichuan, China	NC_045520.1	Scrub or meadows in high mountains, gravelly slopes, 3300--5200 m.	FOC Vol. 24 Page 173
			Allium victorialis	MW-DNA-1049-A6	NC_037240.1 LT699702.1	Geophyte, mesophyte, light-demanding plant. In humid high-mountainous forests, in forest and subalpine meadows. According to MSU herbarium 560-2000 m above sea level - subalpine wet meadows, thickets, pine forest.	http://www.agroatlas.ru/ru/content/related/Allium_victorialis., Winiarczyk, K, Skrzypczak, K., Jaroszuk-Ściseł, J., and Bocianowski, J. (2014). Investigations of the capacity and strength of seed germination in Allium victorialis L.» Acta Soc. Bot. Pol. 83, 219–28.;Yang, J.K., Jung, J.Y., Jeong, M.J., Yun, C.W., et al. (2014). Habitat influences composition of volatile constituents in Allium vict…
		III	Allium galanthum	ZD1108(KUN), ZD0932(KUN)	NC_050981.1	Dry stony and gravelly slopes, cliffs, valleys; 500--1500 m. N Xinjiang [Kazakhstan, Mongolia, Russia].	FOC Vol. 24 Page 194
			Allium schoenoprasum	MW-DNA-1049-A9	LT699700.1	Range of habitats, prefers a sunny position in a rich moist but well-drained or in heavy clay soils, also can grows in light shade, can be found at altitudes between 600 and 2,600 metres above sea level (in Italy).	http://antropocene.it/2017/06/30/allium-schoenoprasum/ , https://www.infoflora.ch/en/flora/allium-schoenoprasum.html;Firat, M., Karaveliogullari, F.A., Aziret, A. (2015). Geophytes of East Anatolia (Turkey). Manas Journal of Agriculture and Life Science 5 (1), 38–53.
			Allium altaicum	no information available	NC_040972.1	Ecologically and morphologically very variable species. 1700-1800 - 2400 m above sea level, rocky stone run, upper part of forest zone, subalpine meadows, among rocks, high grasses, stony, steppe glidder.	(1) Данилова, Котухов Ю.А. Труды Тегерецкого заповедника, (2) http://bioaltai-sayan.ru/regnum/eng/species_all.php?right=box-spec-p/allium.php&left=go.php&species=allium_altaicum, (3) MSU Herbarium
			Allium semenovii	MW0599986	MZ019479	Inhabits forest clearings, wet slopes and alpine meadows of Tien Shan (Xinjiang-Uighur Autonomous region of China, Kazakhstan, Kyrgyzstan) and Western Himalayas from Kashmir	Flora of China. - 2000. - Vol. 24. - P. 165-202. URL.: http://www.efloras.org ; Hooker, 1894)
			Allium chrysanthum	no information available	NC_042154.1	Slopes, plains; 2000--4500 m. Gansu, W Hubei, E Qinghai, S Shaanxi, Sichuan, SE Xizang, NW Yunnan.	FOC Vol. 24 Page 192
			Allium rude	no information available	NC_042158.1	Damp slopes, meadows; 2700--5000 m. S Gansu, SE Qinghai, W Sichuan, E Xizang. According to MSU herbarium: People's Republic of China: herb meadow, 3932	http://www.efloras.org/florataxon.aspx?flora_id=2&taxon_id=200027525
			Allium xichuanense	no information available	NC_042159.1	Slopes, meadows; 3100--4400 m. W Sichuan, NW Yunnan.	FOC Vol. 24 Page 192\
			Allium chrysocephalum	no information available	NC_042155.1	Damp slopes, meadows; 3400--4800 m	FOC Vol. 24 Page 189
			Allium herderianum	no information available	NC_042156.1	Sunny slopes, dry plains; 2900--3900 m. Gansu, Qingha	http://www.efloras.org/florataxon.aspx?flora_id=2&taxon_id=200027486
			Allium maowenense	no information available	NC_042157.1	Dry slopes; 1100--1500 m. NC Sichuan (Mao Xian, Wenchuan Xian)	http://www.efloras.org/florataxon.aspx?flora_id=2&taxon_id=240001035
			Allium platyspathum	MW0897614	LT673892.1	1900-3700 m. Agrillous rank soil in subalpine meadows	http://bioaltai-sayan.asu.ru/regnum/eng/species_all.php?right=box-spec-p/allium.php&left=go.php&species=allium_platyspathum,
			Allium caeruleum	Yamalike mountain, Xinjiang province 43.2712°(N), 87.5237°(E )	NC_049099.1	Geophyte, halophyte, light-demanding plants. On solonetz and solonetz meadows, in mountains steppe zone.	https://www.plantarium.ru/page/view/item/1934.html
			Allium obliquum	MW0599998	NC_037199.1	Rare forests and steppes, meadows, forest glades, along the banks of mountain rivers.	http://flower.onego.ru/lukov/allium_ob.html#:~:text=%D0%9E%D0%BF%D0%B8%D1%81%D0%B0%D0%BD%D0%B8%D0%B5%3A%20%D0%B2%20%D0%BF%D1%80%D0%B8%D1
			Allium strictum	Tacheng, Xinjiang province 47.1253°(N), 85.9127°(E )	NC_049106.1	In steppes, in larch forests and among shrubs, on rocks, rocky slopes / Altai Rep., Kem. region, Alt. krai, Novosib. Oblast, Rep. of Tyva, Rep. of Khakas, Krasn. Krai, Irk. Oblast, Rep. of Buryatia, Western Mongolia, East Kaz., North China. World-wide expantion: Eurasia, Russia (Eur. part, East and West. Sib., Far East), Mong., China	1. Flora of Siberia. Vol. 4: Eds. L.I. Malyshev & G.A. Peschkova. Science Publishers, Inc., 2001. - 239 p. 2. Friesen N. Allioideae of Siberia: systematics, caryology, chorology/ - Novosibirsk: Nauka, 1988. - p. 1-185.
			Allium nutans	MW-DNA-1049-A7	LT799837.1	in stipa, grassland and stony steppes, in spinney, in grass and saline meadows, in forest glades (birchwoods), on stony slopes, on rocks in pine forests, up to 1500 m.	MSU Herbarium; Revushkin A.S. High-altitude flora of Altai. Tomsk, 1988. -320p.) (Jiemei Х., Kamelin R. V. Allium Linnaeus // Flora of China. - 2000. - Vol. 24. - P. 165-202. URL.: http://www.efloras.org) (Shepeleva L.F., Gulakova N.M., 2010. Morphometric analysis of some stimulants and fertilizers effect on the pregenerative ontogenetic stage of different forms of Allium nutans L //Vestnik Tomsk…
			Allium przewalskianum	HNWP, WangHX2019002	NC_046059.1	Scrub, dry slopes, plains, rock crevices; 2000--4800 m. Gansu, Nei Mongol, Ningxia, Qinghai, Shaanxi, Sichuan, Xinjiang, Xizang, NW Yunnan [India, Nepal, Pakistan].	FOC Vol. 24 Page 183
			Allium polyrhizum	Hami, Xinjiang province 43.3426°(N), 93.165°(E )	NC_049104.1	Sunny slopes, pastures, saline-alkaline soils, gravelly places, desert steppes; 1000--3700 m. Gansu, N Hebei, W Heilongjiang, W Jilin, N Liaoning, Nei Mongol, N Ningxia, Qinghai, N Shaanxi, N Shanxi, Xinjiang [Kazakhstan, Mongolia, Russia].	FOC Vol. 24 Page 184
			Allium forrestii	Daocheng, Sichuan province 29.0826°(N), 100.0237°(E )	NC_049101.1	Meadows, gravelly slopes; 2700--4200 m. SW Sichuan, E Xizang, NW Yunnan.	http://www.efloras.org/florataxon.aspx?flora_id=3&taxon_id=200027479
			Allium praemixtum	no information available	NC_044412.1	Silurian dolomitized limestone ridges with steep slopes. 974 m above sea level with a rather dissected relief	Abdullaeva, A. , Duschanova, G. and Ravshanova, M. (2019) Structural Features of the Vegetative Organs of Allium praemixtum Vved. in Different Ecological Conditions. American Journal of Plant Sciences, 10, 536-544. doi: 10.4236/ajps.2019.104038.
			Allium oschanii	no information available	NC_044470.1	Relatively cold-resistant, light-demanding plants, heat- and drought-resistant, widespread in the middle belt of the Pamir and Altai mountains.	https://www.vegetables.su/jour/article/view/552/461
			Allium ampeloprasum	cultivar ‘Premier’; seed from Federal Scientific Center of Vegetable Crops, Russia	NC_044666.1	Broadleaf, native to the Mediterranean region (S. Europe, Northern Africa to W. Asia), though it has been introduced in other regions of the world, such as North and South America and Australia	Aedo, C. (2013). AlliumL. In S.Talavera, C. Andrés, M. Arista, M. P. Fernández Piedra, E. Rico, M. B. Crespo, A. Quintanar, A. Herrero, & C. Aedo (Eds.), Flora iberica. Volume XX. (pp. 220-273). Madrid: CSIC
			Allium cyathophorum	Mangkang, Xizang province 29.7234°(N), 98.5309°(E )	NC_045912.1	It grows at elevations from 2700 metres up to 4600 metres at grassy slopes	FOC Vol. 24 Page 176
			Allium mairei	Xianggelila, Yunnan province 27.4221°(N), 100.1562°(E )	NC_045913.1	Forests, slopes, meadows, rock crevices; 1200--4200 m. SW Sichuan, SE Xizang, Yunnan.	FOC Vol. 24 Page 176
			Allium pskemense	no information available	MZ147623	Rocks and slopes of higher belt of Western Teng Sheng, 1500 m in	Allium pskemense B. Fedtsch. // Plantarium. Plants and lichens of Russia and neighboring countries: open online galleries and plant identification guide. 2007—2021. https://www.plantarium.ru/lang/en/page/view/item/2137.html
			Allium fistulosum	no information available	LT674586.1	Cultivated species in Kazakhstan, Siberia and Far East of Russia	Allium fistulosum L. // https://www.plantarium.ru/lang/en, Verma, V.D., Pradheep, K., Khar, A., Negi, K.S., and Rana, J.C. (2008). Collection and characterization of Allium species from Himachal Pradesh. Indian Journal of Plant Genetic; Friesen, N., Pollner, S., Bachmann, K., and Blattner, F.R. (1999). RAPDs and non-coding chloroplast DNA reveal a single origin of the cultured Allium fistulosum f…
			Allium cepa	no information available	NC_024813	Worldwide cultivated species	Xinqi Chen et al. 2000. Liliaceae. In Wu, Z. Y. & P. H. Raven, eds. Flora of China. Vol. 24 (Flagellariaceae through Marantaceae). Science Press, Beijing, and Missouri Botanical Garden Press, St. Louis. Online at Flora of China: www.efloras.org
			Allium sativum	no information available	NC_031829	Worldwide cultivated species	Xinqi Chen et al. 2000. Liliaceae. In Wu, Z. Y. & P. H. Raven, eds. Flora of China. Vol. 24 (Flagellariaceae through Marantaceae). Science Press, Beijing, and Missouri Botanical Garden Press, St. Louis. Online at Flora of China: www.efloras.org
